# Supplementary material
Source: PubMed Central journal article supplement (PMC2836187)

## Supporting Information

Synthesis of phosphatase-stable, cell-permeable peptidomimetic pro-drugs that target the SH2 domain of Stat3

Pijus K. Mandal, Zhiyong Ren, Warren Liao, and John S. McMurray

|                                                                   |          |
|-------------------------------------------------------------------|----------|
| <b>Table of contents</b> .....                                    | S1 – S2  |
| Experimental methods.....                                         | S3 – S10 |
| <sup>1</sup> H NMR spectrum of <b>2</b> .....                     | S11      |
| <sup>1</sup> H NMR spectrum of <b>3</b> .....                     | S12      |
| <sup>13</sup> C NMR spectrum of <b>3</b> .....                    | S13      |
| <sup>1</sup> H NMR spectrum of <b>3</b> after TFA treatment,..... | S14      |
| <sup>13</sup> C NMR spectrum of <b>3</b> after TFA treatment..... | S15      |
| <sup>1</sup> H NMR spectrum of <b>4</b> .....                     | S16      |
| <sup>13</sup> C NMR spectrum of <b>4</b> .....                    | S17      |
| <sup>19</sup> F NMR spectrum of <b>4</b> .....                    | S18      |
| <sup>1</sup> H NMR spectrum of <b>5</b> .....                     | S19      |
| <sup>13</sup> C NMR spectrum of <b>5</b> .....                    | S20      |
| <sup>19</sup> F NMR spectrum of <b>5</b> .....                    | S21      |
| <sup>1</sup> H NMR spectrum of <b>6</b> .....                     | S22      |
| <sup>13</sup> C NMR spectrum of <b>6</b> .....                    | S23      |
| DEPT 135 NMR Spectrum of <b>6</b> .....                           | S24      |
| Proton decoupled <sup>31</sup> P NMR spectrum of <b>6</b> .....   | S25      |
| <sup>19</sup> F NMR spectrum of <b>6</b> .....                    | S26      |
| <sup>1</sup> H NMR spectrum of <b>7</b> .....                     | S27      |
| <sup>13</sup> C NMR spectrum of <b>7</b> .....                    | S28      |
| COSY NMR spectrum of <b>7</b> .....                               | S29      |

|                                                                         |     |
|-------------------------------------------------------------------------|-----|
| HPLC chromatogram of <b>7</b> .....                                     | S30 |
| <sup>1</sup> H NMR spectrum of <b>8</b> .....                           | S31 |
| <sup>13</sup> C NMR spectrum of <b>8</b> .....                          | S32 |
| HPLC chromatogram of <b>8</b> .....                                     | S33 |
| <sup>1</sup> H NMR spectrum of <b>BP-PM6</b> .....                      | S34 |
| TOCSY NMR spectrum of <b>BP-PM6</b> .....                               | S35 |
| COSY NMR spectrum of <b>BP-PM6</b> .....                                | S36 |
| <sup>13</sup> C NMR spectrum of <b>BP-PM6</b> .....                     | S37 |
| Proton decoupled <sup>31</sup> P NMR spectrum of <b>BP-PM6</b> .....    | S38 |
| <sup>19</sup> F NMR spectrum of <b>BP-PM6</b> .....                     | S39 |
| HPLC chromatogram of <b>BP-PM6</b> .....                                | S40 |
| <sup>1</sup> H NMR spectrum of <b>BP-PM279G</b> .....                   | S41 |
| COSY NMR spectrum of <b>BP-PM279G</b> .....                             | S42 |
| TOCSY NMR spectrum of <b>BP-PM279G</b> .....                            | S43 |
| <sup>13</sup> C NMR spectrum of <b>BP-PM279G</b> .....                  | S44 |
| <sup>19</sup> F NMR spectrum of <b>BP-PM279G</b> .....                  | S45 |
| Proton decoupled <sup>31</sup> P NMR spectrum of <b>BP-PM279G</b> ..... | S46 |
| HPLC chromatogram of <b>BP-PM279G</b> .....                             | S47 |
| <sup>1</sup> H NMR spectrum of <b>NP-PM6</b> .....                      | S48 |
| <sup>13</sup> C NMR spectrum of <b>NP-PM6</b> .....                     | S49 |
| <sup>31</sup> P NMR spectrum of <b>NP-PM6</b> .....                     | S50 |
| HPLC chromatogram of <b>NP-PM6</b> .....                                | S51 |
| <sup>1</sup> H NMR spectrum of <b>MP-PM6</b> .....                      | S52 |
| <sup>13</sup> C NMR spectrum of <b>MP-PM6</b> .....                     | S53 |
| <sup>31</sup> P NMR spectrum of <b>MP-PM6</b> .....                     | S54 |
| HPLC chromatogram of <b>MP-PM6</b> .....                                | S55 |

## Experimental Methods

Fmoc-Haic was purchased from ChemImpex or was synthesized as described.<sup>1</sup> Fmoc-Gln-NHBn was prepared as described.<sup>2</sup> Other amino acids were from ChemImpex or NovaBiochem. Rink amide resin was from Advanced Chemtech. Solid phase peptide synthesis was carried out as described.<sup>2,3</sup> Peptides and prodrugs were tested for purity by reverse phase HPLC on an Agilent 1100 HPLC using a Phenomenex Luna 5 $\mu$  C18(2) 4.6  $\times$  250 mm column. For both peptide intermediates and prodrugs the gradient was 10 – 80% MeCN/30 min each solvent containing 0.1% TFA. Peptides or prodrugs were purified by reverse phase HPLC on a Varian Dynamax HPLC using a Phenomenex Luna 10 $\mu$  C18(2) 21.2  $\times$  250 mm column. Gradients of MeCN in H<sub>2</sub>O at 20 mL/min were employed. For peptides 0.1% TFA was included in the eluents. For prodrugs no TFA was used in the mobile phase. NMR spectra were obtained on either a Bruker DPX 300 MHz spectrometer or a Bruker DRX 500 MHz spectrometer.

MDA-MB-468 breast tumor cells were acquired from the American Type Culture Collection and were maintained as monolayers in DMEM medium supplemented with 10% fetal bovine serum, 100 mM L-glutamine, 100  $\mu$ M streptomycin and 100 U/mL penicillin. Cells were grown at 37°C in an atmosphere of 95% humidified air and 5% CO<sub>2</sub>. Antibodies against Stat3 (Cat# 9132) and pStat3<sup>Y705</sup> (Cat# 9145) were purchased from Cell Signaling Technology (Beverly, MA).

**Synthesis of *tert*-butyl (E)-3-(4-iodophenyl)prop-2-enoate (2):** A solution of *tert*-butyl diethylphosphonoacetate (10.0 g, 39.6 mmol), 4-iodobenzaldehyde (9.20g, 39.6mmol) and cesium carbonate (19.3 g, 59.4 mmol) in dry THF (15 mL) was stirred for 4 h. The solvent was removed *in vacuo*, the residue dissolved in 300 mL EtOAc, and the organic phase was washed with water (2  $\times$  30 mL) followed by brine (1  $\times$  30 mL) and dried (MgSO<sub>4</sub>). After filtration and

concentration, the crude product was purified by silica gel column chromatography eluting with 10% EtOAc-hexanes. A white solid was obtained (**2**, 11.1 g, 86%). <sup>1</sup>H NMR (CDCl<sub>3</sub>, 300 MHz) δ 1.45 (s, 9H), 6.28 (d, 1H, J = 16.0 Hz), 7.15 (d, 2H, J = 8.4 Hz), 7.41 (d, 1H, J = 16.0 Hz), 7.62 (d, 1H, J = 8.4 Hz).

**Synthesis of tert-butyl (E)-3-(4-diethoxyphosphoryldifluoromethylphenyl)prop-2-enoate**

**(3):** To a solution of diethyl bromodifluoromethylphosphonate (6.45 g, 24.1 mmol) in dry DMF (100 mL) was added cadmium powder (5.41 g, 48.2 mmol). The suspension was stirred for 12 h under argon. Excess cadmium was removed by filtration under argon and the filtrate was treated with CuCl (2.86 g, 28.9 mmol) and **2** (5.00 g, 15.1 mmol) for 24 h at rt. Et<sub>2</sub>O (300 mL), was added and the mixture stirred for 5 min and filtered. The organic layer was washed with saturated NH<sub>4</sub>Cl (2 × 40 mL) and water (4 × 40 mL), dried (MgSO<sub>4</sub>) and evaporated to give an oily residue. The crude product was purified by silica gel column chromatography with 40% EtOAc-hexanes as the eluant to give 4.92 g (83%) of **3** as colorless oil. HRMS (M + 1) calcd 391.1486, found 391.1441; <sup>1</sup>H NMR (CDCl<sub>3</sub>, 300 MHz) δ 1.32 (t, 6H, J = 7.2 Hz), 1.54 (s, 9H), 4.11-4.27 (m, 4H), 6.43 (d, 1H, J = 16.0 Hz), 7.56-7.64 (m, 5H). <sup>19</sup>F NMR (CDCl<sub>3</sub>, 282.0 MHz) δ -108.8 (d, J = 115.0 Hz, 2F). <sup>13</sup>C NMR (CDCl<sub>3</sub>, 75 MHz) δ 16.2, 16.3, 28.1, 64.8, 64.9, 80.8, 122.2, 126.8, 127.8, 137.1, 142.1, 165.8.

**Synthesis of pentachlorophenyl (E)-3-(4-diethoxyphosphoryldifluoromethylphenyl)prop-**

**2-enoate (4):** A solution of **7** (4.00 g, 10.2 mmol) in 5 mL dry dichloromethane was treated with 20 mL of trifluoroacetic acid for 1 h at room temperature. The TFA was removed *in vacuo* and residual acid was removed by addition and evaporation of toluene (2 × 10 mL). <sup>1</sup>H NMR (DMSO-d<sub>6</sub>, 300 MHz) δ 1.31 (t, 6H, 6.9 Hz), 3.97-4.1 (m, 4H), 6.54 (d, 1H, J = 16.0 Hz), 7.47-7.57 (m, 3H), 7.76 (d, J = 8.1 Hz, 2H). <sup>19</sup>F NMR (DMSO-d<sub>6</sub>, 282.0 MHz) δ -107.7 (d, J = 122.8



Hz, 2F).  $^{13}\text{C}$  NMR (DMSO- $d_6$ , 75 MHz)  $\delta$  16.5, 16.6, 65.1, 65.2, 121.9, 126.8, 126.9, 128.8, 133.5, 133.7, 137.4, 142.9, 167.7. The crude cinnamic acid derivative (3.5 g, 10.5 mmol), pentachlorophenol (3.1 g, 11.5 mmol), DCC (2.6 g, 12.6 mmol) and DMAP (1.3 g, 1.05 mmol) in 100 mL of EtOAc was stirred at room temperature for 24 h. The mixture was filtered through celite and the solvent removed *in vacuo*. The crude product was purified by silica gel chromatography eluting with 25% EtOAc-hexanes to give 5.1 g (84%) of **4** as a white solid. HRMS (M + 1) calcd 582.9195, found 582.9135;  $^1\text{H}$  NMR ( $\text{CDCl}_3$ , 300 MHz)  $\delta$  1.26 (t, 6H, J = 7.2 Hz), 4.1-4.2 (m, 4H), 6.67 (d, 1H, J = 16.0 Hz), 7.63 (s, 4H), 7.9 (d, J = 16.0 Hz, 1H).  $^{19}\text{F}$  NMR ( $\text{CDCl}_3$ , 282.0 MHz)  $\delta$  -109.06 (d, J = 114.2 Hz, 2F).  $^{13}\text{C}$  NMR ( $\text{CDCl}_3$ , 75 MHz)  $\delta$  16.3, 16.4, 64.9, 65.0, 116.7, 127.1, 127.8, 128.5, 131.6, 132.1, 135.9, 144.2, 147.6, 162.2.

**Synthesis of Pentachlorophenyl (E)-3-(4-phosphoryldifluoromethylphenyl)prop-2-enoate (5):** Iodotrimethylsilane (2.0 mL, 3.7 mmol) in 5 mL of dry  $\text{CH}_2\text{Cl}_2$  was added dropwise to a solution of **4** (2.0 g, 3.43 mmol) and bis(trimethylsilyl)trifluoroacetamide (1.8 mL, 6.8 mmol) in 20 mL of dry  $\text{CH}_2\text{Cl}_2$  at 0°C under argon. Stirring was continued for 1 h at 0°C and 1 h at room temperature. The solution was concentrated *in vacuo*. The residue was taken up in 20 mL MeCN/ $\text{H}_2\text{O}$ /AcOH (8:1:1), stirred for 45 min and concentrated *in vacuo*. Toluene (5 mL) was added and evaporated twice. On addition of ether solids separated, which were collected by filtration and washed with the same solvent to give 1.6 g of **5** as a white powder (89%). HPLC  $t_R$  25.22, HRMS (M + H) calcd 526.8569, found 526.8542.  $^1\text{H}$  NMR (DMSO- $d_6$ , 300 Hz)  $\delta$  7.13 (d, J = 15.9 Hz, 1H), 7.60 (d, J = 8.1 Hz, 2H), 8.0 (d, J = 8.1 Hz, 1H), 8.08 (d, J = 15.9 Hz, 2H).  $^{13}\text{C}$  NMR (DMSO- $d_6$ , 125 MHz)  $\delta$  116.4, 127.2, 127.8, 129.3, 131.2, 131.7, 135.4, 144.3, 148.9, 162.8.  $^{19}\text{F}$  NMR (DMSO- $d_6$ , 282 MHz)  $\delta$  -108.52 (d, 2F, J = 104.3 Hz).

**Synthesis of pentachlorophenyl (E)-3-(4-dipivaloyloxymethylphosphoryl-difluoromethylphenyl)prop-2-enoate (6):** NaOH (144 mg, 3.6 mmol) in 2 mL of water was

added dropwise to a stirred suspension of **5** (1 g, 1.9 mmol) in 5 mL of water. When the mixture became clear (pH~10), AgNO<sub>3</sub> (807 mg, 4.75 mmol) was added. After 2 h at 4°C the gray precipitate was collected by filtration, dried, and pulverized in a mortar and pestle. The powder was suspended in dry toluene (10 mL) and pivaloxymethyl iodide (1.4 g, 5.7 mmol) was added and stirred for 24 h at room temperature. After filtration the solvent was removed *in vacuo* and the crude product was purified by silica gel column chromatography eluting with 30% EtOAc-hexanes to give a colorless sticky liquid of **6** (0.90 g, 64%) which solidified on storage at 4°C. <sup>1</sup>H NMR (CDCl<sub>3</sub>, 500 MHz) δ 1.15 (s, 18H), 5.58 (dd, J = 12.3, 5.0 Hz, 2H), 5.67 (dd, J = 12.3, 5.0 Hz, 2H), 6.68 (d, J = 16.0 Hz, 1H), 7.6-7.64 (m, 4H), 7.9 (d, J = 16.0 Hz, 1H). <sup>13</sup>C NMR (CDCl<sub>3</sub>, 125 MHz) δ 26.7, 38.7, 82.4, 82.5, 117.0, 127.2, 127.8, 128.6, 131.6, 132.1, 136.3, 144.1, 147.4, 162.2, 176.5. <sup>19</sup>F NMR (CDCl<sub>3</sub>, 282 MHz) δ -109.54 (d, J = 123.4 Hz, 2F). <sup>31</sup>P NMR (CDCl<sub>3</sub> 202 MHz) δ 4.65 (m, 1P). Proton Decoupled <sup>31</sup>P NMR (CDCl<sub>3</sub> 202 MHz) δ 4.64 (t, J = 123.2 Hz, 1P). Anal. Calcd for C<sub>28</sub>H<sub>28</sub>Cl<sub>5</sub>F<sub>2</sub>O<sub>9</sub>P: C, 44.56; H, 3.74; Cl, 23.49; F, 5.03. Found: C, 44.60; H, 3.76; Cl, 23.46; F, 4.95. HRMS (M + Na) calcd 776.9750, found 776.9718.

**Synthesis of TFA-H-Haic-Gln-NHBn (7):** Fmoc-Haic-Gln-NHBn was prepared on solid phase using 0.300 g (0.36 mmol) of rink resin as described by Mandal et al.<sup>3</sup> The Fmoc group was removed by treatment with 20% piperidine/DMF and the resin then treated with 3 × 10 mL of trifluoroacetic acid: triisopropylsilane: H<sub>2</sub>O (TFA:TIS:H<sub>2</sub>O) (95:2.5:2.5 v/v/v)<sup>4</sup> and filtered. The combined filtrates were evaporated to ca 5 mL and the product was isolated by precipitation in Et<sub>2</sub>O and collected by centrifugation. The crude peptide was purified by reverse phase HPLC, using 0.1% TFA-water/acetonitrile, lyophilized, and dried *in vacuo* over P<sub>2</sub>O<sub>5</sub> at 37°C to get 106 mg of a white solid. HPLC t<sub>R</sub>16.28, (Purity, 100% at 230 nm, 95% at 275 nM). LC-MS (M + H) calcd 464.2298, found 464.1441. <sup>1</sup>H NMR (DMSO-d<sub>6</sub> 500 MHz) δ 1.78-1.83 (m, 1H), 1.86-1.94 (m, 1H), 2.03-2.19 (m, 4H), 2.96 (d, J = 15.0 Hz, 1H), 3.14 (m, 2H), 3.44 (m, 1H), 4.22 (m, 2H),

4.28 (t, J = 6.0 Hz, 1H), 5.17 (dd, J = 2.5, 11.0 Hz, 1H), 6.8 (s, 1H), 7.02 (t, J = 7.5Hz, 1H), 7.08 (d, J = 7.5 Hz, 1H), 7.12 (d, J = 7.5 Hz, 1H), 7.21 -7.25 (m, 3H), 7.28-7.30 (m, 2H), 8.36 (m, 2H), 8.43 (m, 2H).  $^{13}\text{C}$  NMR (DMSO- $d_6$  125 MHz)  $\delta$  28.5, 31.2, 31.9, 32.3, 52.9, 60.8, 124.4, 127.3, 127.5, 128.7, 171.1, 171.52.

**Preparation of BP-PM6:** To a stirred solution of **7** (0.050 g, 0.086 mmol), NMM (0.03 mL, 0.26 mmol) and DMAP (0.005 g, 0.04 mmol) in 2 mL of anhydrous NMP was added a solution of **6** (0.070 g, 0.091 mmol) in 2 mL of dry  $\text{CH}_2\text{Cl}_2$  under argon. The reaction was monitored by HPLC. After completion, about 2 h, the reaction mixture was concentrated under vacuum and triturated with hexane-ether. The solid residue (0.102 g) was taken up in 2 mL of MeCN and purified by reverse phase HPLC using a gradient of MeCN in  $\text{H}_2\text{O}$  (no TFA in the eluant). Yield: 0.060 g (72%). HPLC  $t_{\text{R}}$ 25.80 (purity>98%), HRMS (M + H) calcd 952.3709, found 952.3412.  $^{19}\text{F}$  NMR (Acetone- $d_6$  282 MHz)  $\delta$  -108.0 (d, J =123.0, 2F). Proton Decoupled  $^{31}\text{P}$  NMR (Acetone- $d_6$  202 MHz)  $\delta$  4.1 (tr, J = 123.0 Hz, 1P).  $^1\text{H}$  NMR (Acetone- $d_6$  500 MHz)  $\delta$  1.2 (s, 18H), 1.95-2.00 (m, 1H), 2.1-2.2 (m, 1H), 2.24-2.34 (m, 4H), 3.13-3.22 (m, 3H), 3.5 (m, 1H), 4.4 (d, J = 5.5Hz, 2H), 4.44 (m, 1H), 4.65-4.7 (m, 1H), 5.24 (m, 1H), 5.72-5.8 (m, 4H), 6.95-7.02 (m, 2H), 7.1 (m, 1H), 7.2-7.21 (m, 0.8H), 7.25-7.28 (m, 3H), 7.6-7.66 (m, 3H), 7.8 (d, J = 8.0 Hz, 1H), 8.2 (d, J = 8.0Hz, 1H), 8.28 (t, J = 6.0 Hz, 1H), 8.4 (d, J = 7.0 Hz, 0.2 H).  $^{13}\text{C}$  NMR (Acetone- $d_6$  125 MHz)  $\delta$  26.1, 27.9, 30.8, 31.3, 38.4, 42.5, 52.8, 53.7, 61.6, 82.7, 123.2, 123.6, 124.3, 126.5, 126.9, 127.3, 128.1, 128.4, 129.5, 132.8, 138.5, 138.9, 139.0, 165.0, 170.4, 171.5, 171.7, 175.5, 176.3.

**Synthesis of TFA-H-Leu-Pro-Gln-NHBn (8):** Fmoc-Leu-Pro-Gln-NHBn was prepared on solid phase using 0.200 g (0.24 mmol) of rink resin as described by Mandal et al.<sup>3</sup> The Fmoc group was removed by treatment with 20% piperidine/DMF and the peptide was cleaved and isolated as in the case of TFA-H-Haic-Gln-NHBn. The crude peptide was purified by reverse phase

HPLC, using a gradient of 0.1%TFA-water/acetonitrile, to get 88 mg of white solid after drying *in vacuo* over P<sub>2</sub>O<sub>5</sub> at 37°C for 24 hr. HPLC *t<sub>R</sub>*9.17, (Purity, 95%) HRMS (M + H) calcd 446.2767, found 446.3924. <sup>1</sup>H NMR (DMSO-d<sub>6</sub> 500 MHz) δ 0.9-0.95 (m, 7H), 1.55 (m, 2H), 1.78-1.98 (m, 7H), 2.01-2.13 (m, 3H), 3.42 (m, 1H), 3.72 (m, 1H), 4.12 (m, 1H), 4.22 (m, 1H), 4.28-4.3 (m, 2H), 4.42-4.45(m 1H), 6.8 (s, 1H), 7.23-7.33 (m, 7H), 8.15-8.2 (m, 4H), 8.37 (m, 1H). <sup>13</sup>C NMR (DMSO-d<sub>6</sub> 125 MHz) δ 21.6, 23.6, 23.8, 25.1, 28.4, 29.5, 31.9, 42.5, 47.3, 49.9, 53.0, 60.1, 127.2, 127.5, 128.7, 139.8, 158.4, 158.7,168.2, 171.3, 171.6, 174.3.

**Preparation of BP-PM279G:** To a stirred solution of **8** (0.042 g, 0.075 mmol), NMM (0.025 mL, 0.22 mmol) and DMAP (0.005 g, 0.04 mmol) in 5 mL of 50:50 anhydrous MeCN/CH<sub>2</sub>Cl<sub>2</sub>, was added **6** (0.060 g, 0.078 mmol) under inert atmosphere. The reaction was monitored by HPLC. After completion, about 2 h, the reaction mixture was concentrated under vacuum and triturated with ether. The solid residue (0.092 g) was taken up in 2 mL of MeCN and purified by reverse phase HPLC using a gradient of MeCN in H<sub>2</sub>O (no TFA in the eluant). Yield: 53 mg (75%). HPLC *t<sub>R</sub>*26.29 (purity >98%), HRMS (M + H) calcd 934.4179, found 934.4190. <sup>19</sup>F NMR (Acetone-d<sub>6</sub> 282 MHz) δ -109.43 (d, J =124.0, 2F). Proton Decoupled <sup>31</sup>P NMR (Acetone-d<sub>6</sub> 202 MHz) δ 4.3 (t, J = 121.0 Hz, 1P). <sup>1</sup>H NMR (Acetone-d<sub>6</sub> 500 MHz) δ 0.93 (d, J = 6.0 Hz, 3H), 0.97 (d, J = 6.0 Hz, 3H), 1.22 (s, 18H), 1.53-1.58 (m, 1H), 1.67--1.74 (m, 2H), 1.93-2.0 (m, 2H), 2.18-2.23 (m, 1H), 2.3-2.4 (m, 2H), 3.85 (m, 1H), 3.94 (m, 1H), 4.3-4.37 (m, 3H), 4.43-4.49 (m, 1H), 4.93 (m, 1H), 5.72-5.81 (m, 4H), 6.5 (s, 0.5H), 6.9 (d, J = 16.0 Hz, 1H), 7.14 (s, 0.5), 7.23 ( t, J = 7.0 Hz, 1H), 7.27-7.35 (m, 4H), 7.57 (d, J = 7.5 Hz, 1H), 7.62-7.7 (m, 4H), 7.77 (d, J = 8.0 Hz, 2H), 7.86 (m, 1H), 8.21(d, J = 7.0 Hz, 1H). <sup>13</sup>C NMR (Acetone-d<sub>6</sub> 125 MHz) δ 21.1, 22.8, 24.5, 24.9, 26.1, 26.7, 31.5, 38.4, 40.4, 42.4, 47.4, 49.7, 53.5, 61.6, 82.6, 123.6, 126.6, 126.8, 127.2, 127.3, 127.9, 128.2, 138.2, 138.7, 139.7, 164.6, 171.1, 171.5, 172.4, 175.5, 176.0.

**Synthesis of F2PmCinn-Haic-Gln-NHBn (NP-PM6):** Fmoc-Haic-Gln-NHBn was assembled on 0.2 g (0.12 mmol) of Rink resin using the general procedures described above. Compound **5** (0.095 g, 0.18 mmol), HOBt (0.027 g, 0.18 mmol) and DIEA (31  $\mu$ L, 0.18 mmol) in 5 mL of DMF was added. After 3 hr the ninhydrin test was negative. The peptide was cleaved from the resin with trifluoroacetic acid: triisopropylsilane: H<sub>2</sub>O (95:2.5:2.5 v/v/v) and purified as above to give 43 mg of final peptide. T<sub>R</sub> (min.) (0.1%TFA/MeCN-H<sub>2</sub>O): 13.64 (Purity: > 99%). HRMS (M+H) Cald: 724.2348. Found 724.2620. <sup>1</sup>H NMR (DMSO-*d*<sub>6</sub> 500 MHz)  $\delta$  1.38-1.48 (m, 2H), 1.67 (m, 1H), 1.80 (m, 1H), 1.98-2.04 (m, 4H), 2.87 (d, J = 16.0 Hz, 1H), 2.95-3.06 (m, 2H), 3.32 (m, 2H), 4.12-4.22 (m, 3H), 4.42 (m, 1H), 5.03 (d, J = 8.5 Hz, 1H), 6.66 (s, 1H), 6.8 (d, J = 15.5 Hz, 1H), 6.88 (t, J = 7.0 Hz, 1H), 6.99 (m, 1H), 7.11-7.2 (m, 5H), 7.36 (d, J = 16.0 Hz, 1H), 7.48 (s, 4H), 8.18 (d, J = 8.0 Hz, 1H), 8.32 (m, 1H), 8.50 (d, J = 7.0 Hz, 1H). <sup>13</sup>C NMR (DMSO-*d*<sub>6</sub> 125 MHz)  $\delta$  22.4, 22.7, 28.5, 29.5, 31.5, 31.9, 32.1, 42.5, 44.1, 52.9, 53.4, 61.0, 123.0, 124.0, 125.9, 127.1, 127.2, 127.5, 128.7, 129.7, 133.1, 135.7, 139.1, 139.4, 139.7, 164.9, 169.6, 171.0, 171.6, 174.1. <sup>31</sup>P NMR (DMSO-*d*<sub>6</sub> 202 MHz)  $\delta$  0.59 (t, J = 90.9 Hz, 1P).

**Synthesis of MP-PM6:** From failed solid phase synthesis of **BP-PM6**. 22 mg of desired material was obtained after HPLC purification. T<sub>R</sub> (min) (0.1%TFA/MeCN-H<sub>2</sub>O): 19.78 (Purity: > 97%). HRMS (M+H) Cald: 838.3029. Found 838.3032. <sup>1</sup>H NMR (DMSO-*d*<sub>6</sub> 500 MHz)  $\delta$  1.06 (s, 9H), 1.68 (m, 1H), 1.80 (m, 1H), 1.94-2.08 (m, 4H), 2.87 (d, J = 16.5 Hz, 1H), 2.95-3.1 (m, 2H), 3.35 (m, 1H), 4.11-4.22 (m, 3H), 4.43 (t, J = 8.0 Hz, 1H), 5.04 (m, 1H), 5.38 (d, J = 11.5 Hz, 2H), 6.84 (d, J = 16.0 Hz, 1H), 6.9 (t, J = 7.0 Hz, 1H), 7.00 (t, J = 8.0 Hz, 1H), 7.11-7.21 (m, 5H), 7.38 (d, J = 16.0 Hz, 1H), 7.47 (d, J = 8.0 Hz, 2H), 7.55 (d, J = 8.0 Hz, 2H), 8.15 (d, J = 8.0 Hz, 1H), 8.3 (t, J = 6.0 Hz, 1H), 8.51 (d, J = 7.5 Hz, 1H). <sup>13</sup>C NMR (DMSO-*d*<sub>6</sub> 125 MHz)  $\delta$  27.1, 28.5, 29.5, 31.5, 31.8, 38.6, 42.5, 52.8, 53.4, 54.6, 61.0, 83.4, 117.9, 123.5, 125.9, 127.2, 127.5, 128.7,

129.7, 133.1, 136.7, 138.7, 139.4, 139.7, 169.6, 171.6, 174.1, 176.8, 197.7. <sup>31</sup>P NMR (DMSO-*d*<sub>6</sub> 202 MHz)  $\delta$  0.61 (t, J = 101.0 Hz, 1P).

### **Inhibition of Stat3 tyrosine 705 phosphorylation in MDA-MB-468 cells.**

MDA-MB-468 breast tumor cells ( $0.4 \times 10^6$ ) were plated onto 35 mm culture dishes and were allowed to grow overnight. Prodrugs were prepared as 10 mM stock solutions in DMSO and aliquots were added to the culture media to give the correct final concentrations. After 2 h the cells were washed with ice cold phosphate buffered saline. Washed cells were treated with lysis buffer (50 mM Hepes, pH 7.4, 150 mM NaCl, 1.5 mM MgCl<sub>2</sub>, 1 mM EGTA, 100 mM NaF, 10 mM sodium pyrophosphate, 10% glycerol, 1% Triton X-100, 1 mM PMSF, 1 mM Na<sub>3</sub>VO<sub>4</sub>, 10  $\mu$ g/mL leupeptin and 10  $\mu$ g/mL aprotinin). Cell-free detergent extracts were centrifuged at 15,000 rpm in a microcentrifuge for 30 min at 4°C and the protein concentrations of the supernatants determined. Aliquots containing 12  $\mu$ g of protein were separated on 8% SDS-PAGE and were transferred to PVDF filters. The filters were blocked with 5% bovine serum albumin and were probed with pStat3<sup>Y705</sup> antibody followed by secondary antibody, whose signal was detected with an enhanced chemiluminescence kit (ECL, Amersham, Chicago, IL). Filters were stripped with stripping buffer (62.5 mM Tris, pH 6.8, 2% SDS, and 0.1 M 2-mercaptoethanol) at 50°C for 30 min. Filters were then probed with total Stat3 antibody and visualized with chemiluminescence as above.

### **References for the Supporting Information**

- (1) De Lombaert, S.; Blanchard, L.; Stamford, L. B.; Sperbeck, D. M.; Grim, M. D.; Jenson, T. M.; Rodriguez, H. R. *Tetrahedron Letters* **1994**, *35*, 7513-7516.
- (2) Coleman, D. R. t.; Ren, Z.; Mandal, P. K.; Cameron, A. G.; Dyer, G. A.; Muranjan, S.; Campbell, M.; Chen, X.; McMurray, J. S. *J Med Chem* **2005**, *48*, 6661-70.
- (3) Mandal, P. K.; Limbrick, D.; Coleman, D. R.; Dyer, G. A.; Ren, Z.; Birtwistle, J. S.; Xiong, C.; Chen, X.; Briggs, J. M.; McMurray, J. S. *J Med Chem* **2009**, *52*, 2429-42.
- (4) Pearson, D. A.; Blanchette, M.; Baker, M. L.; Guindon, C. A. *Tetrahedron Letters* **1989**, *30*, 2739-2742.

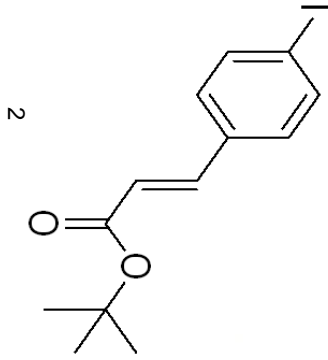

- 7.642
- 7.614
- 7.439
- 7.386
- 7.188
- 7.168
- 7.161
- 7.133
- 6.313
- 6.260

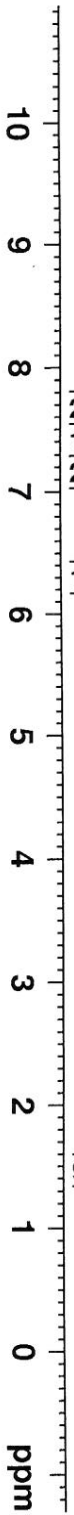

1.453

9.09

2.00  
1.03  
2.18

1.00

Current Data Parameters  
 NAME BPPM-6\_01  
 EXPNO 1  
 PROCNO 1

F2 - Acquisition Parameters  
 Date\_ 20090417  
 Time 12.45  
 INSTRUM spect  
 PROBHD 5 mm QNP 1H/19  
 PULPROG zg30  
 TD 65536  
 SOLVENT CDCl3  
 NS 8  
 DS 2  
 SWH 6172.839  
 FIDRES 0.094190  
 AQ 5.3084660  
 RG 161.3  
 DW 81.000  
 DE 6.00  
 TE 301.2  
 D1 1.00000000  
 TDO 1

==== CHANNEL F1 ====  
 NUCL1 1H  
 P1 10.25  
 PLL -1.00  
 SFO1 300.1318534

F2 - Processing Parameters  
 SI 32768  
 SF 300.1300275  
 WDM EM  
 SSB 0  
 LB 0.30  
 GB 0  
 PC 1.00

S11

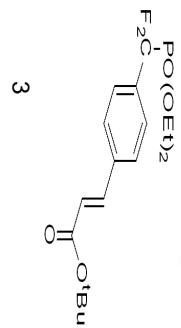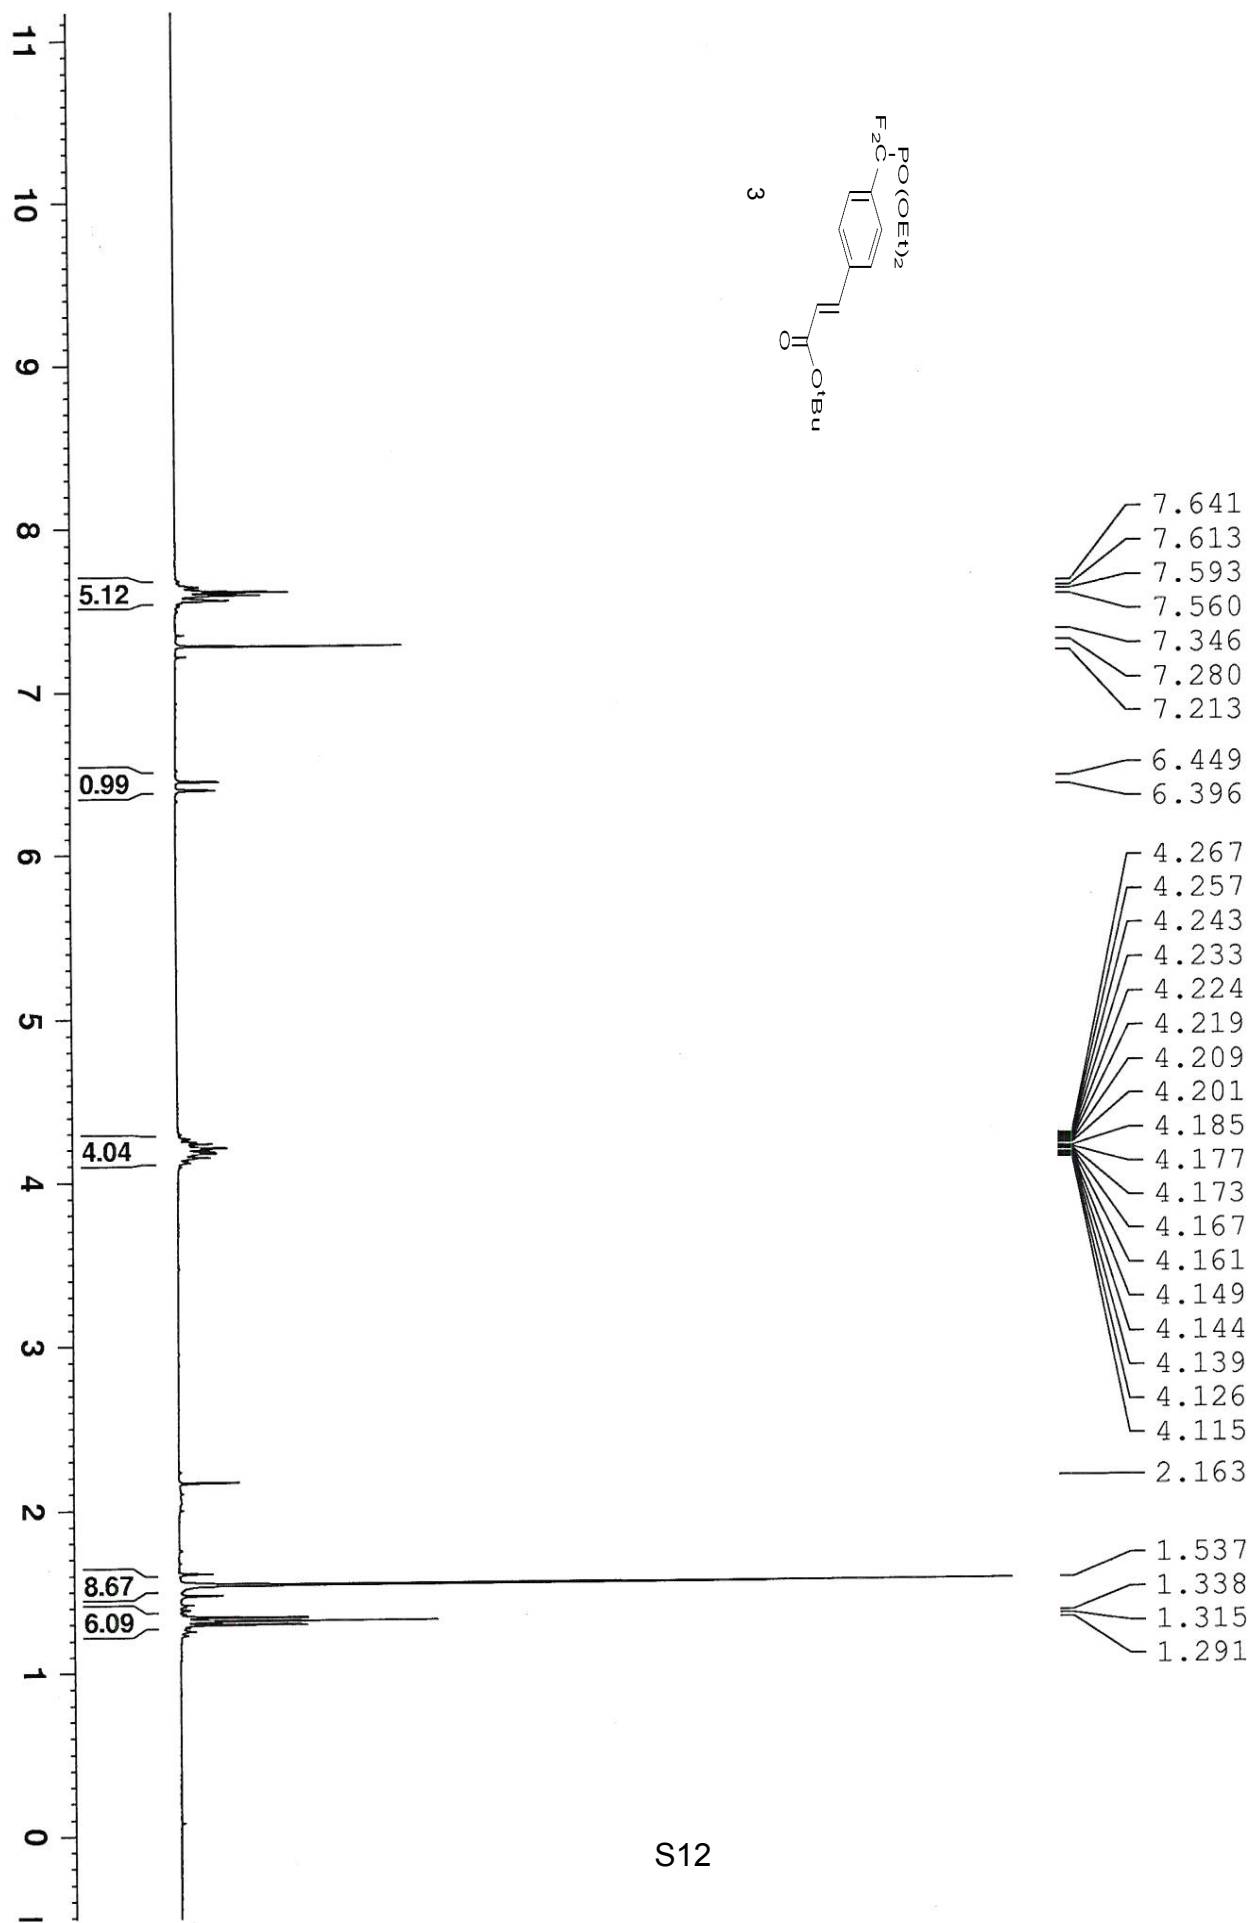



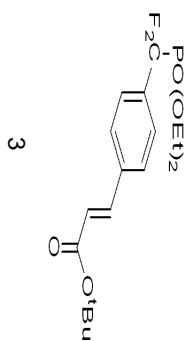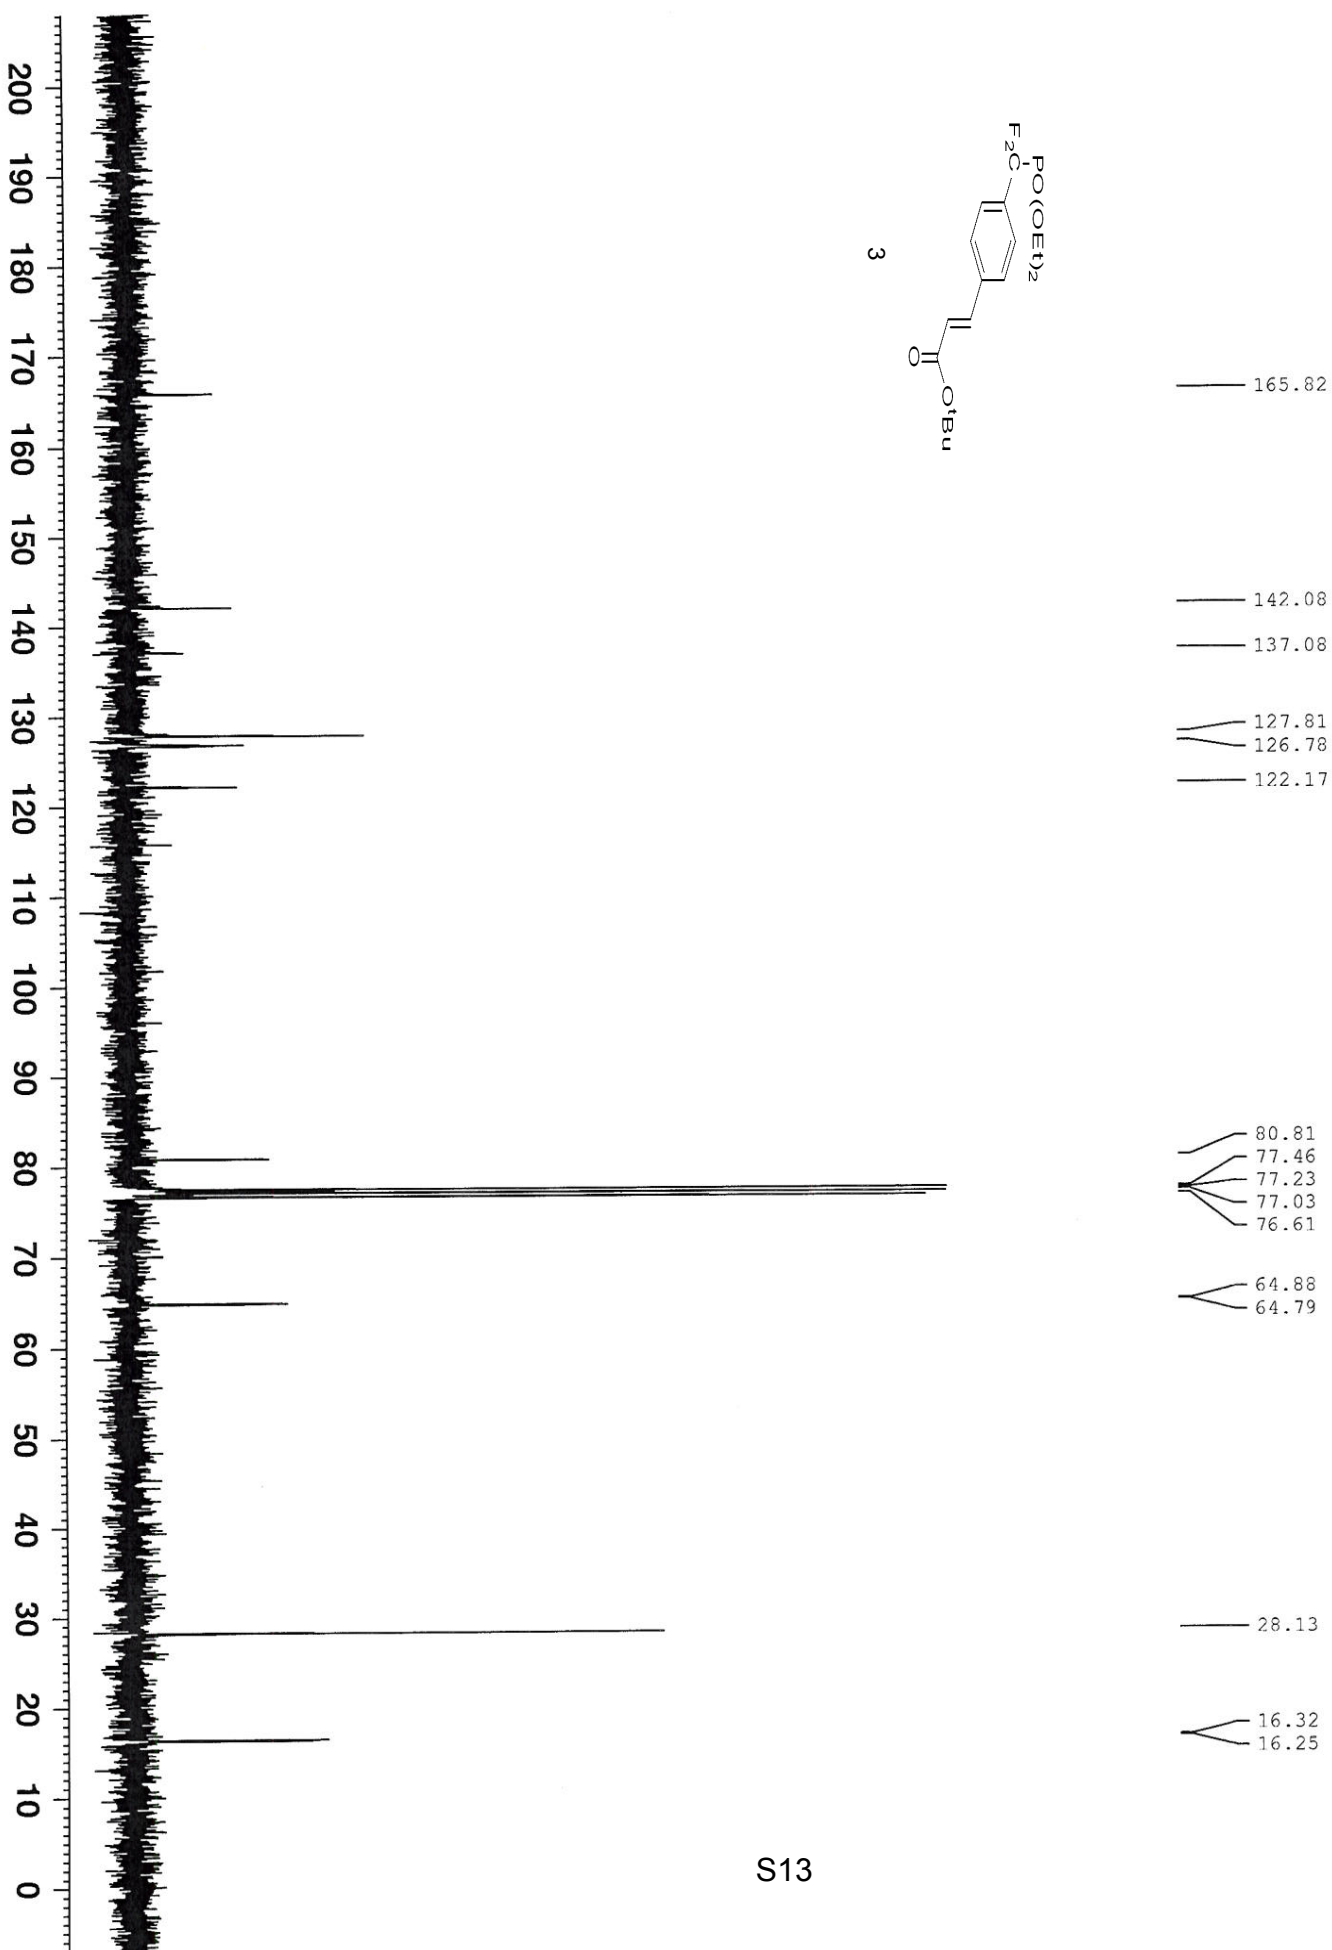

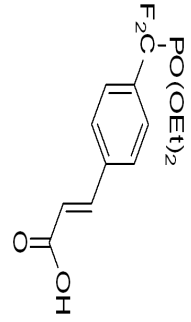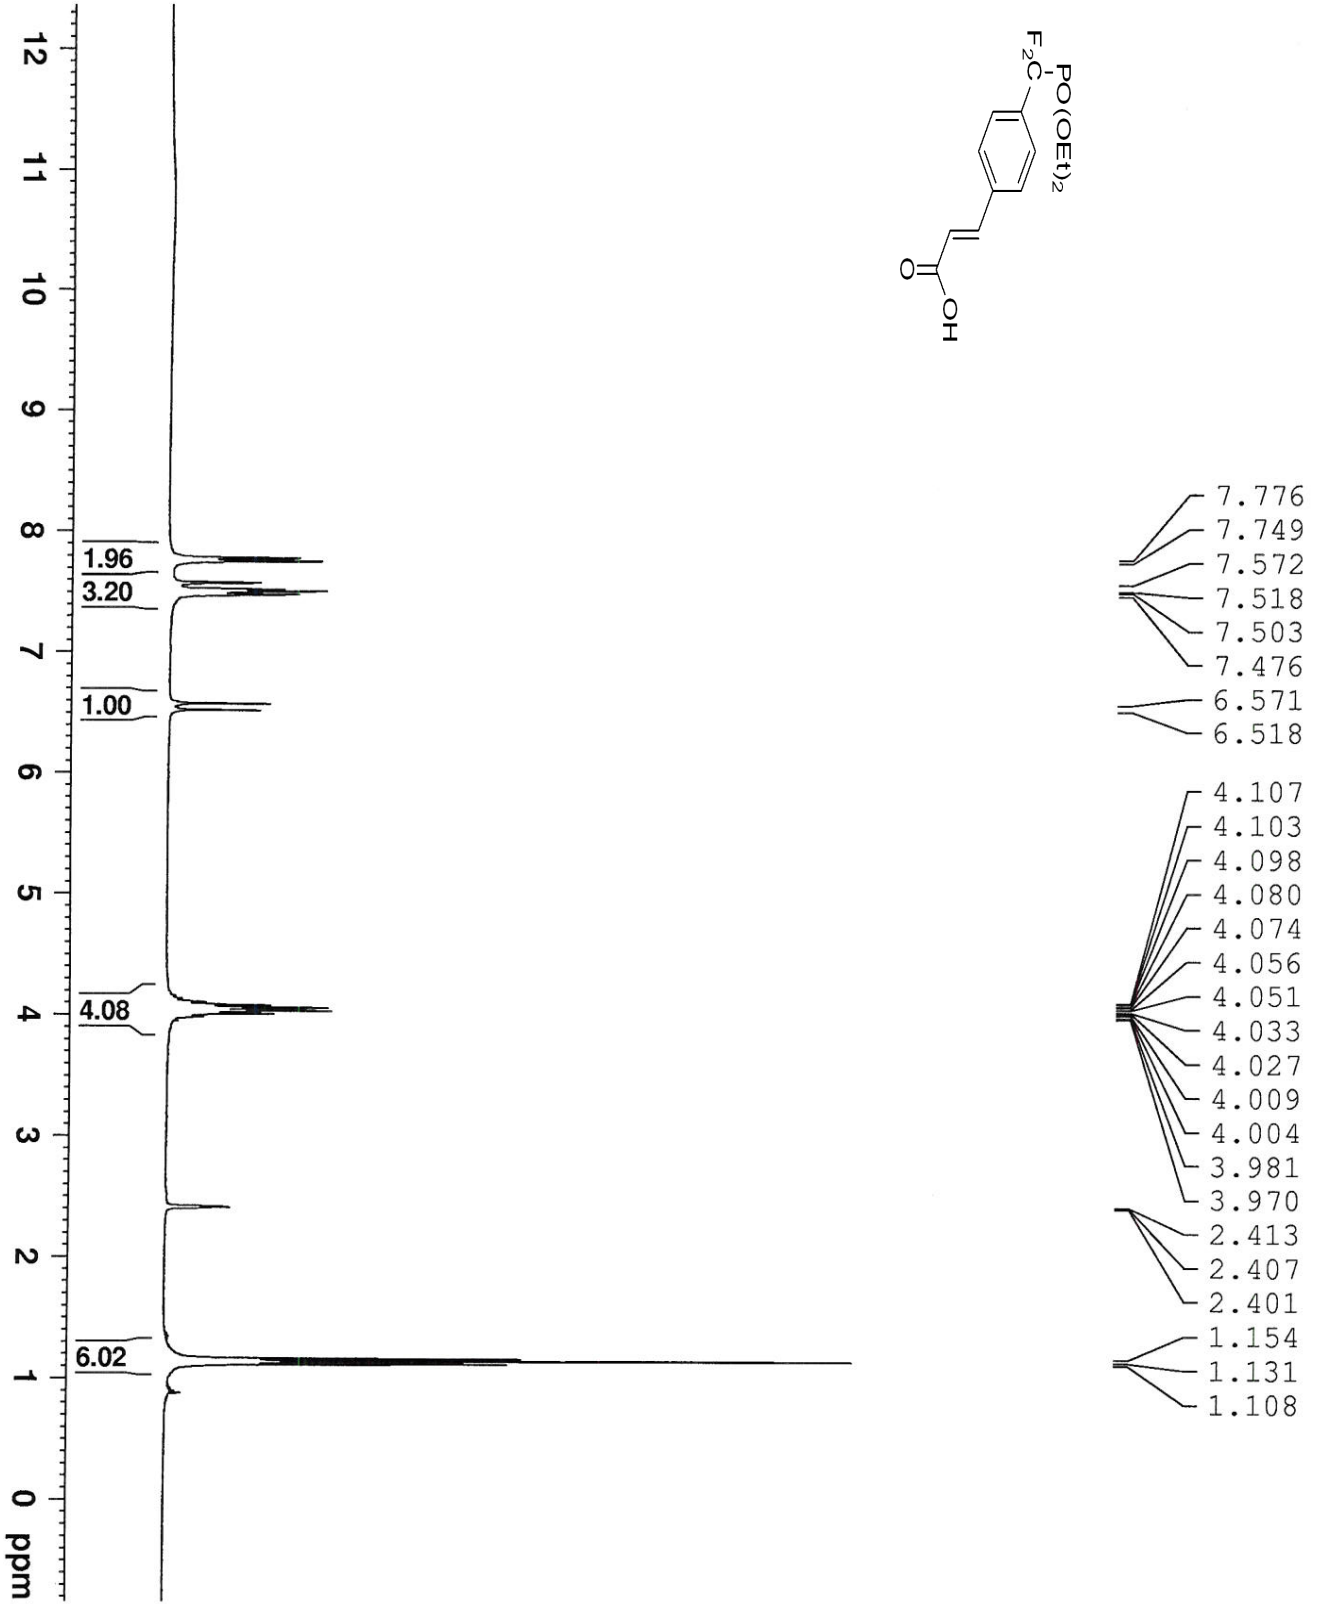

Current Data Parameter  
 NAME BPFM-6\_LC  
 EXPNO  
 PROCNO  
 F2 - Acquisition Param  
 Date\_ 2009041  
 Time 12.5  
 INSTRUM spec  
 PROBD 5 mm QNP 1H/1  
 PULPROG zg3  
 TD 6553  
 SOLVENT DMS  
 NS  
 DS  
 SWH 6172.83  
 FIDRES 0.09419  
 AQ 5.308466  
 RG 161.  
 DW 81.00  
 DE 6.0  
 TE 301.  
 D1 1.00000000  
 TDO

===== CHANNEL f1 =====  
 NUCL 1  
 P1 10.2  
 PL1 -1.0  
 SFO1 300.131853

F2 - Processing param  
 SI 3276  
 SF 300.130027  
 WDW E  
 SSB 0.3  
 LB GB  
 GB 1.0  
 PC

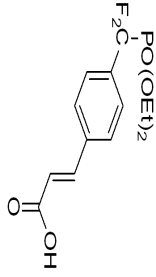

- 167.71
- 142.90
- 137.41
- 133.70
- 133.52
- 128.80
- 126.90
- 126.81
- 121.92
- 65.23
- 65.14
- 40.81
- 40.53
- 40.25
- 39.97
- 39.69
- 39.42
- 39.14
- 16.62
- 16.55

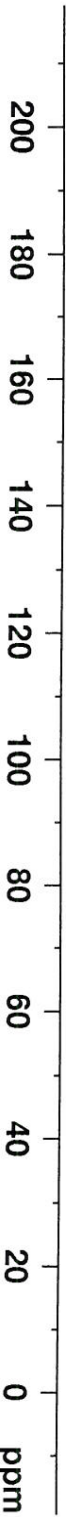

Current Data Parameters  
 NAME BPPM-6\_OL  
 EXPNO 4  
 PROCNO 1

F2 - Acquisition Parameters  
 Date\_ 20090417  
 Time 13.07  
 INSTRUM spect  
 PROBHD 5 mm QNP 1H/19  
 PULPROG zgpg30  
 TD 65536  
 SOLVENT CDCl3  
 NS 735  
 DS 4

SWH 17985.611 Hz  
 FIDRES 0.274439 Hz  
 AQ 1.8219508 sec  
 RG 645.1  
 DW 27.800 use  
 DE 6.00 use  
 TE 301.2 K  
 D1 2.00000000 sec  
 d11 0.03000000 sec  
 DELTA 1.89999998 sec  
 TD0 1

==== CHANNEL f1 =====  
 NUC1 13C  
 P1 10.00 use  
 PL1 1.30 dB  
 SF01 75.4752953 MHz

==== CHANNEL f2 =====  
 CPDPRG2 waltz16  
 NUC2 1H  
 PCPD2 100.00 use  
 PL2 -1.00 dB  
 PL12 19.00 dB  
 PL13 19.00 dB  
 SF02 300.1312005 MHz

F2 - Processing Parameters  
 SI 32768  
 SF 75.4677490 MHz  
 WDW EM  
 SSB 0  
 LB 1.00 Hz  
 GB 0  
 PC 1.40

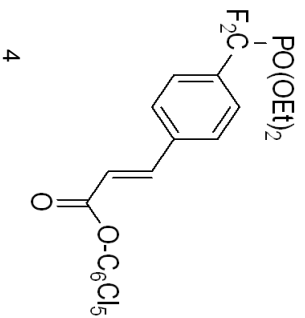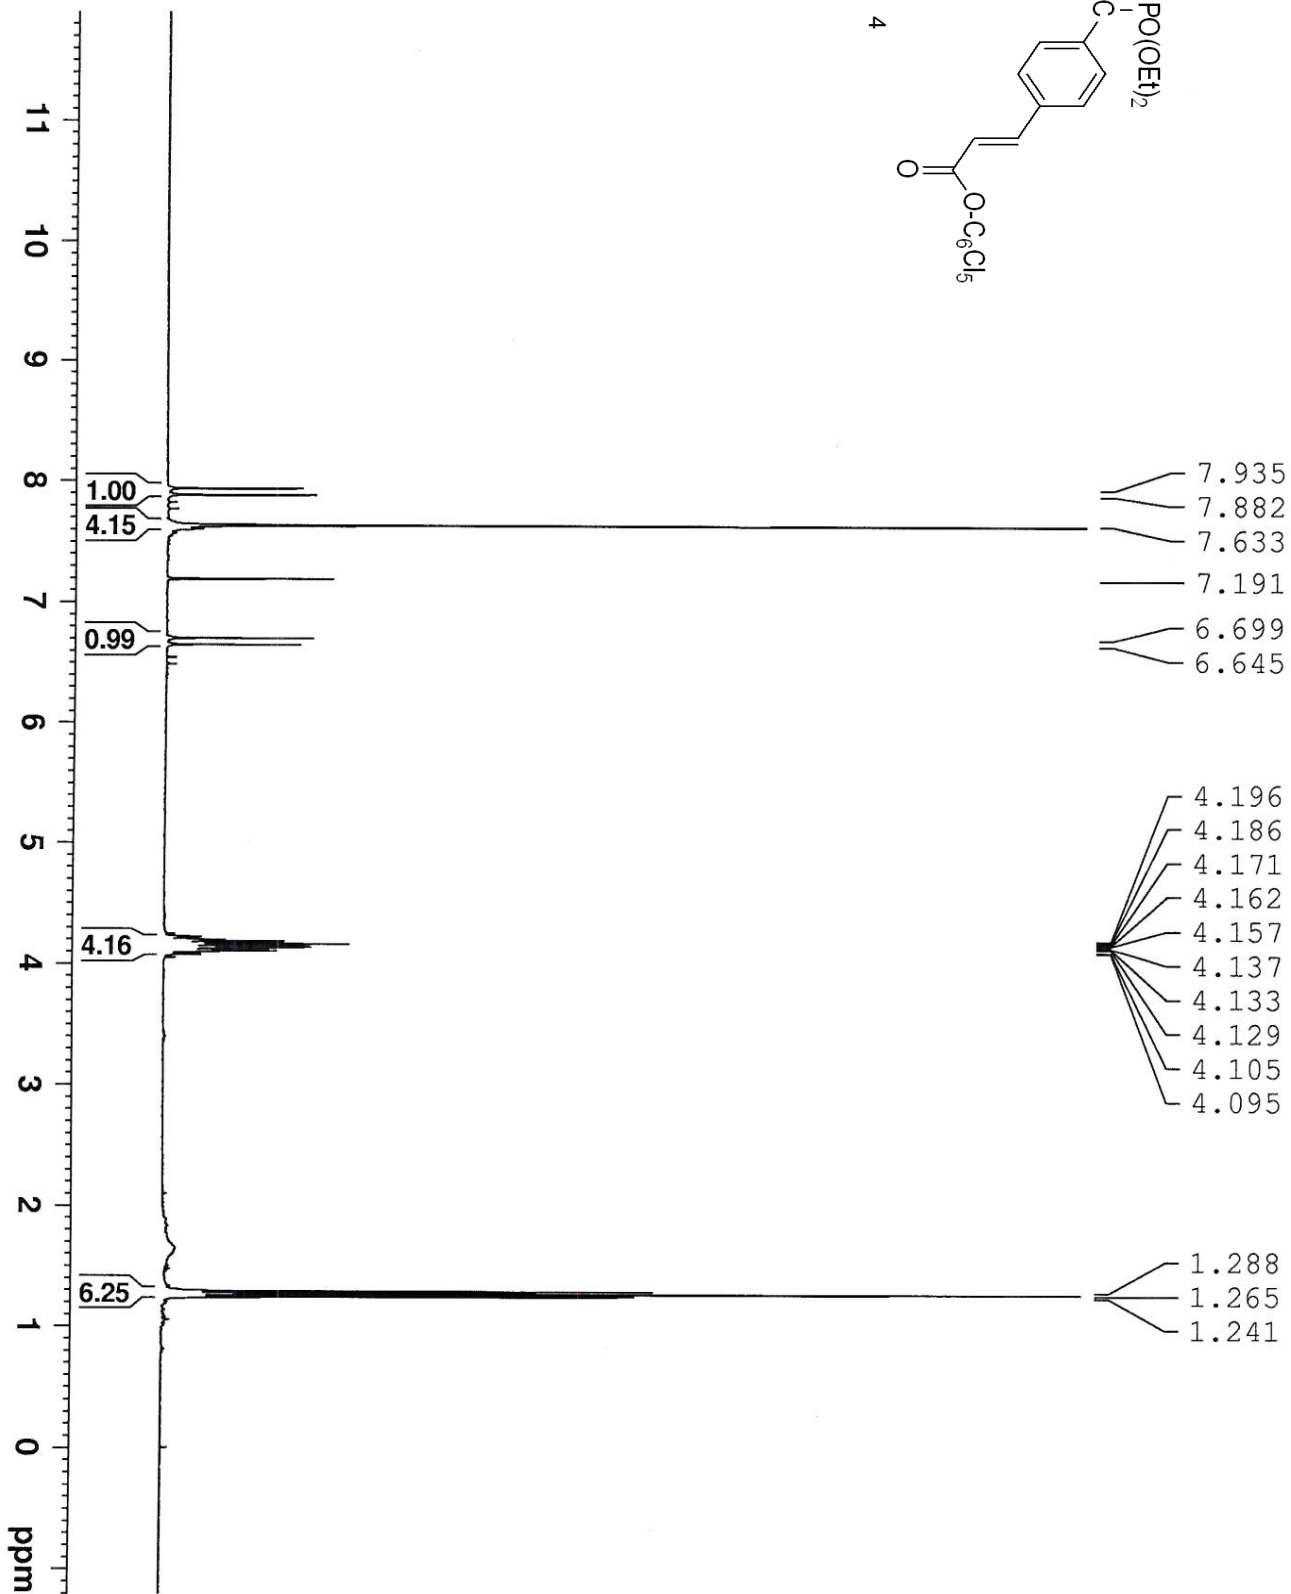

Current Data Parameters  
 NAME DEDFP\_C\_P\_OL-1  
 EXPNO 1  
 PROCNO 1

F2 - Acquisition Parameters  
 Date\_ 20090417  
 Time 15.41  
 INSTRUM spect  
 PROBHD 5 mm QNP 1H/19  
 PULPROG zg30  
 TD 65536  
 SOLVENT CDCl3  
 NS 4  
 DS 2  
 SWH 6172.839  
 FIDRES 0.094190  
 AQ 5.3084660  
 RG 362  
 DW 81.000  
 DE 6.00  
 TE 300.2  
 D1 1.00000000  
 TD0 1

===== CHANNEL f1 =====  
 NUCL 1H  
 P1 10.25  
 PL1 -1.00  
 SFO1 300.1318534

F2 - Processing parameters  
 SI 32768  
 SF 300.1300268  
 WDW EM  
 SSB 0  
 LB 0.30  
 GB 0  
 PC 1.00

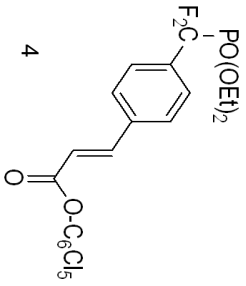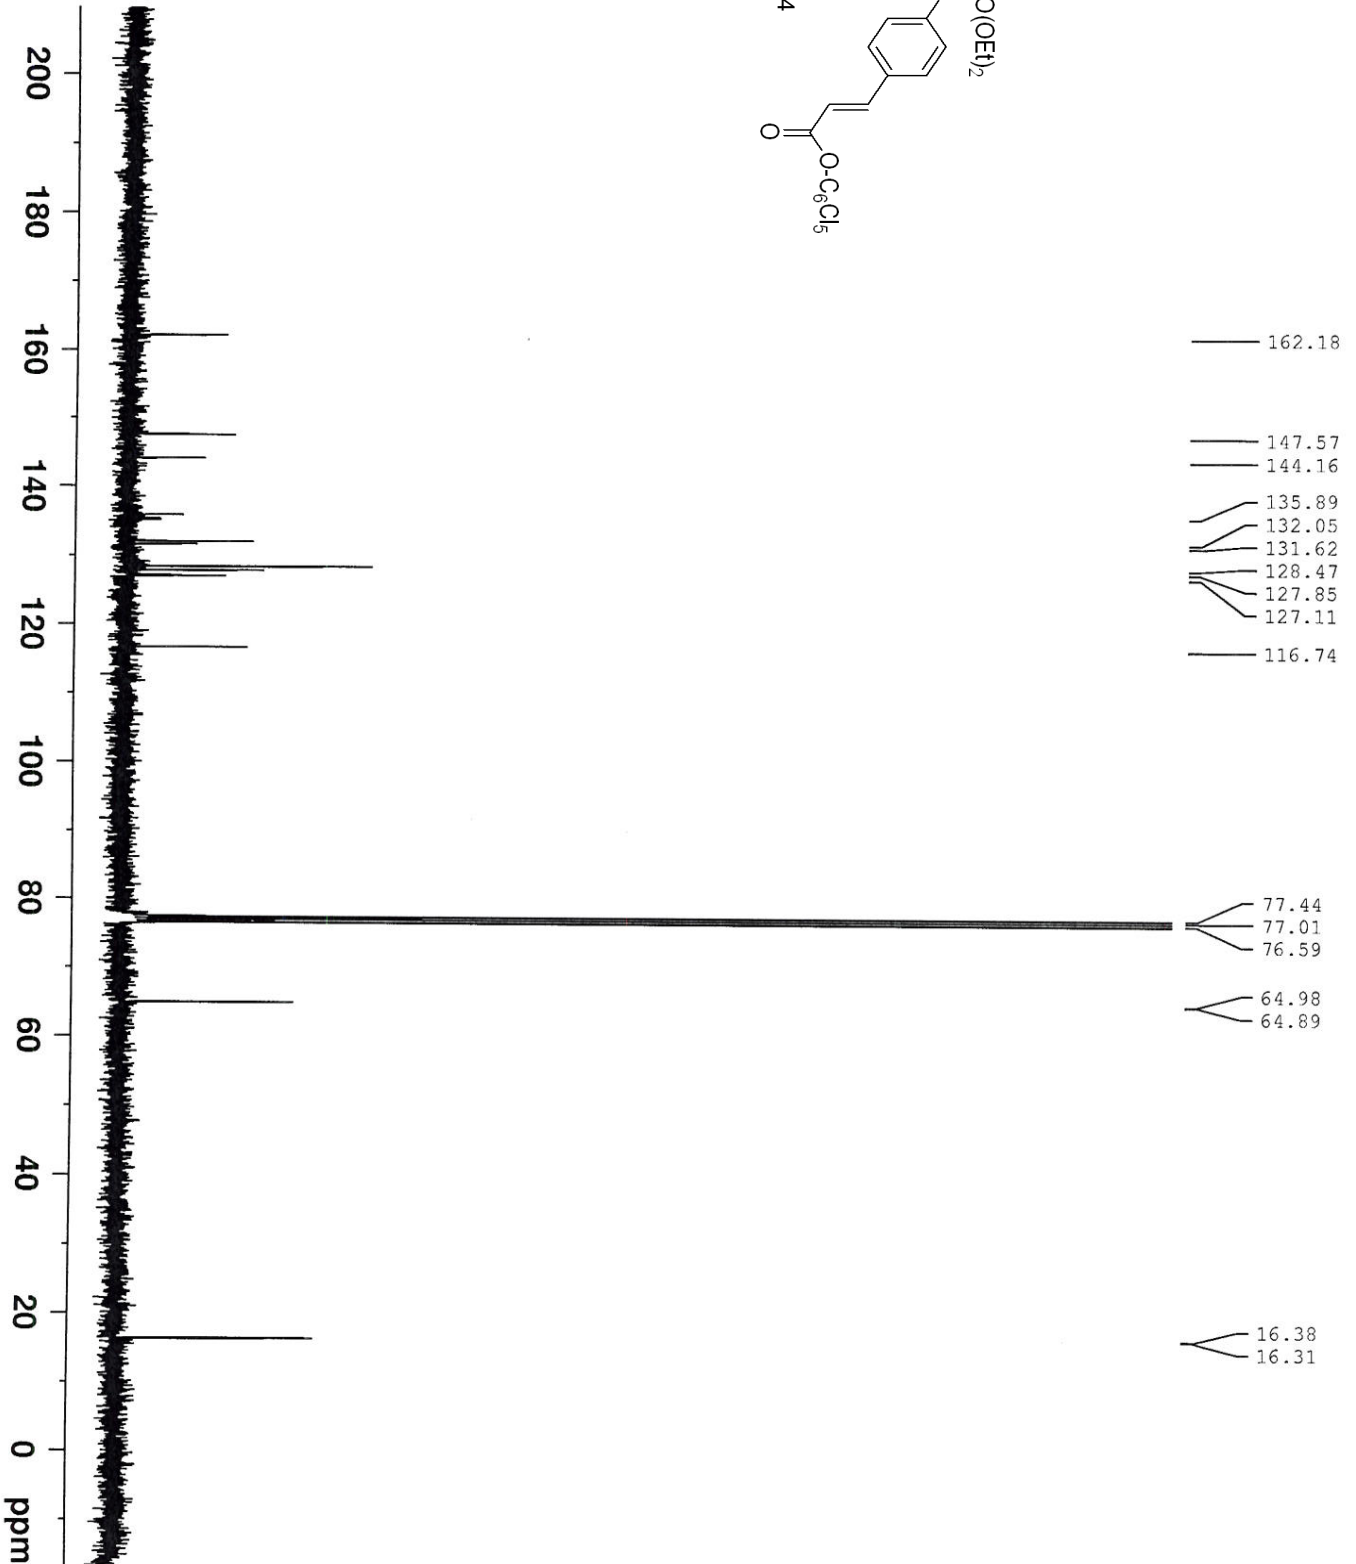

- 162.18
- 147.57
- 144.16
- 135.89
- 132.05
- 131.62
- 128.47
- 127.85
- 127.11
- 116.74
- 77.44
- 77.01
- 76.59
- 64.98
- 64.89
- 16.38
- 16.31

Current Data Parameters  
 NAME DEDFPCP\_OI-1  
 EXPNO 3  
 PROCNO 1

F2 - Acquisition Parameters  
 Date\_ 20090417  
 Time 16.51  
 INSTRUM spect  
 PROBHD 5 mm QNP 1H/19  
 PULPROG zgpg30  
 TD 65536  
 SOLVENT CDCl3  
 NS 1024  
 DS 4  
 SWH 17985.611  
 FIDRES 0.274439  
 AQ 1.8219508  
 RG 456.1  
 DW 27.800  
 DE 6.00  
 TE 301.2  
 D1 2.00000000  
 d11 0.03000000  
 DELTA 1.899999998  
 TDC 1

==== CHANNEL #1 ====  
 NUC1 13C  
 P1 10.00  
 PL1 1.30  
 SFO1 75.4752953

==== CHANNEL #2 ====  
 CPDPRG2 waltz16  
 NUC2 1H  
 PCPD2 100.00  
 PL2 -1.00  
 PL12 19.00  
 PL13 19.00  
 SFO2 300.1312005

F2 - Processing parameters  
 SI 32768  
 SF 75.4677490  
 WDW EM  
 SSB 0  
 LB 1.00  
 GB 0  
 PC 1.00

-104 -106 -108 -110 -112 -114 ppm

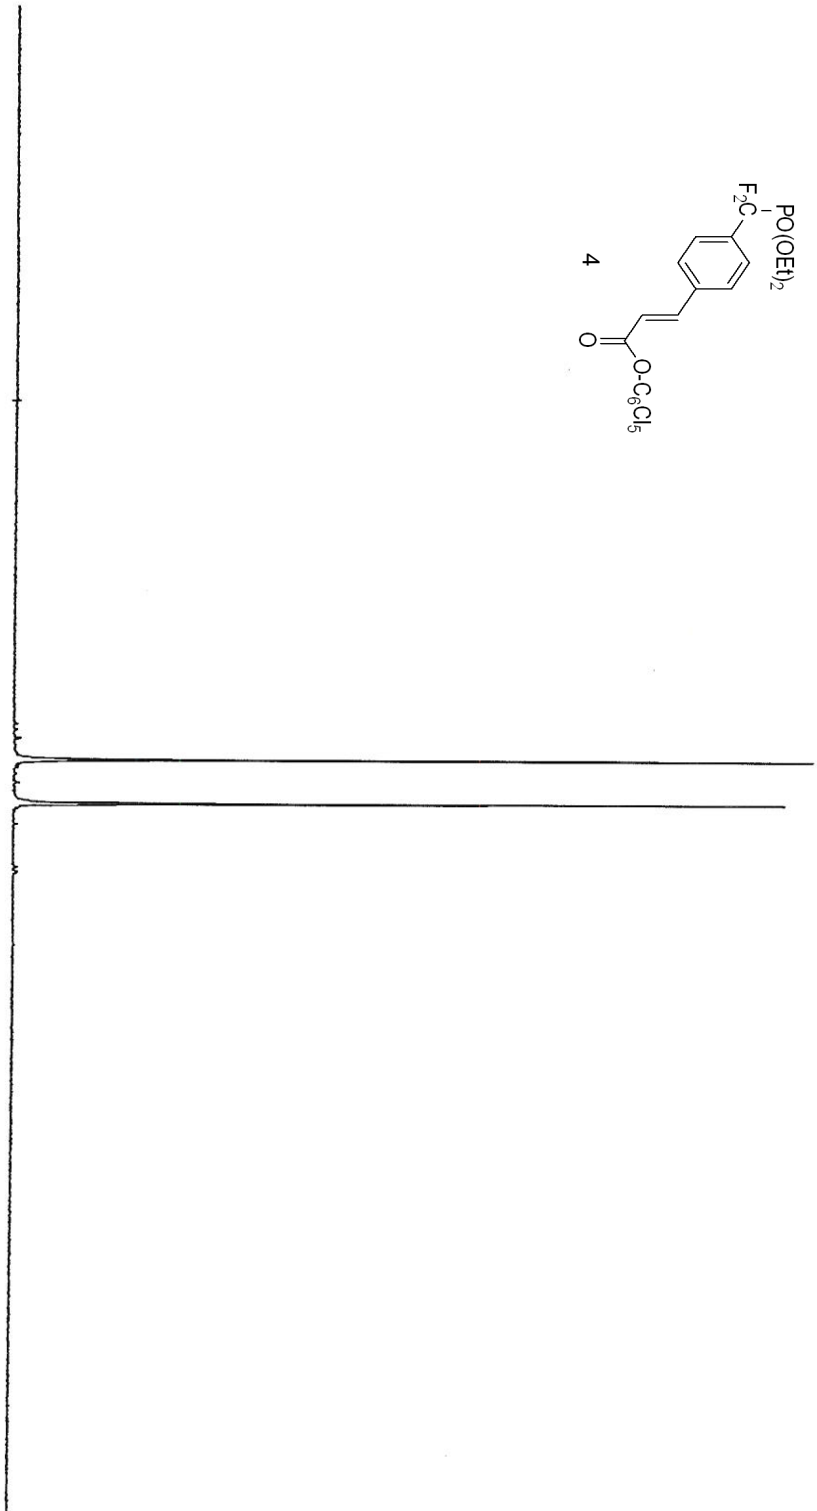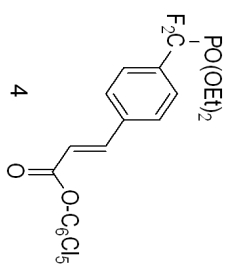

108.86  
 109.26

Current Data Parameters  
 NAME DEDPFCF\_OL-1  
 EXPNO 2  
 FRCNO 1

F2 - Acquisition Parameters  
 Date\_ 20090417  
 Time 15.43

INSTRUM 5 mm QNP 1H/19  
 PROBHD zgpg30  
 PULPROG zgpg30  
 TD 131072  
 SOLVENT CDCl<sub>3</sub>  
 NS 16  
 DS 4

SWH 67567.579 Hz  
 FIDRES 0.515500 Hz  
 AQ 0.9699828 sec  
 RG 912.9  
 DW 7.400 usec  
 DE 6.00 usec  
 TE 301.2 K  
 DI 1.00000000 sec  
 IDC 1

===== CHANNEL f1 =====  
 NUCL 19F  
 P1 12.00 usec  
 PL1 -4.00 dB  
 SFO1 282.3761148 MHz

F2 - Processing Parameters  
 SI 65536  
 SF 282.4043550 MHz  
 WDW EM  
 SSB 0  
 LB 0.30 Hz  
 GB 0  
 PC 1.00

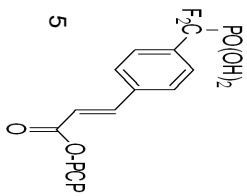

- 11.814
- 8.111
- 8.058
- 8.003
- 7.976
- 7.622
- 7.595
- 7.159
- 7.106

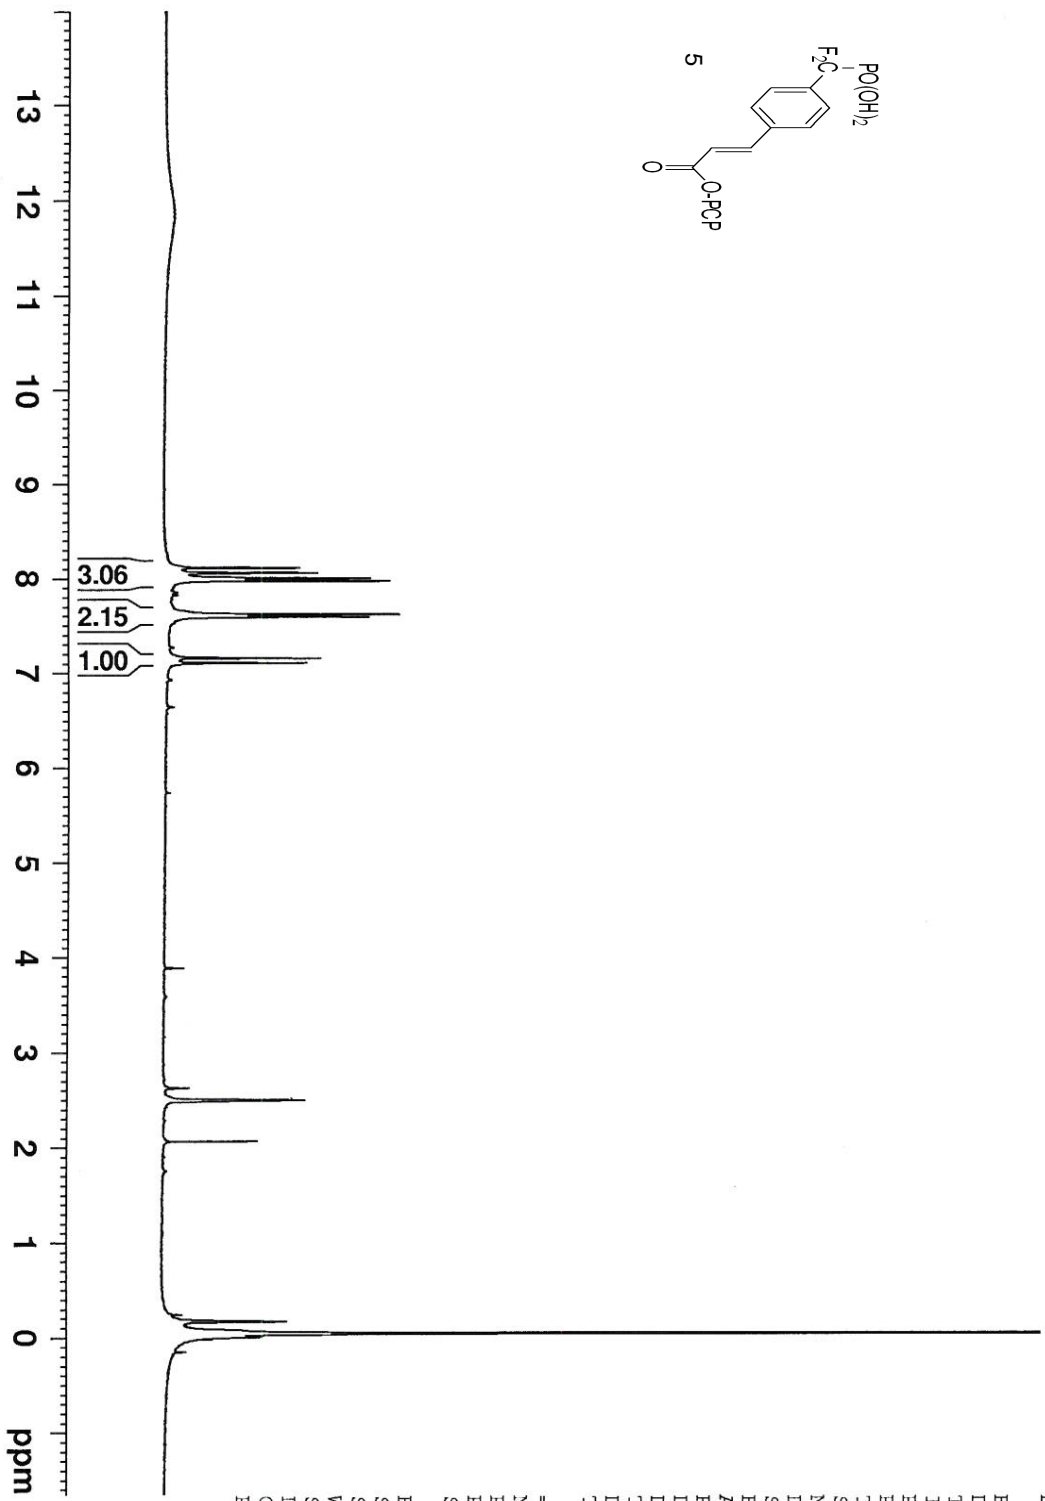

Current Data Parameters  
 NAME BP6M-6\_OL  
 EXPNO 6  
 PROCNO 1

F2 - Acquisition Parameters  
 Date\_ 20090417  
 Time 13.55

INSTRUM spect  
 PROBHD 5 mm QNP 1H/19  
 PULPROG zg30  
 TD 65536  
 FIDRES 0.094190 Hz  
 AQ 5.3084660 sec  
 RG 287.4  
 DE 81.000 usec  
 TE 300.2 K  
 D1 1.00000000 sec  
 TD0 1

NS 6  
 DS 2  
 SWH 6172.839 Hz  
 FIDRES 0.094190 Hz  
 AQ 5.3084660 sec  
 RG 287.4  
 DE 81.000 usec  
 TE 300.2 K  
 D1 1.00000000 sec  
 TD0 1

==== CHANNEL F1 =====  
 NUC1 1H  
 P1 10.25 usec  
 PL1 -1.00 dB  
 SFO1 300.1318534 MHz

F2 - Processing parameters  
 SI 32768  
 SF 300.1300000 MHz  
 WDW EM  
 SSB 0  
 LB 0.30 Hz  
 GB 0  
 PC 1.00

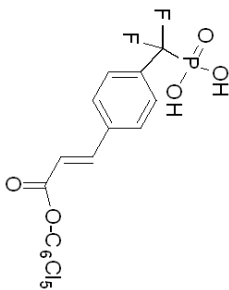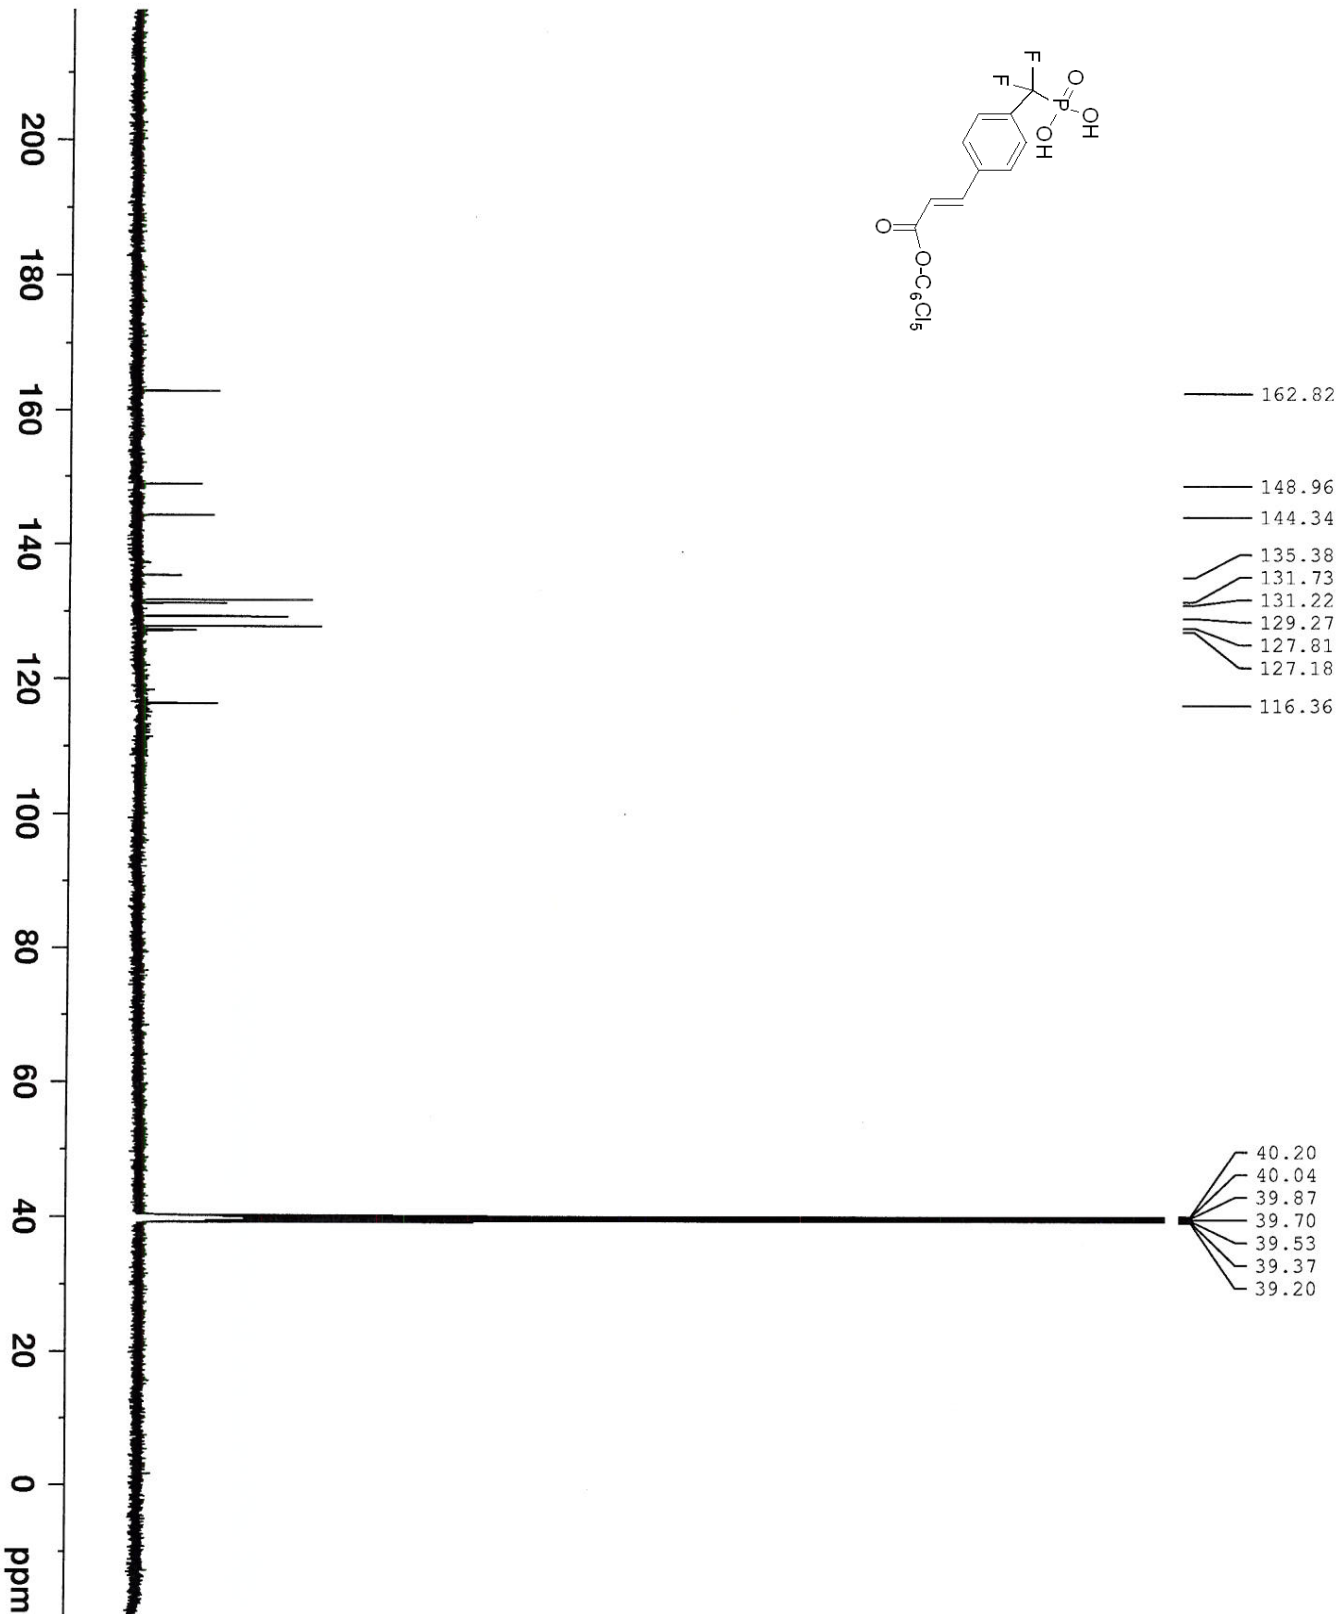

162.82  
148.96  
144.34  
135.38  
131.73  
131.22  
129.27  
127.81  
127.18  
116.36

40.20  
40.04  
39.87  
39.70  
39.53  
39.37  
39.20

```

Current Data Parameters
NAME          OL_5
EXPNO         1
PROCNO        1

F2 - Acquisition Parameters
Date_         20090605
Time          15.52
INSTRUM       spect
PROBHD        5 mm TXI 1H/D-
PULPROG       zgpg30
TD            65536
SOLVENT       DMSO
NS            1444
DS            4
SWH           30030.029
FIDRBS        0.458222
AQ            1.0912410
RG            4096
DM            16.650
DE            7.50
TE            300.2
D1            2.0000000
d11           0.0300000
DELTA         1.89999998
TD0           1

===== CHANNEL f1 =====
NUC1          13C
P1            11.25
PL1           -5.50
SFO1         125.7703643

===== CHANNEL f2 =====
CPDPRG2       waltz16
NUC2          1H
PCPD2        90.00
PL2           -2.00
PL12         18.50
PL13         20.00
SFO2         500.1320005

F2 - Processing parameters
SI            32768
SF           125.7577890
WDW           EM
SSB           0
LB            1.00
GB            0
PC            1.40
  
```



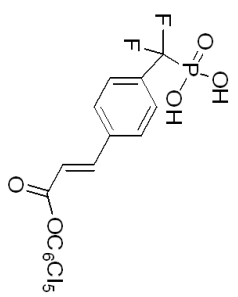

-108.33  
-108.70

-104 -105 -106 -107 -108 -109 -110 -111 -112 -113 -114 ppm

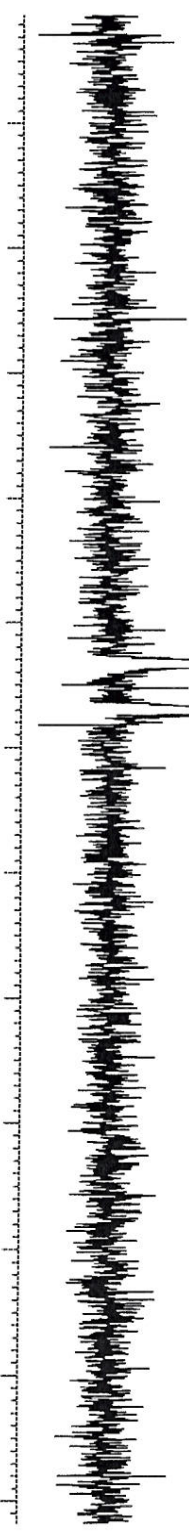

Current Data Parameters  
NAME ppm-5  
EXPNO 4  
PROCNO 1

F2 - Acquisition Parameters

Date\_ 20090605  
Time 10.51  
INSTRUM spect  
PROBHD 5 mm QNP 1H/19  
PULPROG zgpg30  
TD 131072  
SOLVENT CDCl3  
NS 64  
DS 4  
SWH 67567.570 Hz  
FIDRES 0.515500 Hz  
AQ 0.9699828 sec  
RG 4096  
DW 7.400 usec  
DE 6.00 usec  
TE 300.2 K  
D1 1.0000000 sec  
d11 0.0300000 sec  
d12 0.0000200 sec  
TDC 1

==== CHANNEL F1 =====

NUC1 19F  
P1 12.00 usec  
PL1 -4.00 dB  
SFO1 282.3761148 MHz

==== CHANNEL F2 =====

CPDPRG2 waltz16  
NUC2 1H  
PCPD2 100.00 usec  
PL2 -1.00 dB  
PL12 19.00 dB  
SFO2 300.1312005 MHz

F2 - Processing parameters

SI 65536  
SF 282.4043550 MHz  
WDW EM  
SSB 0  
LB 0.30 Hz  
GB 0  
PC 1.00

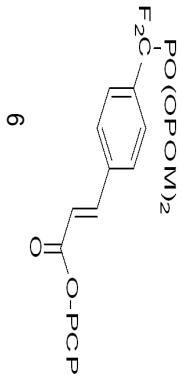

- 7.917
- 7.885
- 7.645
- 7.627
- 7.617
- 7.600
- 7.194
- 6.690
- 6.658
- 5.819
- 5.694
- 5.683
- 5.668
- 5.658
- 5.608
- 5.598
- 5.584
- 5.574

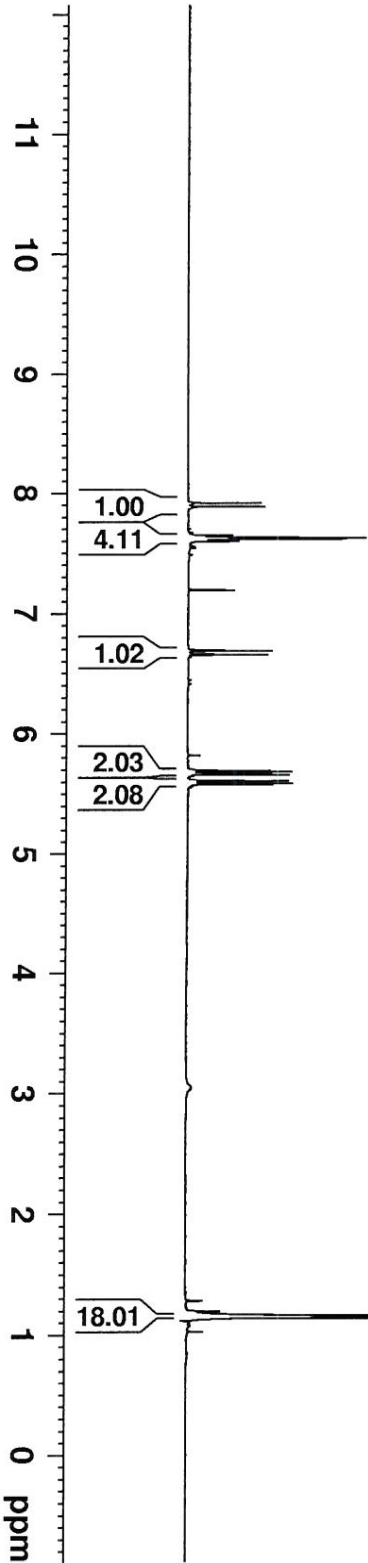

- 1.155
- 1.141

Current Data Parameters  
 Name BPPCPINN  
 EXPNO 1  
 PROCNO 1

F2 - Acquisition Parameters  
 Date\_ 20090421  
 Time 8.34  
 INSTRUM spect  
 PROBHD 5 mm TXI 1H/D-  
 PULPROG zg30  
 TD 65536  
 SOLVENT CDCl3  
 NS 4  
 DS 2  
 SWH 10330.578  
 FIDRES 0.157632  
 AQ 3.1720407  
 RG 40.3  
 DW 48.400  
 DE 7.50  
 TE 298.2  
 D1 1.00000000  
 TD0 1

==== CHANNEL F1 ====  
 NUC1 1H  
 P1 8.00  
 PL1 -2.00  
 SFO1 500.1330885

F2 - Processing Parameters  
 SI 32768  
 SF 500.1300463  
 WDW EM  
 SSB 0  
 LB 0.30  
 GB 0  
 PC 1.00

176.54  
 162.14  
 147.40  
 144.12  
 132.06  
 131.63  
 128.59  
 127.83  
 127.21  
 117.00  
 82.52  
 82.47  
 77.31  
 77.05  
 76.80  
 38.75  
 26.76

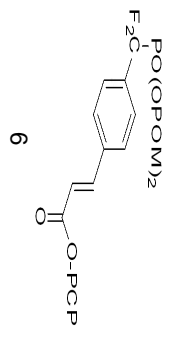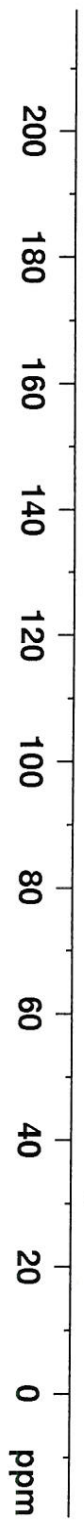

Current Data Parameters  
 NAME BPPCPCINN  
 EXPNO 2  
 PROCNO 1

F2 - Acquisition Parameters  
 Date\_ 20090421  
 Time 8.44

INSTRUM spect  
 PROBHD 5 mm TXI 1H/D-  
 PULPROG zgpg30  
 TD 65536  
 SOLVENT CDCl3  
 NS 150  
 DS 4

SWH 30030.029 Hz  
 FIDRES 0.458222 Hz  
 AQ 1.0912410 sec  
 RG 1448.2  
 DW 16.650 us  
 DE 7.50 us  
 TE 298.2 K  
 D1 2.00000000 sec  
 d11 0.03000000 sec  
 DELTA 1.89999998 sec  
 TD0 1

==== CHANNEL f1 =====  
 NUC1 13C  
 P1 11.25 us  
 PL1 -5.50 dB  
 SFO1 125.7703643 MHz

==== CHANNEL f2 =====  
 CPDPRG2 waltz16  
 NUC2 1H  
 PCPD2 90.00 us  
 PL2 -2.00 dB  
 PL12 18.50 dB  
 PL13 20.00 dB  
 SFO2 500.1320005 MHz

F2 - Processing parameters  
 SI 32768  
 SF 125.7577890 MHz  
 WDW EM  
 SSB 0  
 IB 1.00 Hz  
 GB 0  
 PC 1.40

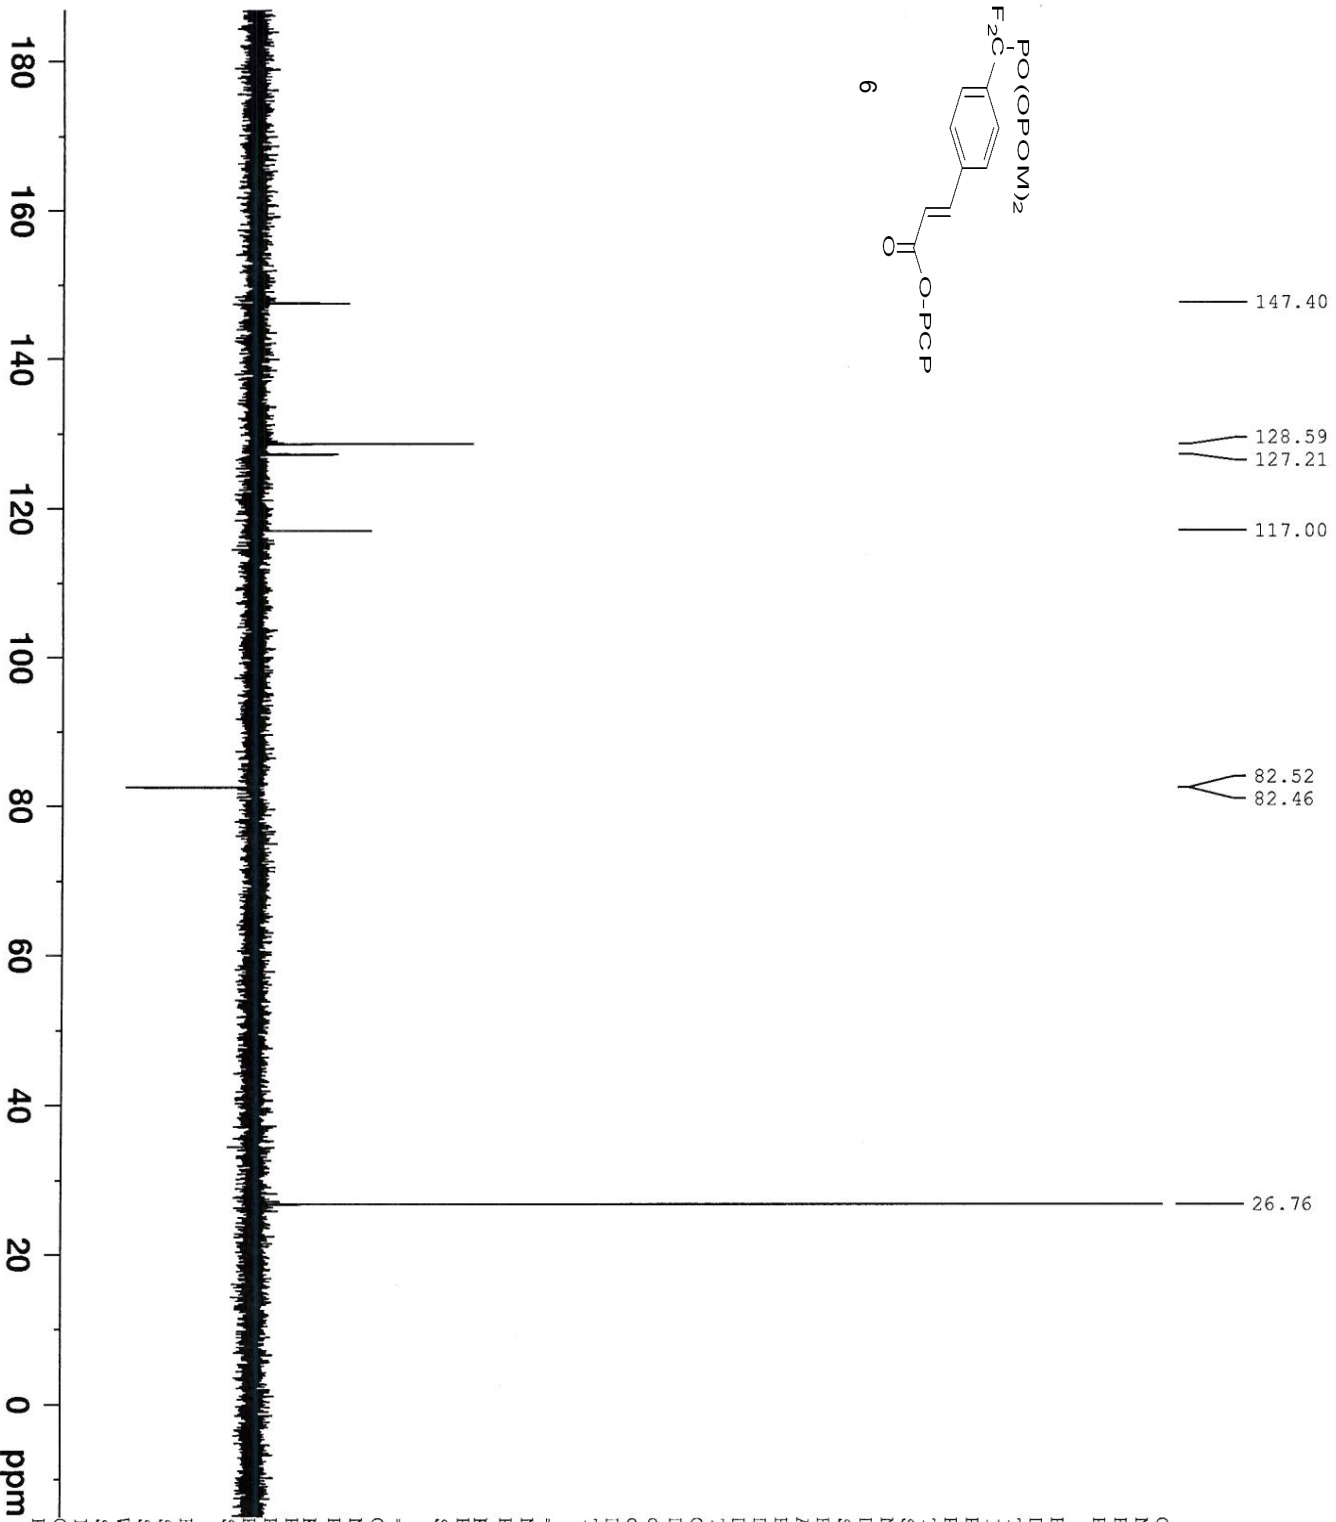

Current Data Parameters  
 NAME BPPCPCINN  
 EXPNO 5  
 PROCNO 1

F2 - Acquisition Parameters  
 Date\_ 20090421  
 Time 10.02  
 INSTRUM spect  
 PROBHDD 5 mm TXI 1H/D-  
 PULPROG dept135  
 TD 65536  
 SOLVENT CDCl3  
 NS 31  
 DS 4

SWH 30030.029 Hz  
 FIDRES 0.458222 Hz  
 AQ 1.0912410 sec  
 RG 9195.2  
 DW 16.650 usec  
 DE 7.50 usec  
 TE 298.2 K

CNST2 145.000000  
 D1 2.00000000 sec  
 d2 0.00344828 sec  
 d12 0.00002000 sec  
 DELTA 0.00001432 sec  
 TDC 1

==== CHANNEL F1 =====  
 NUC1 13C  
 P1 11.25 usec  
 P2 22.50 usec  
 PL1 -5.50 dB  
 SF01 125.7703643 MHz

==== CHANNEL F2 =====  
 CPDPRG2 waltz16  
 NUC2 1H  
 P3 8.50 usec  
 P4 17.00 usec  
 PCDD2 90.00 usec  
 PL2 -2.00 dB  
 PL12 18.50 dB  
 SF02 500.1320005 MHz

F2 - Processing parameters  
 SI 32768  
 SE 125.7577890 MHz  
 WDW EM  
 SSB 0  
 LB 1.00 Hz  
 GB 0  
 PC 1.40

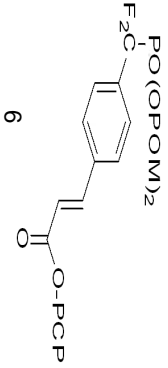

5.25  
4.64  
4.03

Current Data Parameters  
 NAME BPPCPCINN  
 EXPNO 4  
 PROCNO 1

F2 - Acquisition Parameters

Date\_ 20090421  
 Time 9.58  
 INSTRUM spect  
 PROBHD 5 mm TXI 1H/D-  
 PULPROG zgpg30  
 TD 65536  
 SOLVENT Acetone  
 NS 16  
 DS 4  
 SWH 80645.164 Hz  
 FIDRES 1.230548 Hz  
 AQ 0.4063794 sec  
 RG 20642.5  
 DW 6.200 usec  
 DE 7.50 usec  
 TE 298.2 K  
 D1 2.00000000 sec  
 d11 0.03000000 sec  
 DELTA 1.89999998 sec  
 TD0 1

CHANNEL f1

NUC1 31P  
 P1 15.00 usec  
 PL1 -4.50 dB  
 SF01 202.4462121 MHz

CHANNEL f2

CPDPRG2 waltz16  
 NUC2 1H  
 PCPD2 90.00 usec  
 PL2 -2.00 dB  
 PL12 18.50 dB  
 PL13 20.00 dB  
 SF02 500.1320005 MHz

F2 - Processing parameters

SI 32768  
 SF 202.4563350 MHz  
 WDW EM  
 SSB 0  
 LB 1.00 Hz  
 GB 0  
 PC 1.40

20  
15  
10  
5  
0  
-5  
ppm

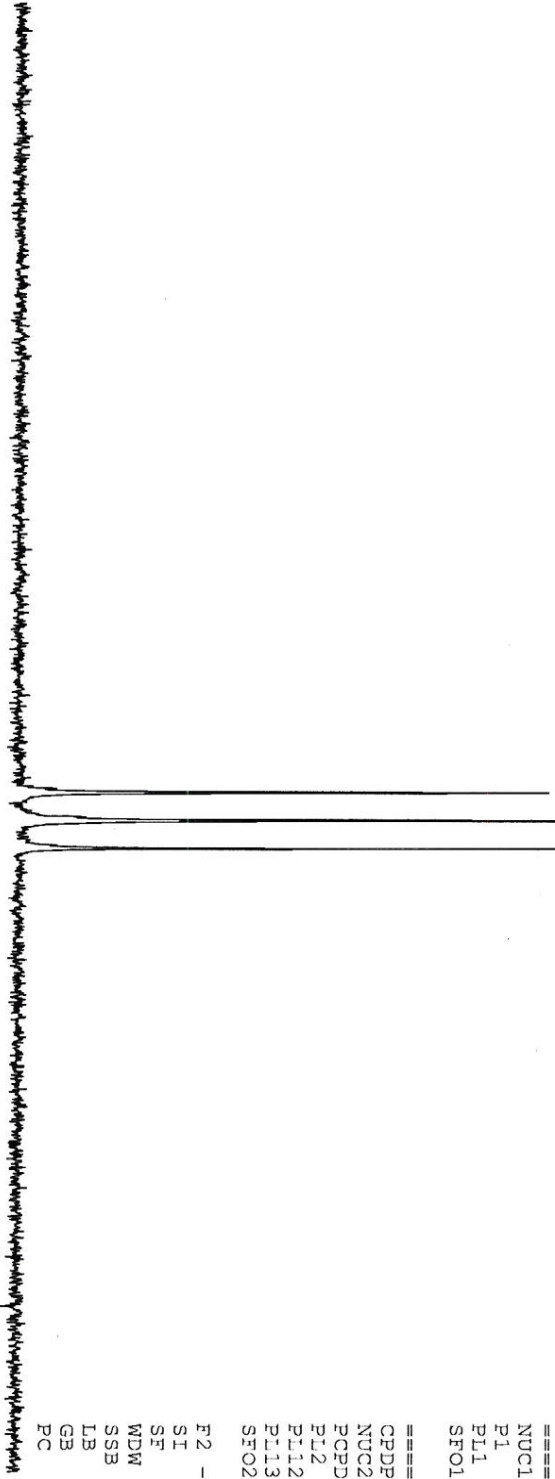

LN  
N  
U

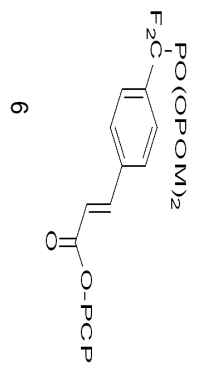

-30872.09  
-30995.53

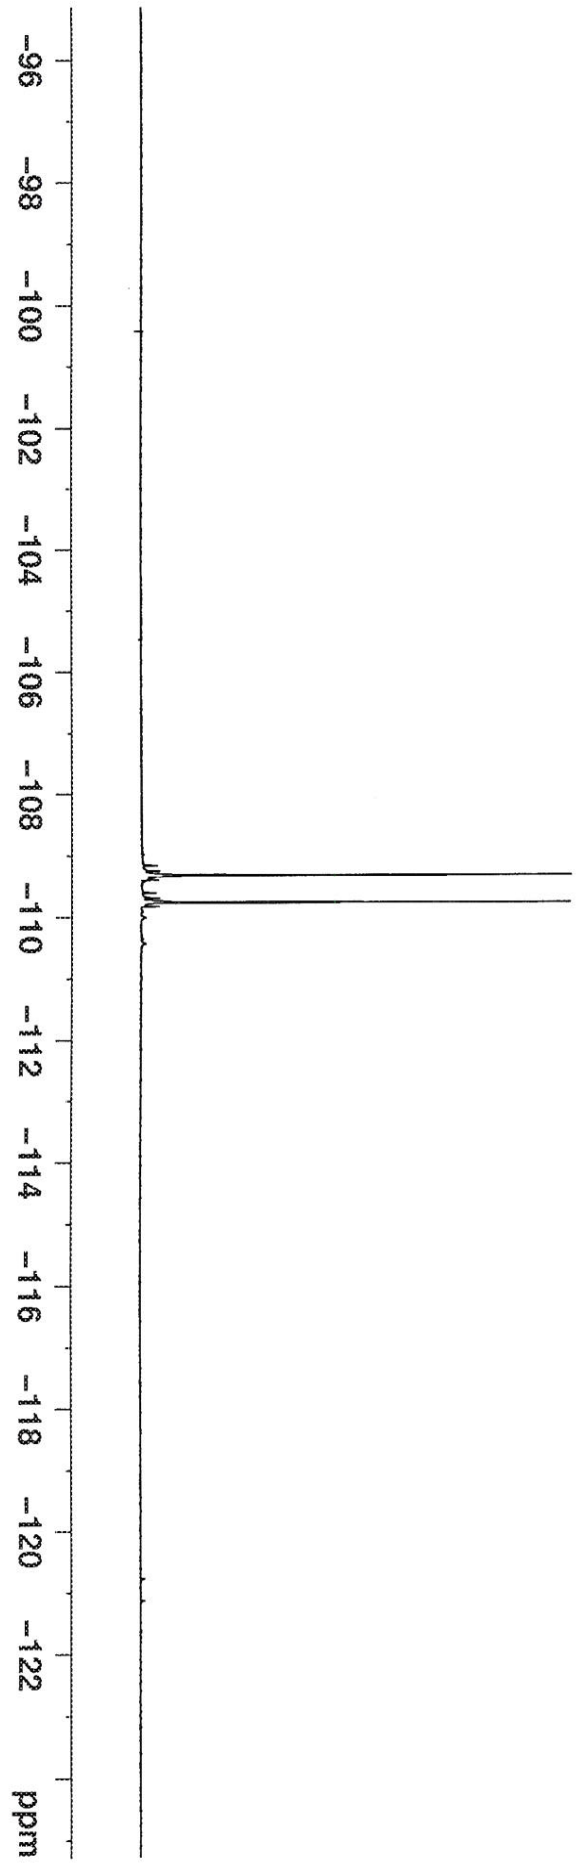

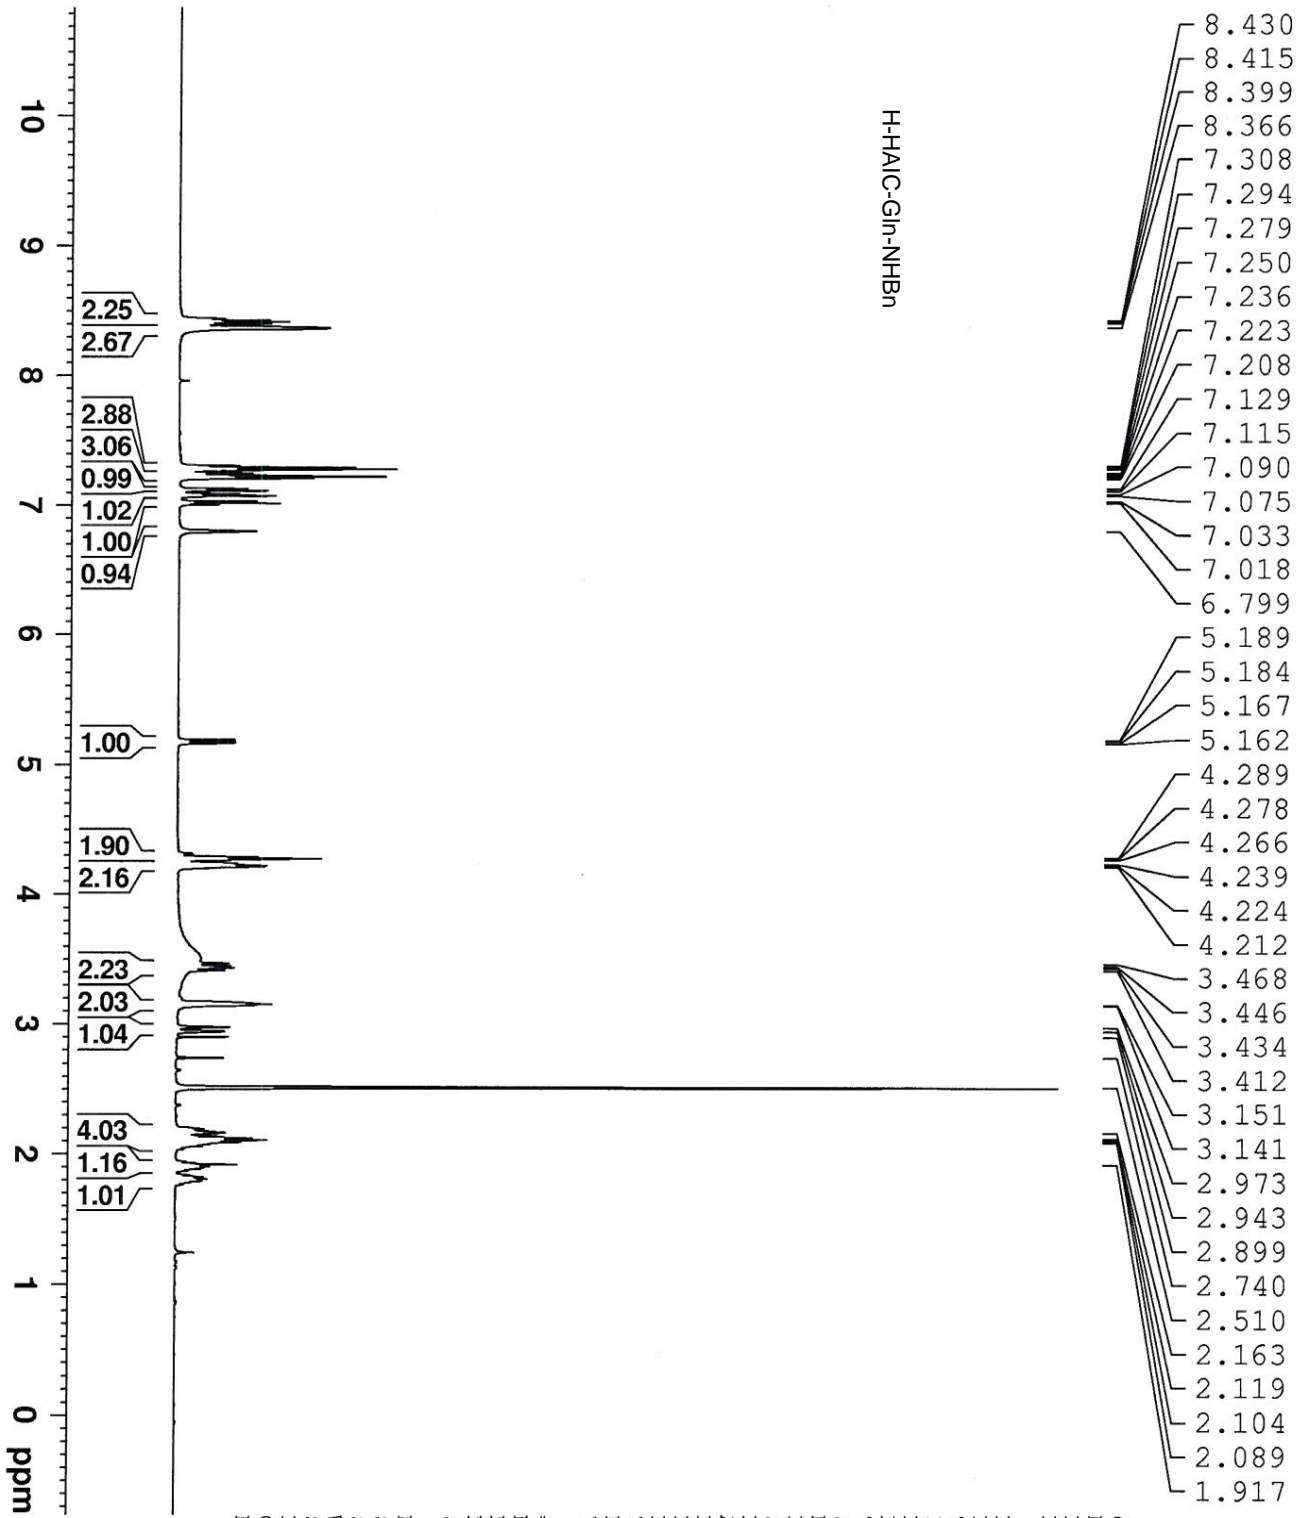

H-HAIC-Gln-NHBn

Current Data Parameters  
 NAME 69G  
 EXPNO 1  
 PROCNO 1

F2 - Acquisition Parameters  
 Date\_ 20090414  
 Time 16.50  
 INSTRUM spect  
 PROBHD 5 mm TXI 1H/D-  
 PULPROG zg30  
 TD 65536  
 SOLVENT CDCl3  
 NS 16  
 DS 2  
 SWH 10330.578 Hz  
 FIDRES 0.157632 Hz  
 AQ 3.1720407 sec  
 RG 256  
 DW 48.400 usec  
 DE 7.50 usec  
 TE 299.2 K  
 D1 1.00000000 sec  
 TD0 1

==== CHANNEL F1 =====  
 NUC1 1H  
 P1 8.75 usec  
 PL1 -2.00 dB  
 SFO1 500.1330885 MHz

F2 - Processing parameters  
 SI 32768  
 SF 500.1300000 MHz  
 WDW EM  
 SSB 0  
 LB 0.30 Hz  
 GB 0  
 PC 1.00



H-HAIC-Gln-NHBr

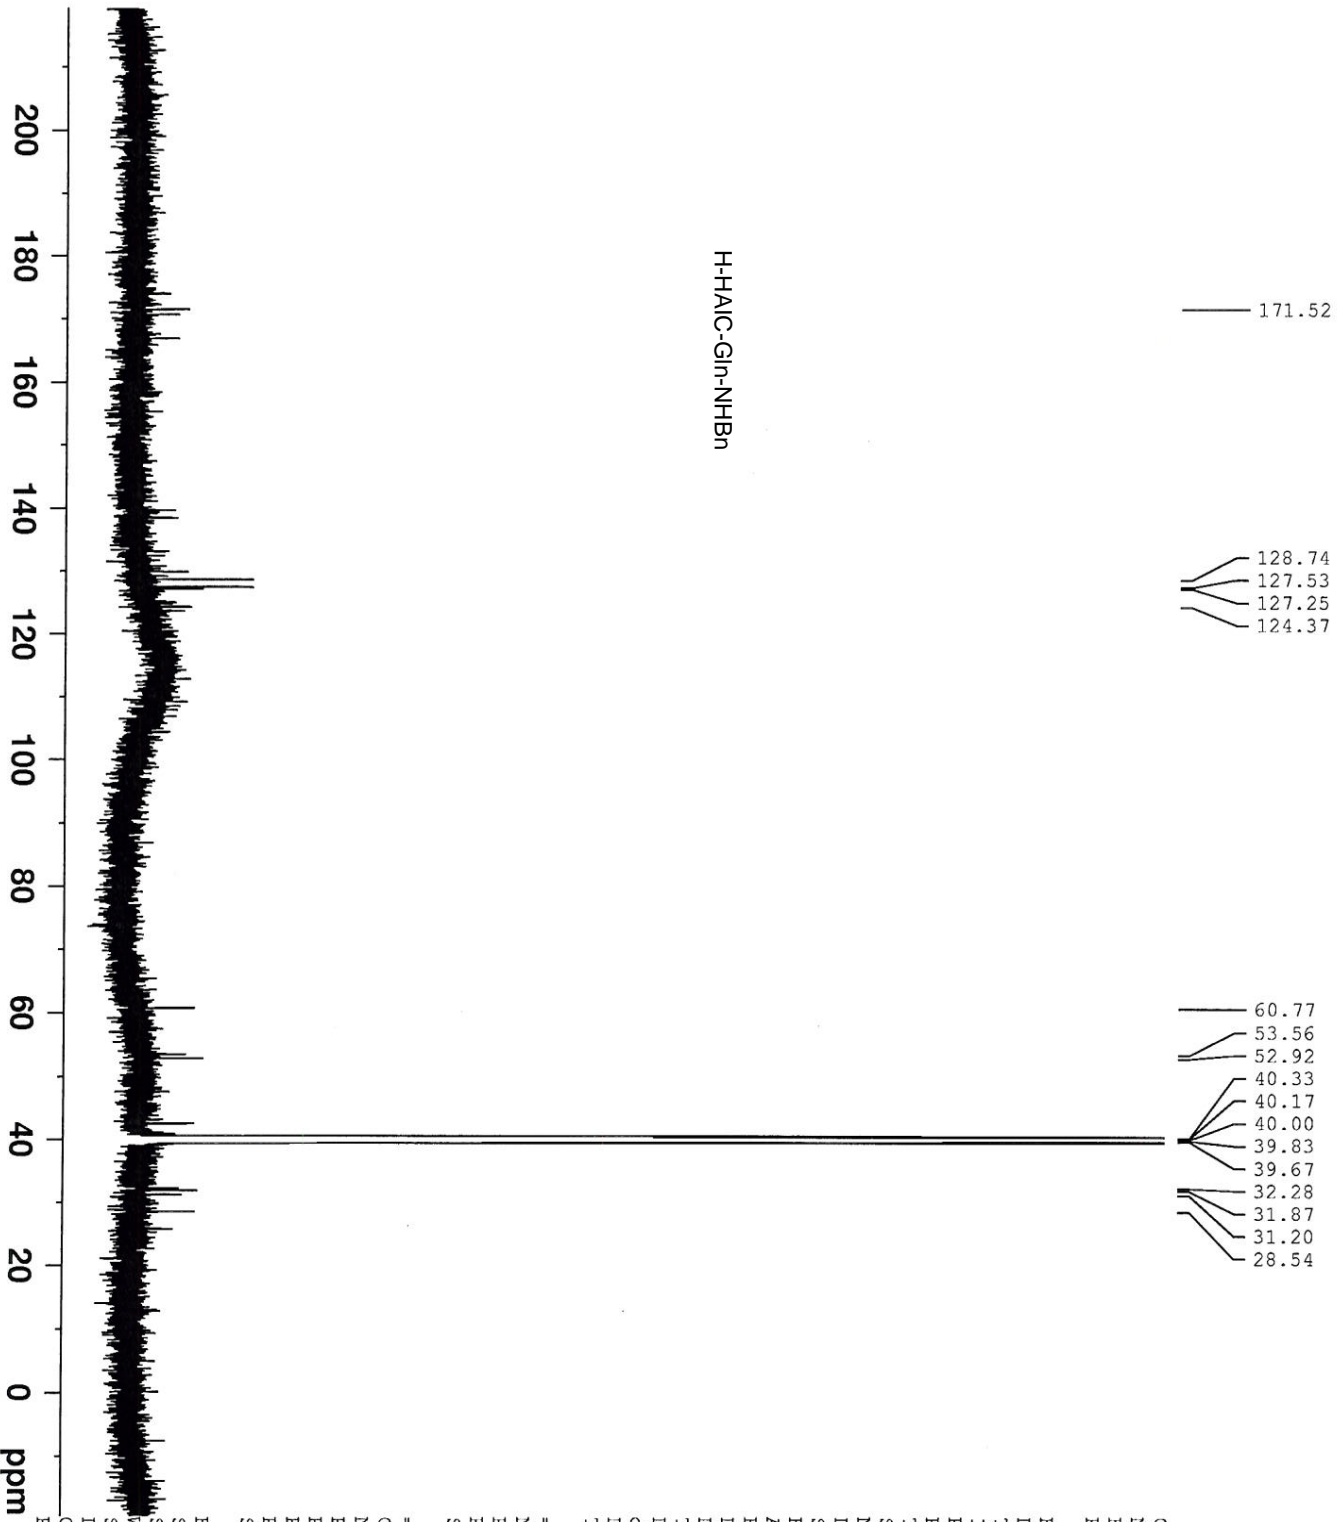

171.52

128.74  
127.53  
127.25  
124.37

60.77  
53.56  
52.92  
40.33  
40.17  
40.00  
39.83  
39.67  
32.28  
31.87  
31.20  
28.54

Current Data Parameters  
NAME 69G  
EXPNO 3  
PROCNO 1

F2 - Acquisition Parameters  
Date\_ 20090414  
Time 17.03

INSTRUM spect  
PROBHD 5 mm TXI IH/D-  
PULPROG zgpg30  
TD 65536  
SOLVENT CDC13  
NS 15360  
DS 4

SWH 30030.029 Hz  
FIDRES 0.458222 Hz  
AQ 1.0912410 sec  
RG 2896.3

DE 16.650 usec  
TE 299.2 K  
D1 2.00000000 sec  
d11 0.03000000 sec  
DELTA 1.89999998 sec  
TD0 1

==== CHANNEL F1 =====  
NUC1 13C  
P1 11.25 usec  
PL1 -5.50 dB  
SFO1 125.7703643 MHz

==== CHANNEL F2 =====  
CPDPRG2 waltz16  
NUC2 1H  
PCPD2 90.00 usec  
PL2 -2.00 dB  
PL12 18.50 dB  
PL13 20.00 dB  
SFO2 500.1320005 MHz

F2 - Processing parameters  
SI 32768  
SF 125.7577890 MHz  
WDW EM  
SSB 0  
LB 1.00 Hz  
GB 0

PC 1.40  
∞  
∞  
∞



H-HACl-Gln-NHBr

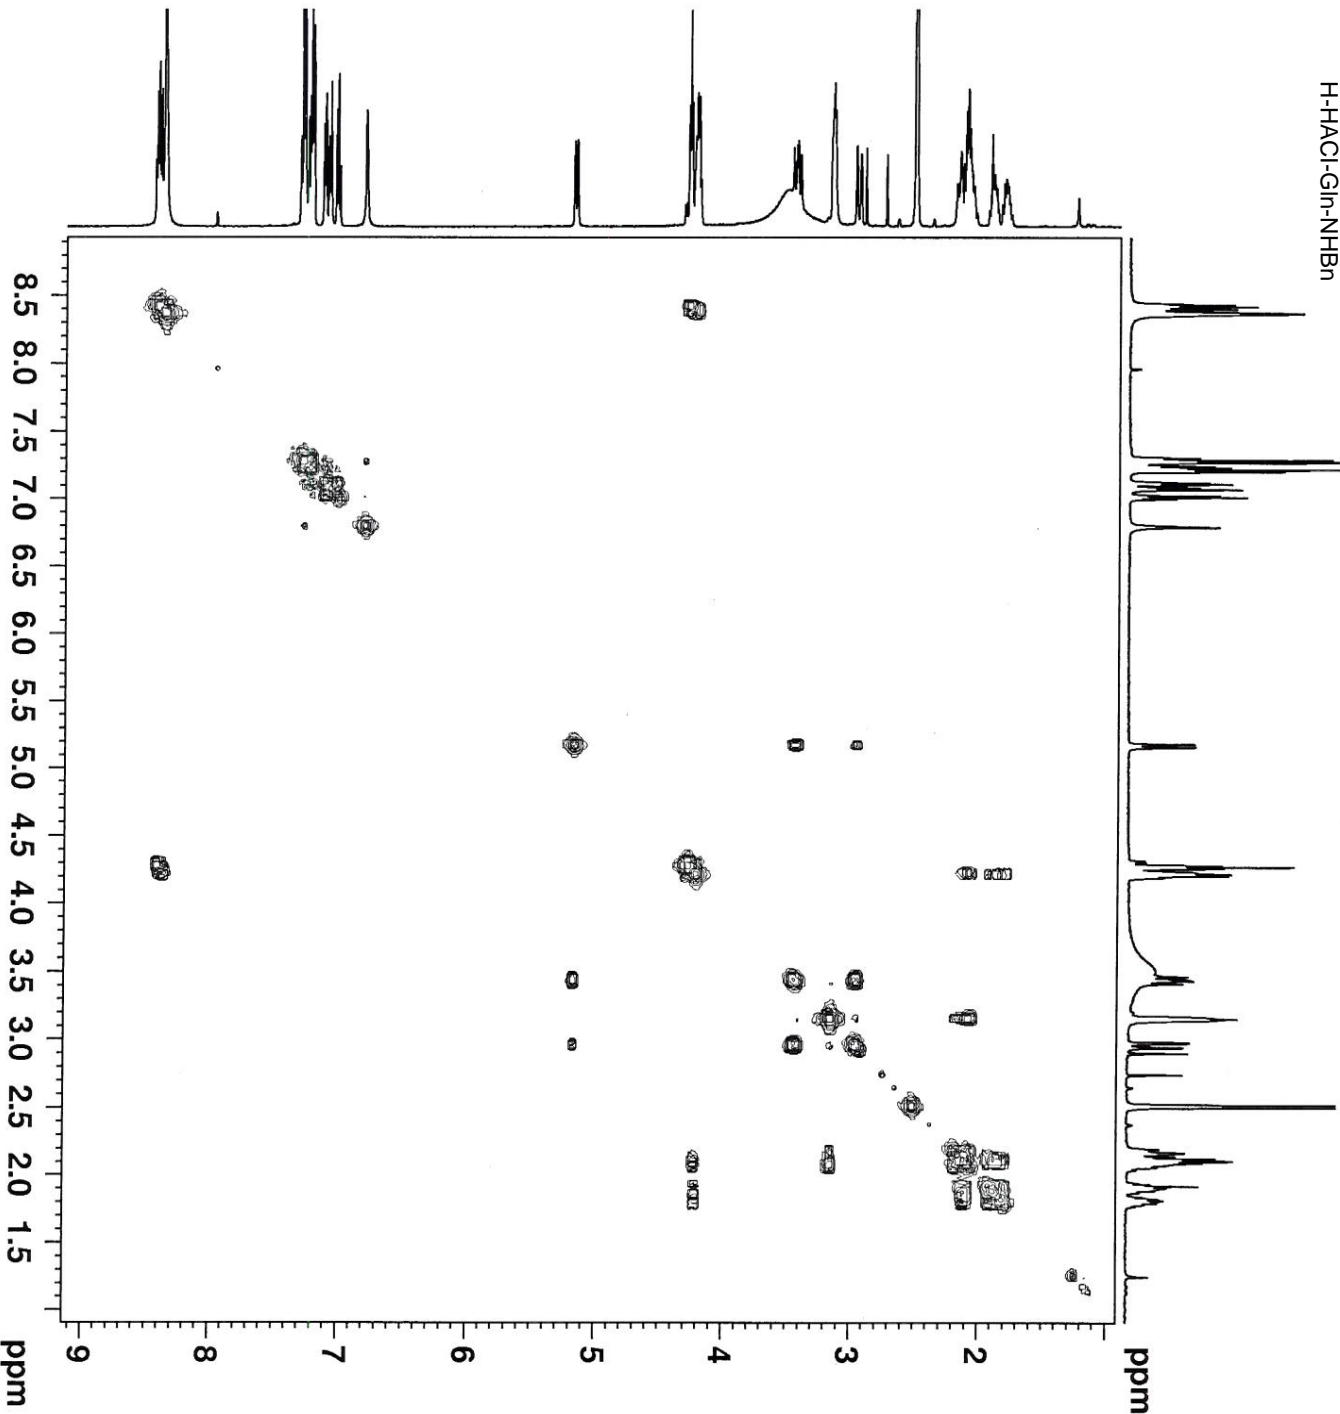

Current Data Parameters  
 NAME 69G  
 EXPNO 2  
 PROCNO 1

F2 - Acquisition Parameters  
 Date\_ 20090414  
 Time 16.51

INSTRUM spect  
 PROBHD 5 mm TXI 1H/D-  
 PULPROG cosygpgf  
 TD 2048  
 SOLVENT DMSO

NS 2  
 DS 8  
 SWH 6666.667 Hz  
 FIDRES 3.255208 Hz  
 AQ 0.1537250 sec  
 RG 64  
 DW 75.000 usec  
 DE 7.50 usec  
 TE 299.2 K  
 D0 0.00000300 sec  
 d1 1.48689198 sec  
 d13 0.00000400 sec  
 d16 0.00020000 sec  
 INO 0.00015000 sec

CHANNEL f1 =====  
 NUC1 1H  
 P0 8.75 usec  
 P1 8.75 usec  
 PL1 -2.00 dB  
 SFO1 500.133069 MHz

GRADIENT CHANNEL =====  
 GPNAM1 SINE.100  
 GPNAM2 SINE.100  
 GPZ1 10.00 %  
 GPZ2 10.00 %  
 P16 1000.00 usec

F1 - Acquisition Parameters  
 NDO 1  
 TD 128  
 SFO1 500.133 MHz  
 FIDRES 52.083332 Hz  
 SW 13.330 ppm  
 ENMODE QF

F2 - Processing parameters  
 SI 1024  
 SF 500.1300000 MHz  
 WDW SINE  
 SSB 0  
 LB 0.00 Hz  
 GB 0  
 PC 1.00

F1 - Processing parameters  
 SI 1024  
 KC2 QF  
 SF 500.1300000 MHz  
 WDW SINE  
 SSB 0  
 LB 0.00 Hz  
 GB 0

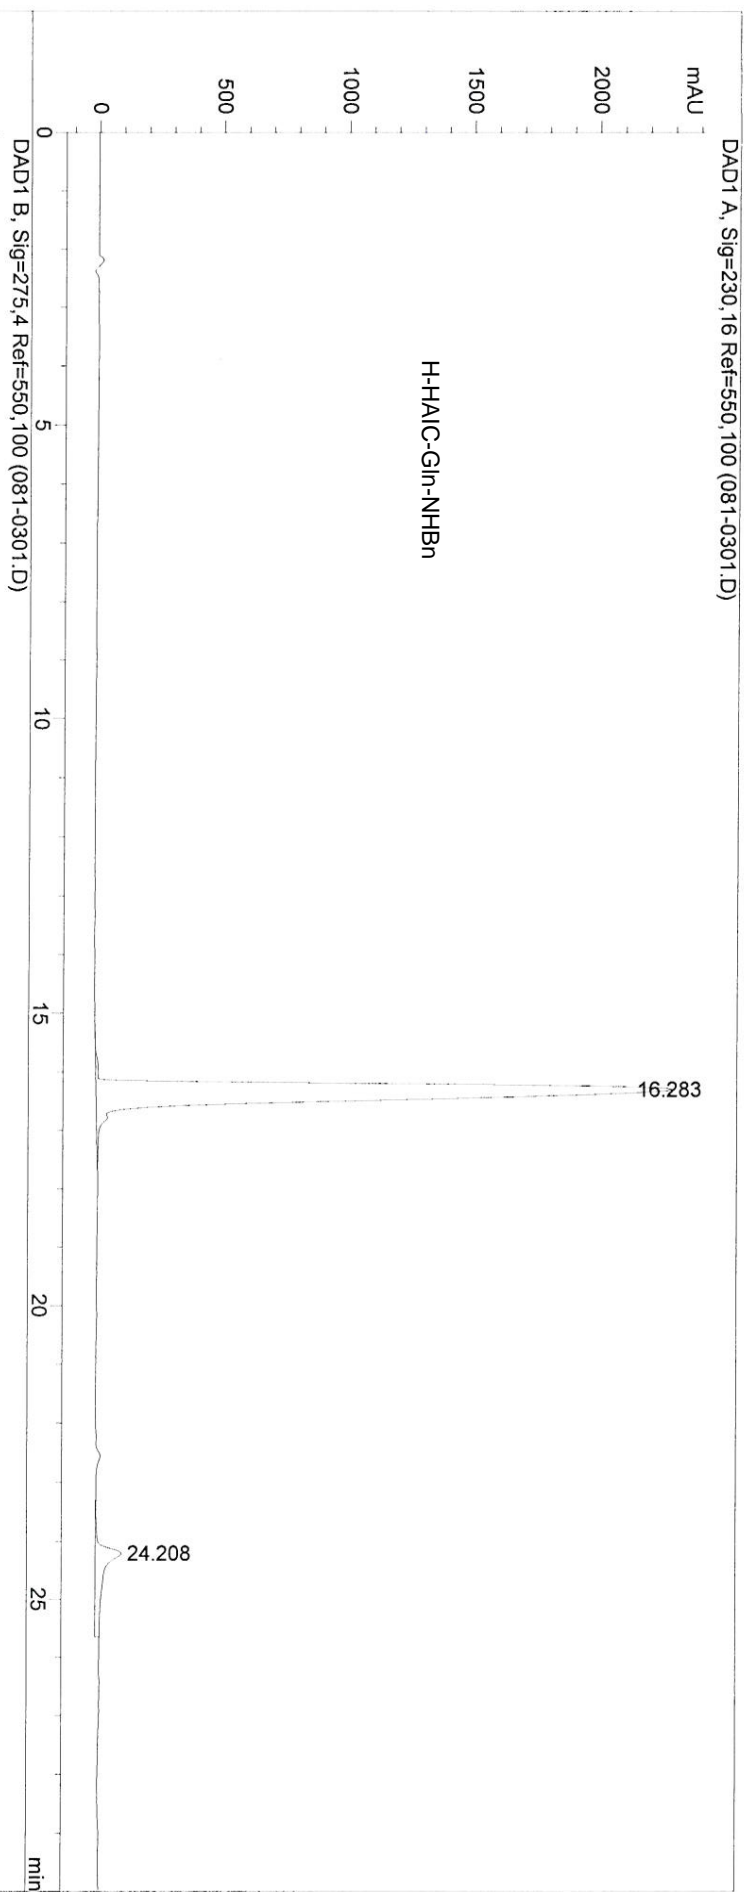

S30

H-Leu-Pro-Gln-NH<sub>2</sub>

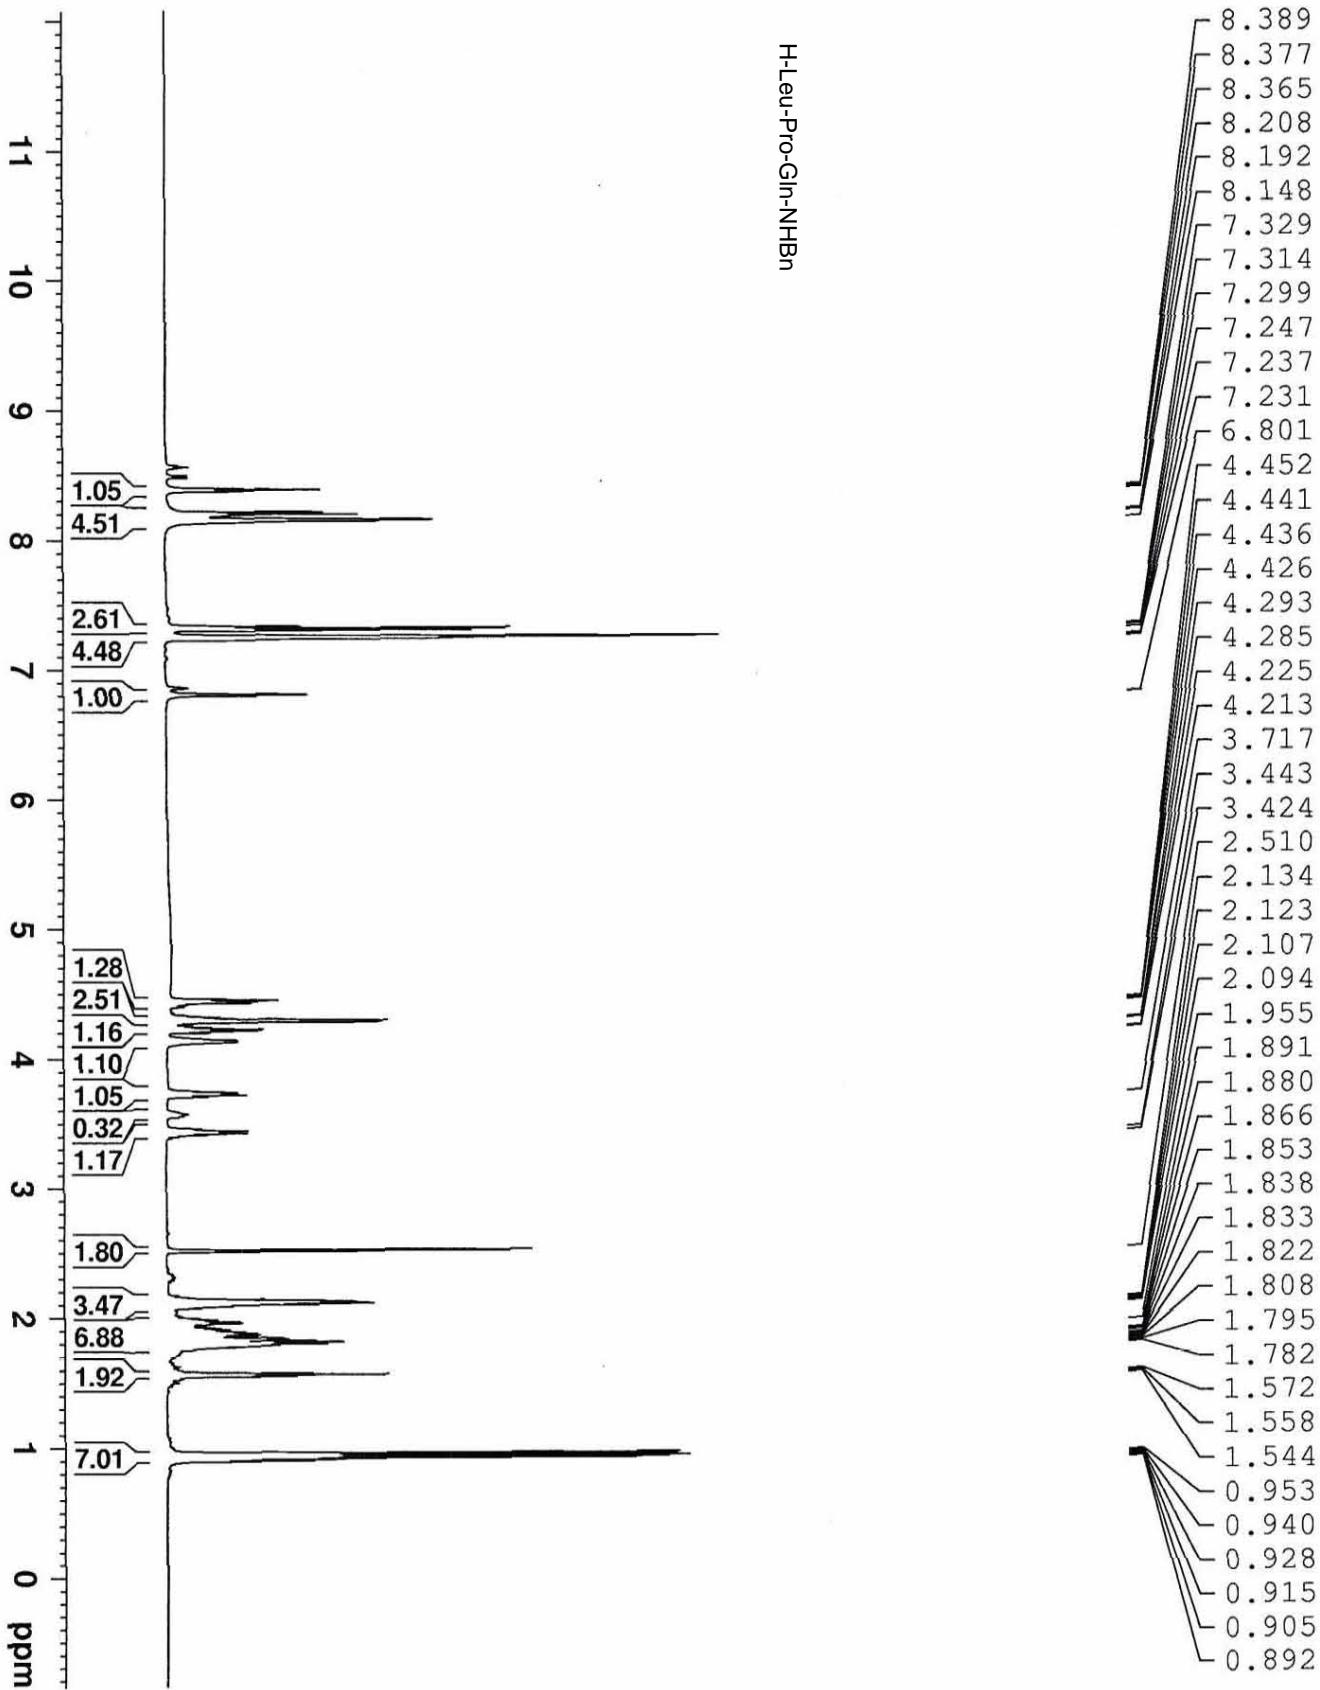

- 8.389
- 8.377
- 8.365
- 8.208
- 8.192
- 8.148
- 7.329
- 7.314
- 7.299
- 7.247
- 7.237
- 7.231
- 6.801
- 4.452
- 4.441
- 4.436
- 4.426
- 4.293
- 4.285
- 4.225
- 4.213
- 3.717
- 3.443
- 3.424
- 2.510
- 2.134
- 2.123
- 2.107
- 2.094
- 1.955
- 1.891
- 1.880
- 1.866
- 1.853
- 1.838
- 1.833
- 1.822
- 1.808
- 1.795
- 1.782
- 1.572
- 1.558
- 1.544
- 0.953
- 0.940
- 0.928
- 0.915
- 0.905
- 0.892

Current Data Parameters: ZTE  
 NAME  
 EXEMO  
 FNOCHO

F2 - Acquisition Param: 200905  
 File- 1.1  
 INSTRUM 5 mm TXI HPL  
 PROBHD  
 PULPROG 652  
 TD  
 SOLVENT CDC  
 NS  
 DS  
 SWH 10330.57  
 FIDRES 0.1576  
 AQ 3.172046  
 RG 101  
 DW 48.41  
 DE 7.1  
 TE 298.  
 D1 1.0000004  
 TD0

CHANNEL F1  
 NUCL P1 8.4  
 P1 -2.0  
 SFO1 500.133086

F2 - Processing param  
 SI 3276  
 SF 500.130000  
 WDW 1  
 SSB  
 LB 0.  
 GB  
 PC 1.4

200 180 160 140 120 100 80 60 40 20 0 ppm

H-Leu-Pro-Gln-NH<sub>2</sub>

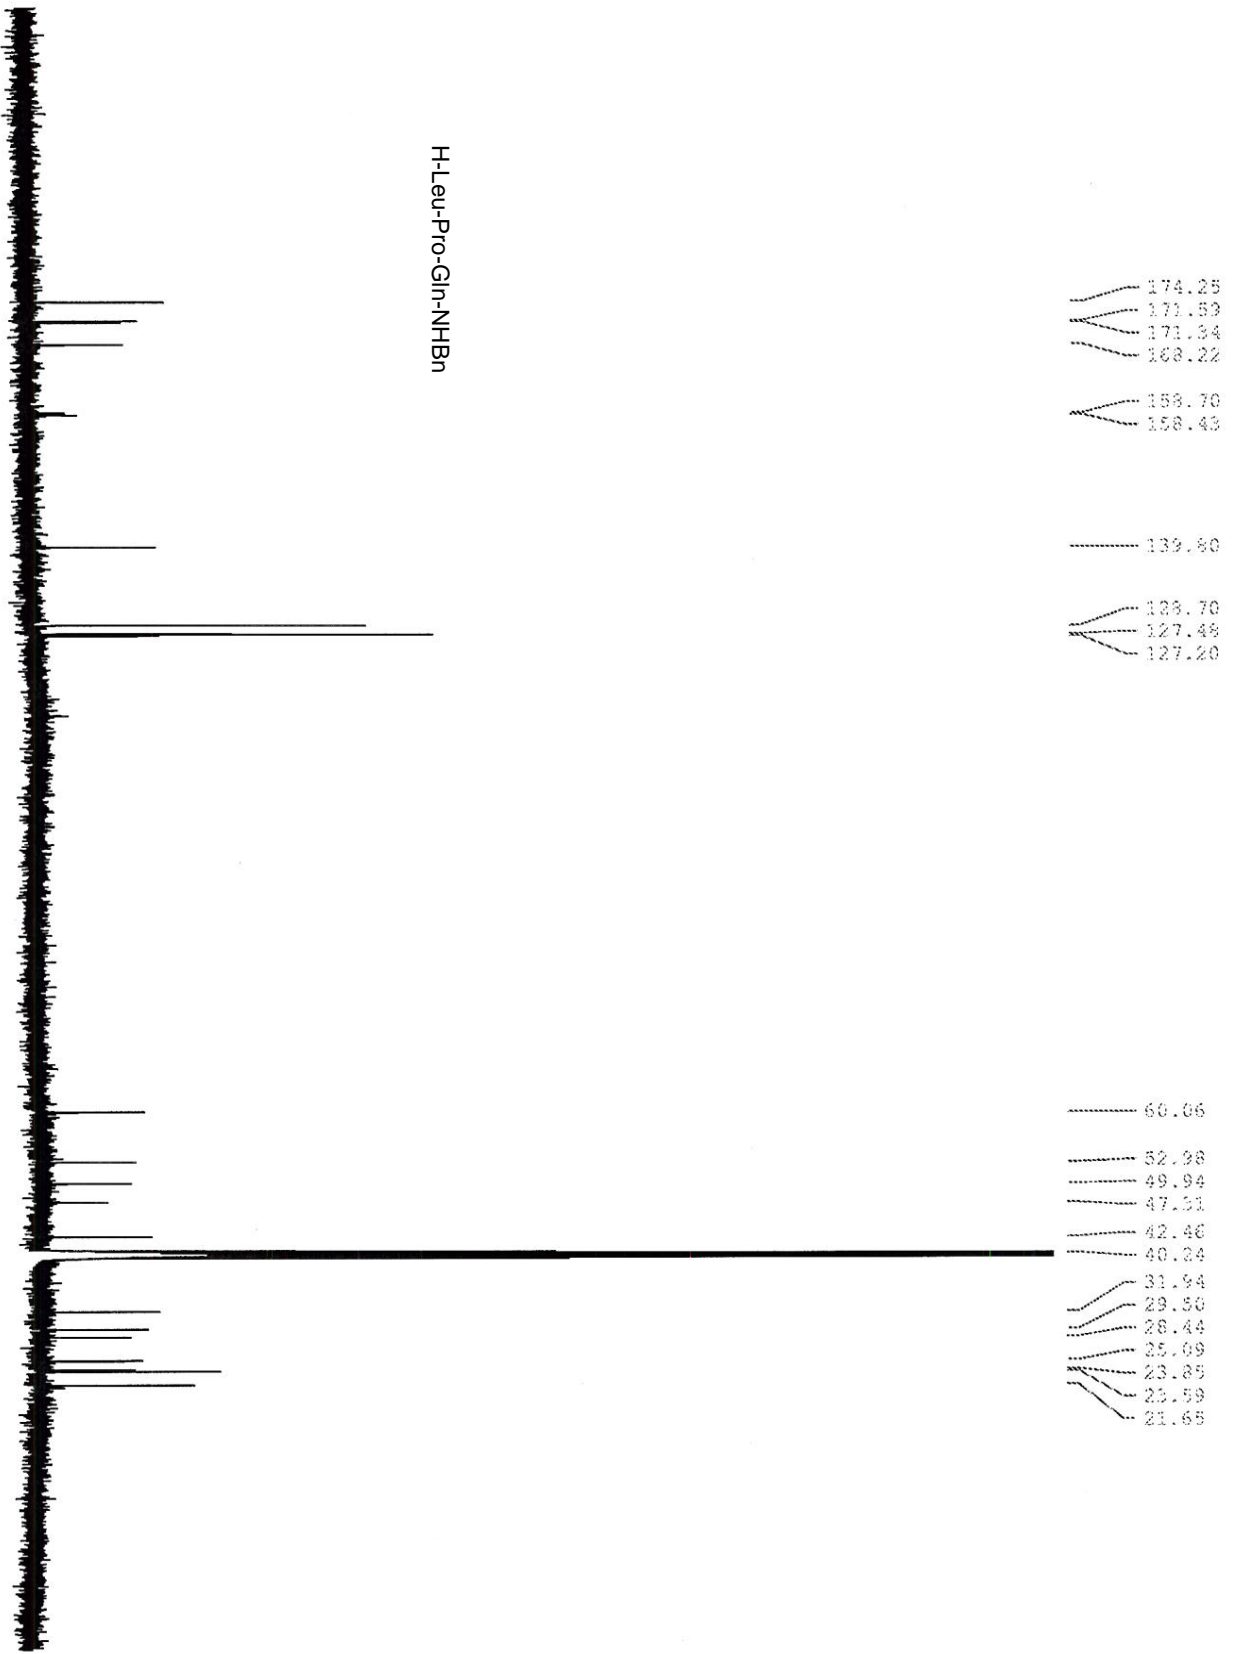

174.25  
171.59  
171.34  
168.22  
158.70  
158.43  
139.80  
138.70  
127.48  
127.20  
60.06  
52.98  
49.94  
47.51  
42.40  
40.04  
31.94  
29.50  
28.44  
25.09  
23.85  
23.59  
21.68

Current Data Parameters  
NAME 276G  
EXPNO 5  
PROCNO 1

F2 - Acquisition Parameters  
Date\_ 20090514  
Time 17.15  
INSTRUM spect  
PROBHD 5 mm TXI 1H/D-  
PULPROG zgpg30  
TD 65536  
SOLVENT DMSO  
NS 1285  
DS 4  
SWH 30030.029 F  
FIDRES 0.458222 F  
AQ 1.0912410 S  
RG 4597.6  
DW 16.650 U  
DE 7.50 U  
TE 299.2 K  
D1 2.00000000 S  
d11 0.03000000 S  
DELTA 1.89999998 S  
TD0 1

==== CHANNEL f1 =====  
NUC1 13C  
P1 12.00 U  
PL1 -5.50 C  
SFO1 125.7703643 K

==== CHANNEL f2 =====  
CPDPRG2 waltz16  
NUC2 1H  
PCPD2 90.00 U  
PL2 -2.00 C  
PL12 18.50 C  
PL13 20.00 C  
SFO2 500.1320005 K

F2 - Processing parameters  
SI 32768  
SF 125.7577890 K  
WDW EM  
SSB 0  
LB 1.00 F  
GB 0  
PC 1.40

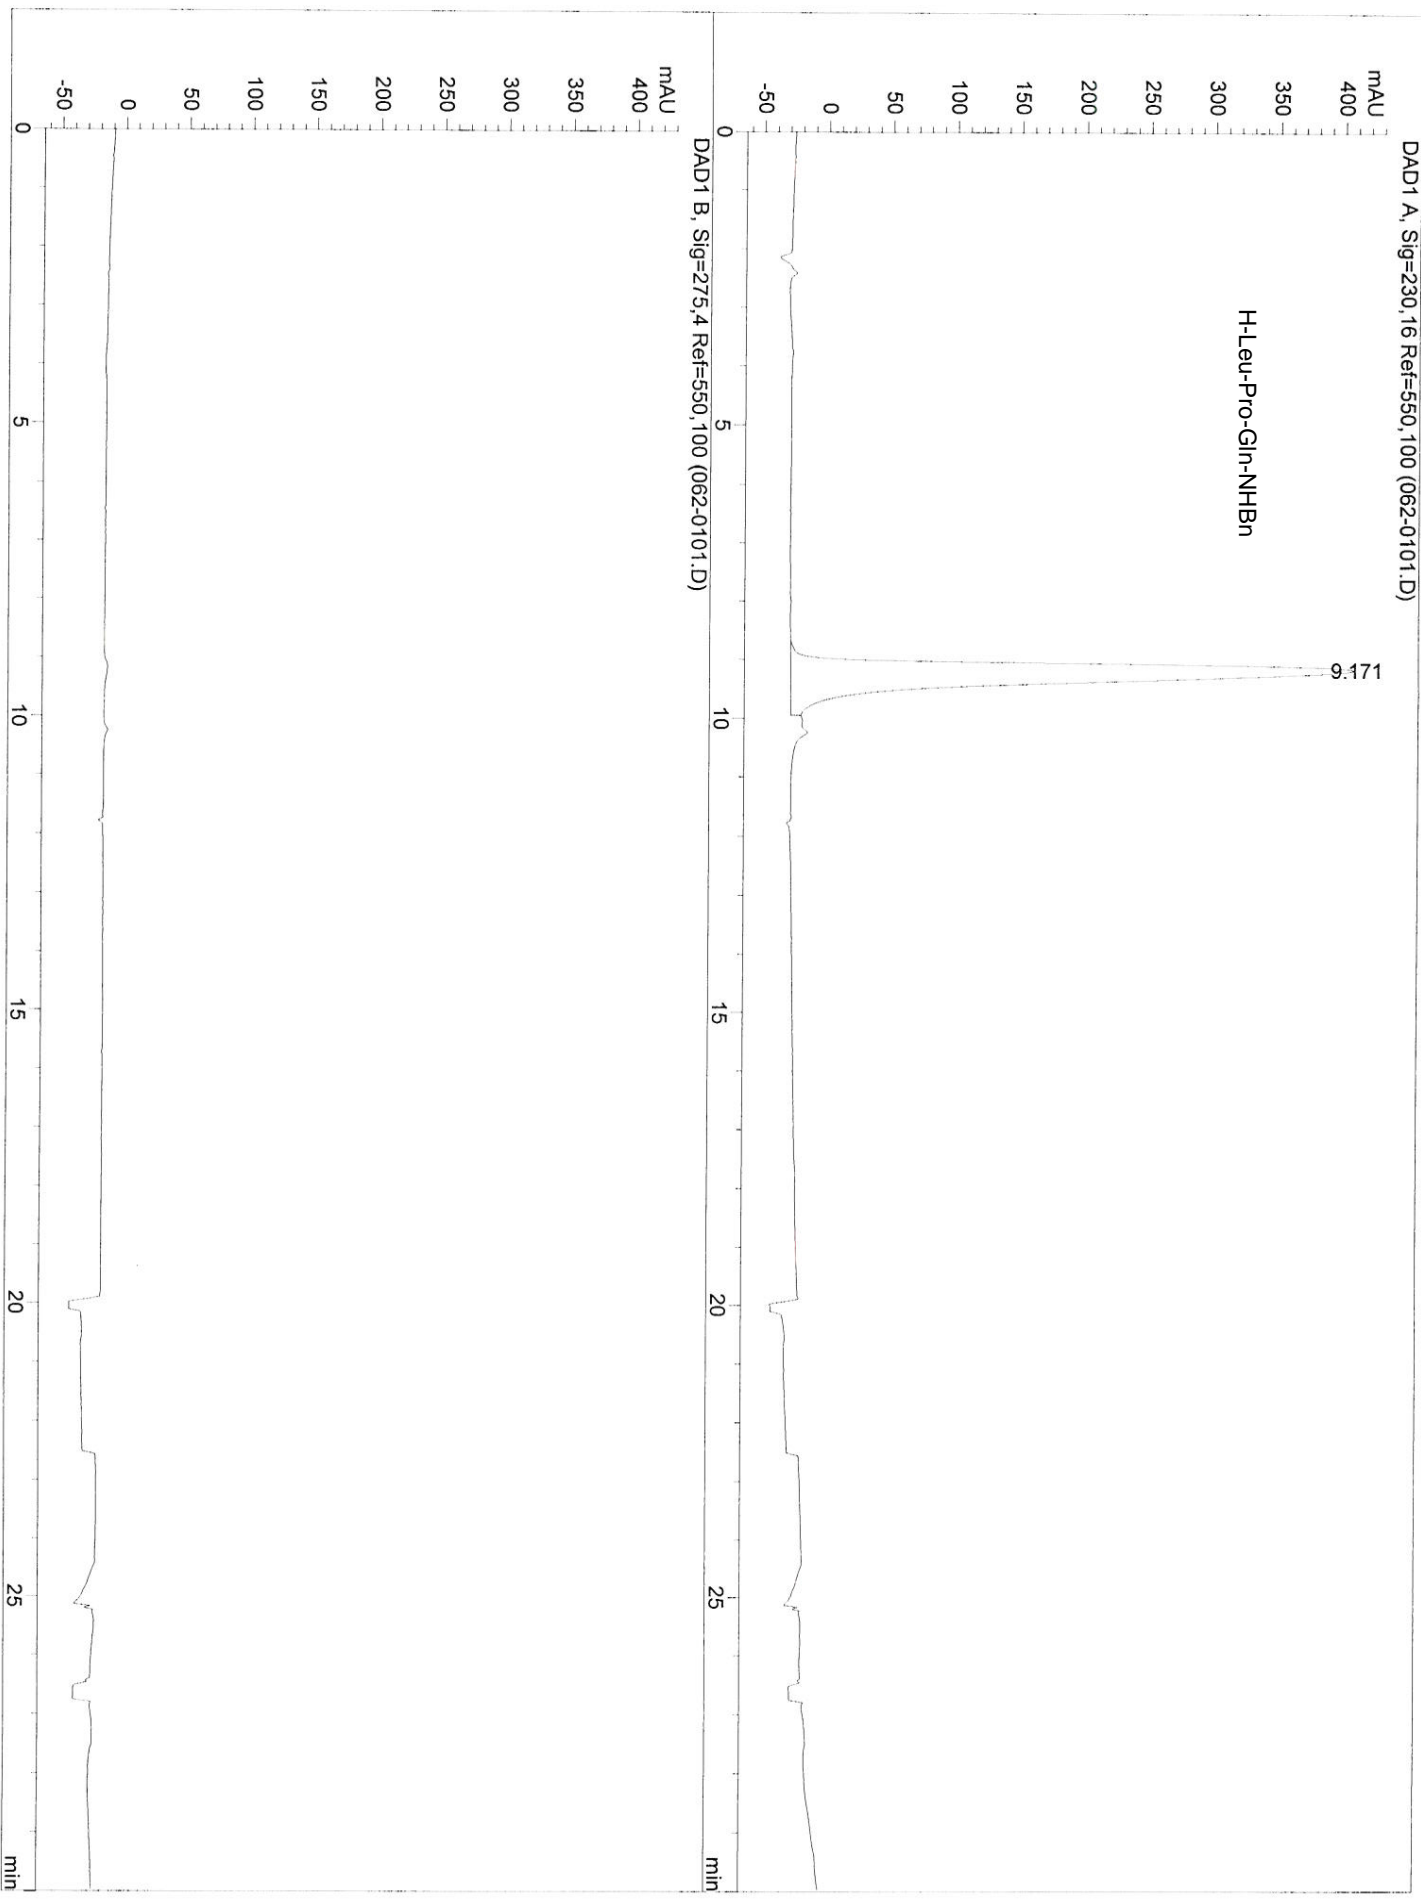

333

BP-PM6

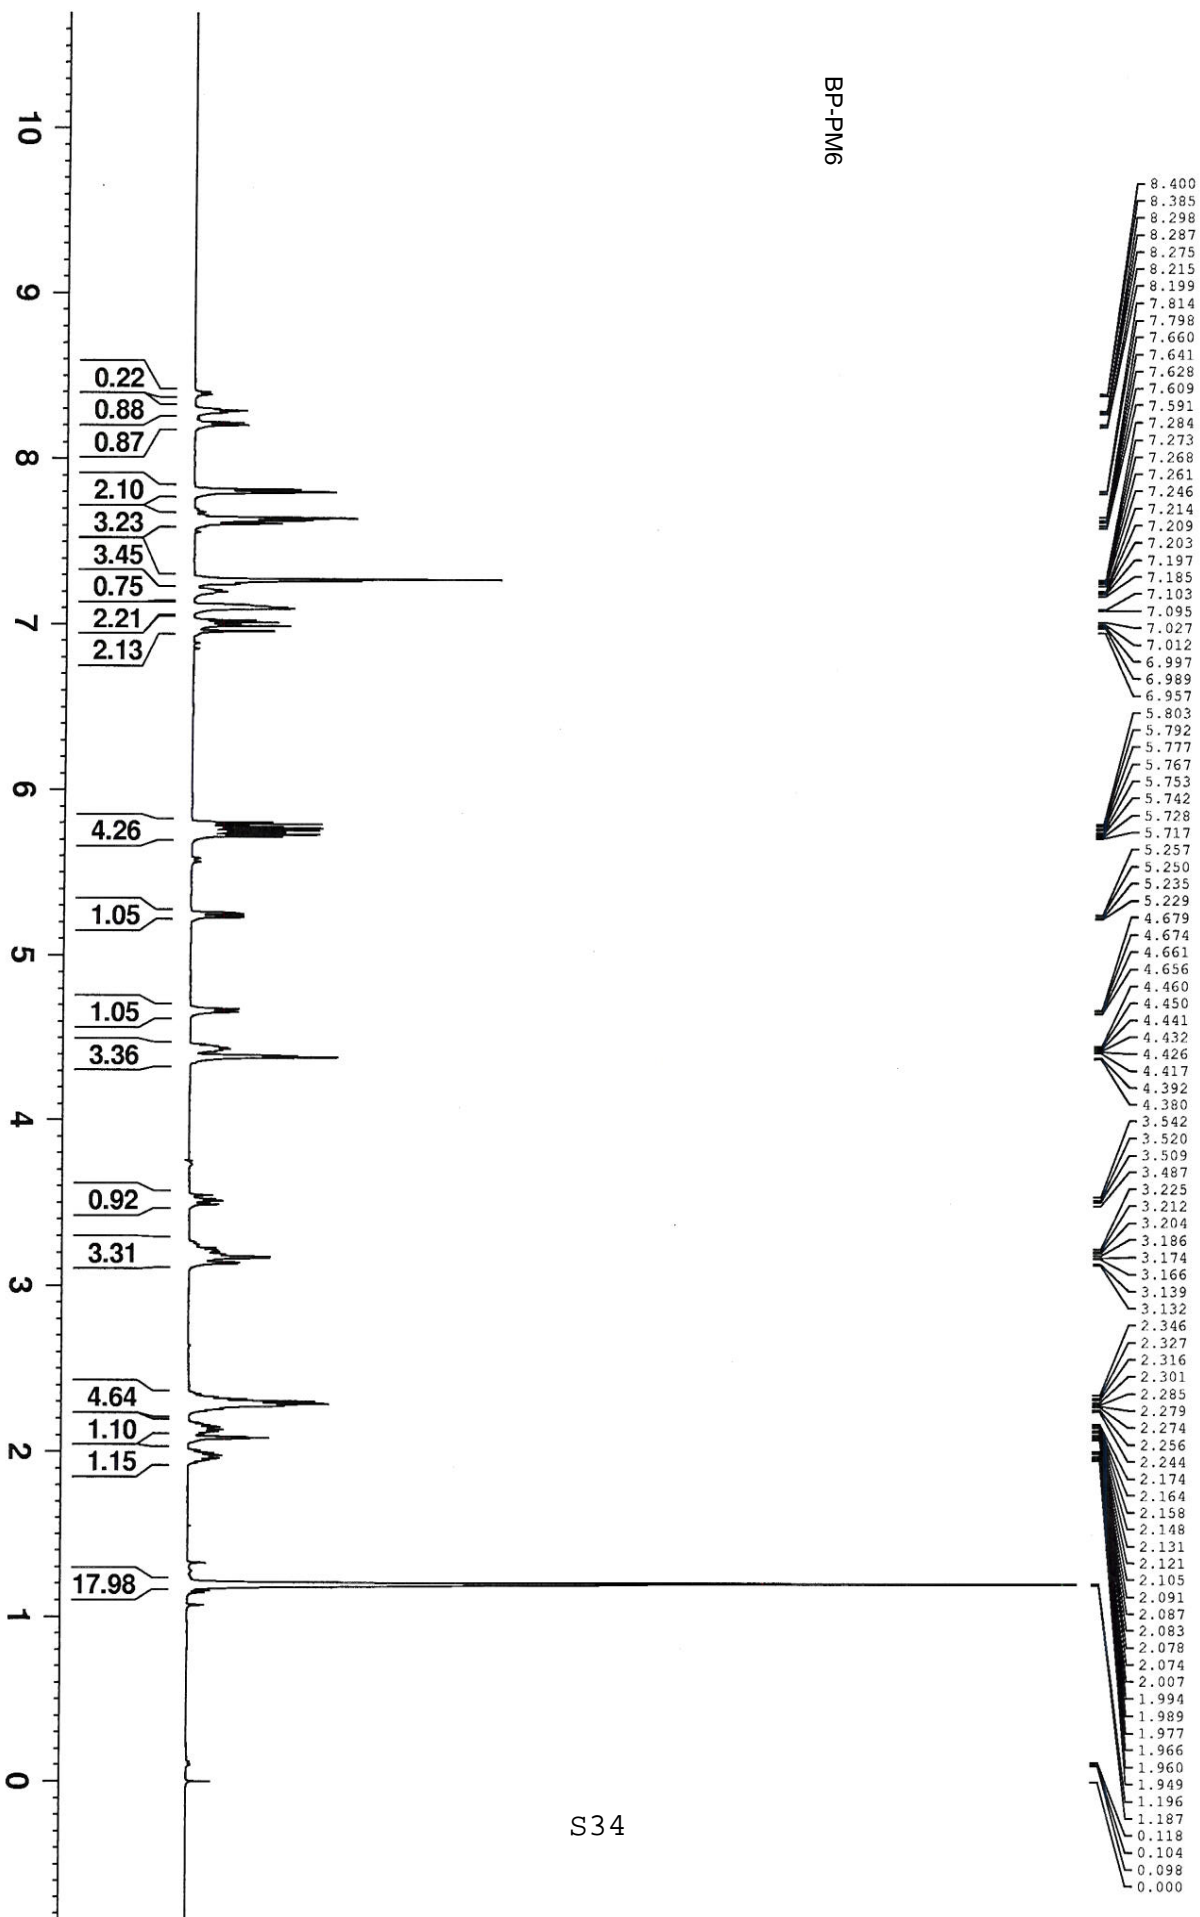

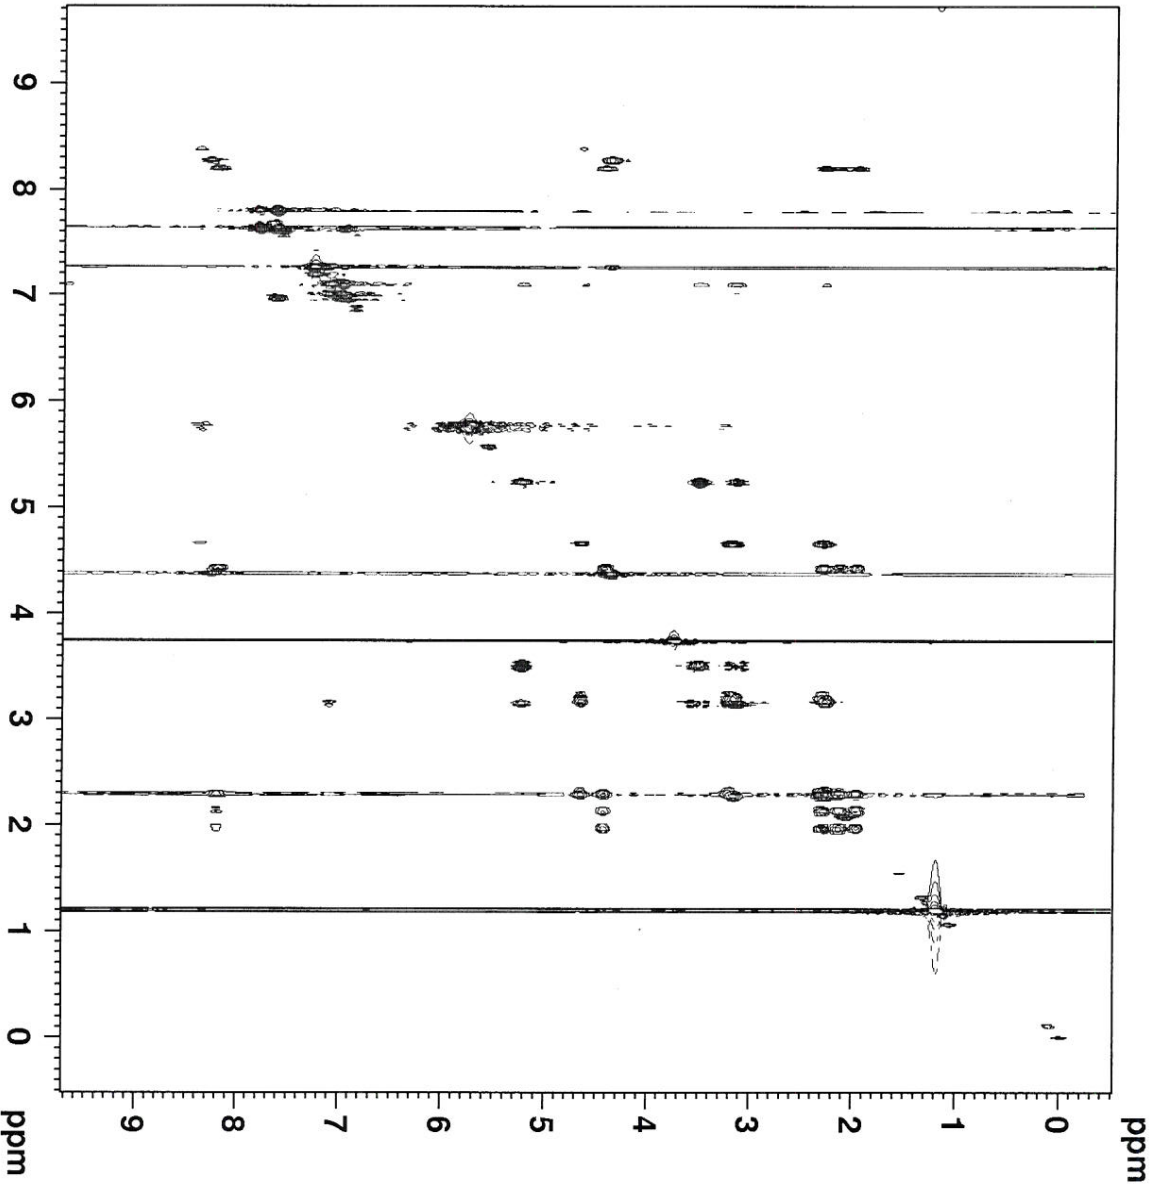

Current Data Parameters  
 NAME 67G052909  
 EXPNO 4  
 PROCNO 1

F2 - Acquisition Parameters  
 Date\_ 20030529  
 Time 11:28  
 INSTRUM spect  
 PROBD 5 mm TXI 1H/D-  
 PULPROG mvevzgp  
 TD 4096  
 ID CDCI3  
 SOLVENT CDCl3  
 NS 8  
 DS 16  
 SWH 5122.921 Hz  
 FWHM 1.359170 Hz  
 AQ 0.359170 sec  
 RG 201.12  
 DW 97.600 usec  
 DE 7.50 usec  
 TE 300.2 K

Channel Parameters  
 ND0 1  
 TD 256  
 SFO1 500.1323 MHz  
 FIDRES 20.011526 Hz  
 RM 10.243 ppm  
 FWHM 10.243 ppm  
 Echo-Antlecho  
 SI 2048  
 SF 500.1300000 MHz  
 WDW QSI  
 SSB 2  
 LB 0.00 Hz  
 GB 0  
 FC 1.00

Processing Parameters  
 SI 1024  
 MC2 echo-antlecho  
 SF 500.1300000 MHz  
 WDW QSI  
 SSB 2  
 LB 0.00 Hz  
 GB 0

GRADIENT CHANNEL  
 GPNM1 SINE 100  
 GPNM2 SINE 100  
 GPZ1 10.00 %  
 GPZ2 30.00 %  
 P16 1000.00 usec



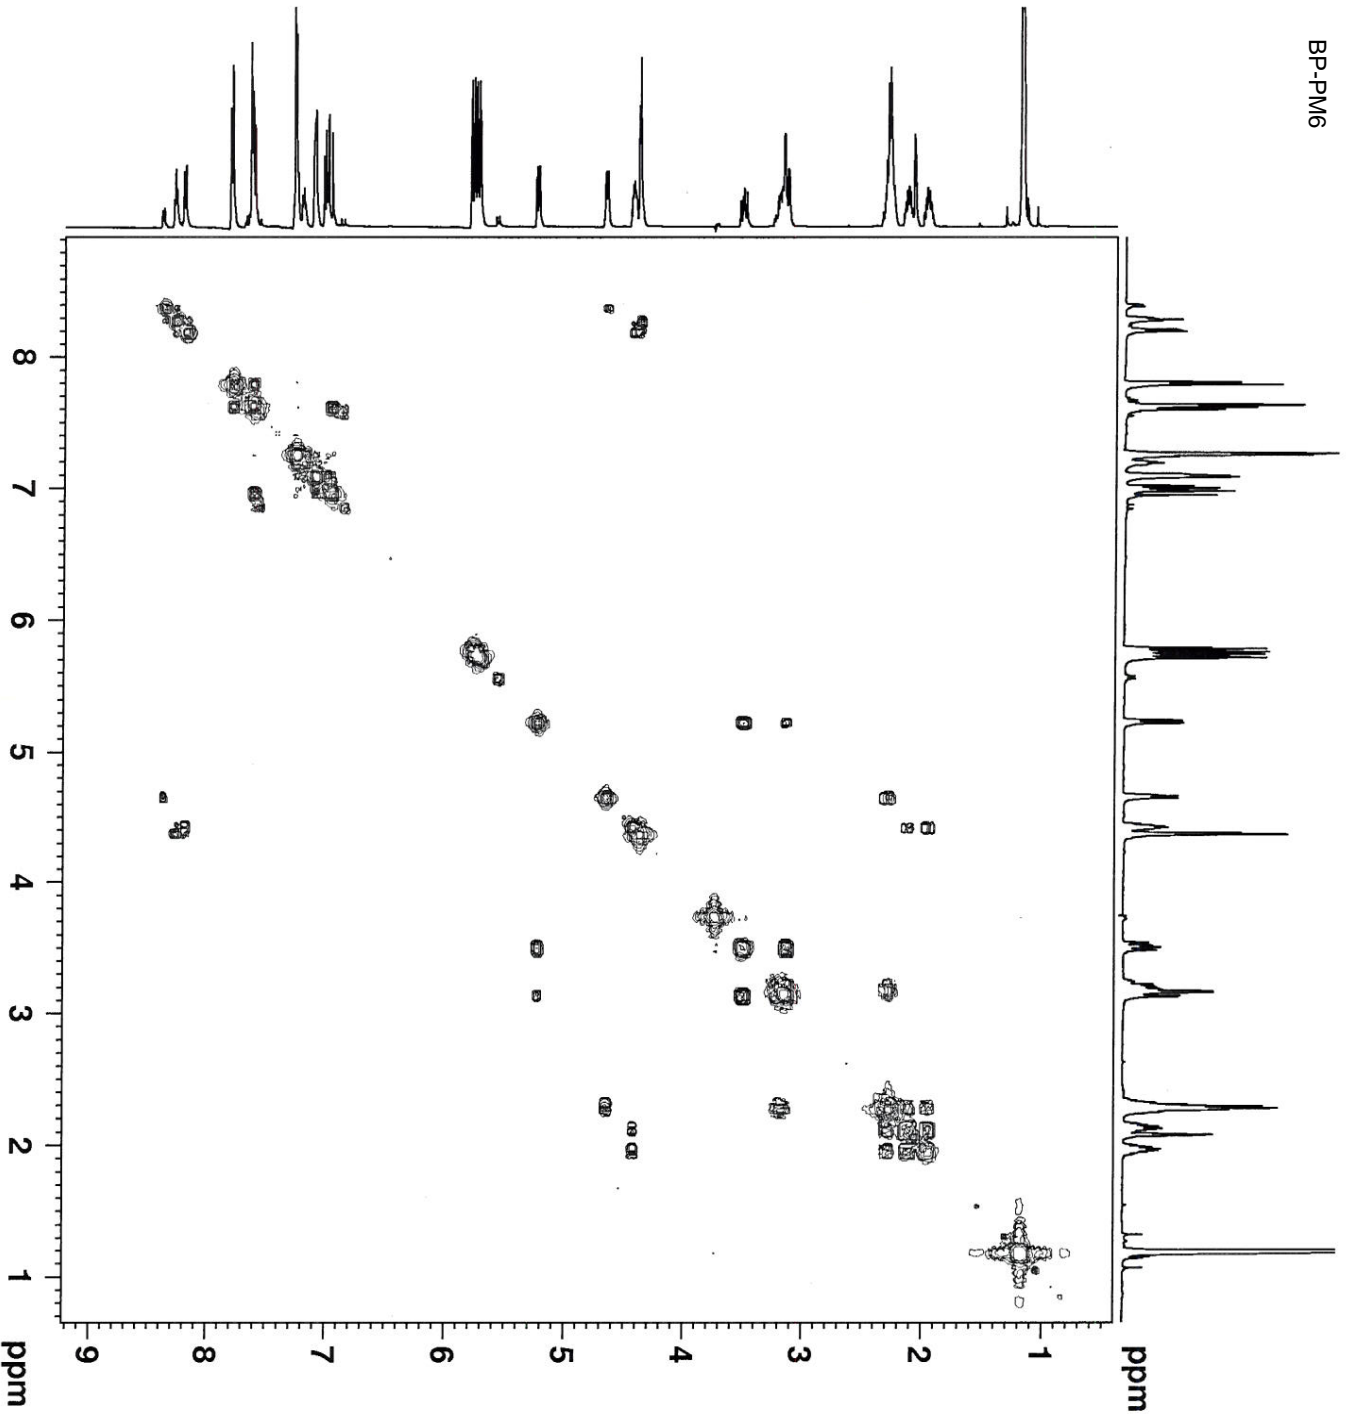

Current Data Parameters  
 NAME 67G052909  
 EXPNO 2  
 PROCNO 1

F2 - Acquisition Parameters  
 Date\_ 20090329  
 Time 11.16  
 INSTRUM spect  
 PROBHD 5 mm TXI 1H/D-  
 PULPROG cosygpgf  
 TD 2048  
 SOLVENT DMSO  
 NS 1  
 DS 8  
 SWH 6666.667 Hz  
 FIDRES 3.255208 Hz  
 AQ 0.1537250 sec  
 RG 203.2  
 DW 75.000 usec  
 DE 7.50 usec  
 TE 300.2 K  
 D0 0.00000300 sec  
 D1 1.48689198 sec  
 D13 0.00000400 sec  
 D16 0.00020000 sec  
 INO 0.00015000 sec

==== CHANNEL f1 =====  
 NUCL1 1H  
 P0 8.00 usec  
 F1 8.00 usec  
 PL1 -2.00 dB  
 SFO1 500.1330069 MHz

==== GRADIENT CHANNEL =====  
 GENAM1 SINE.100  
 GENAM2 SINE.100  
 GPZ1 10.00 %  
 GPZ2 10.00 %  
 P16 1000.00 usec

F1 - Acquisition parameters  
 ND0 1  
 TD 128  
 SFO1 500.133 MHz  
 FIDRES 52.083332 Hz  
 SW 13.330 ppm  
 FMODE QF

F2 - Processing parameters  
 SI 1024  
 SF 500.1300000 MHz  
 WDW SINE  
 SSB 0  
 LB 0.00 Hz  
 GB 0  
 PC 1.00

F1 - Processing parameters  
 SI 1024  
 MC2 QF  
 SF 500.1300000 MHz  
 WDW SINE  
 SSB 0  
 LB 0.00 Hz  
 GB 0



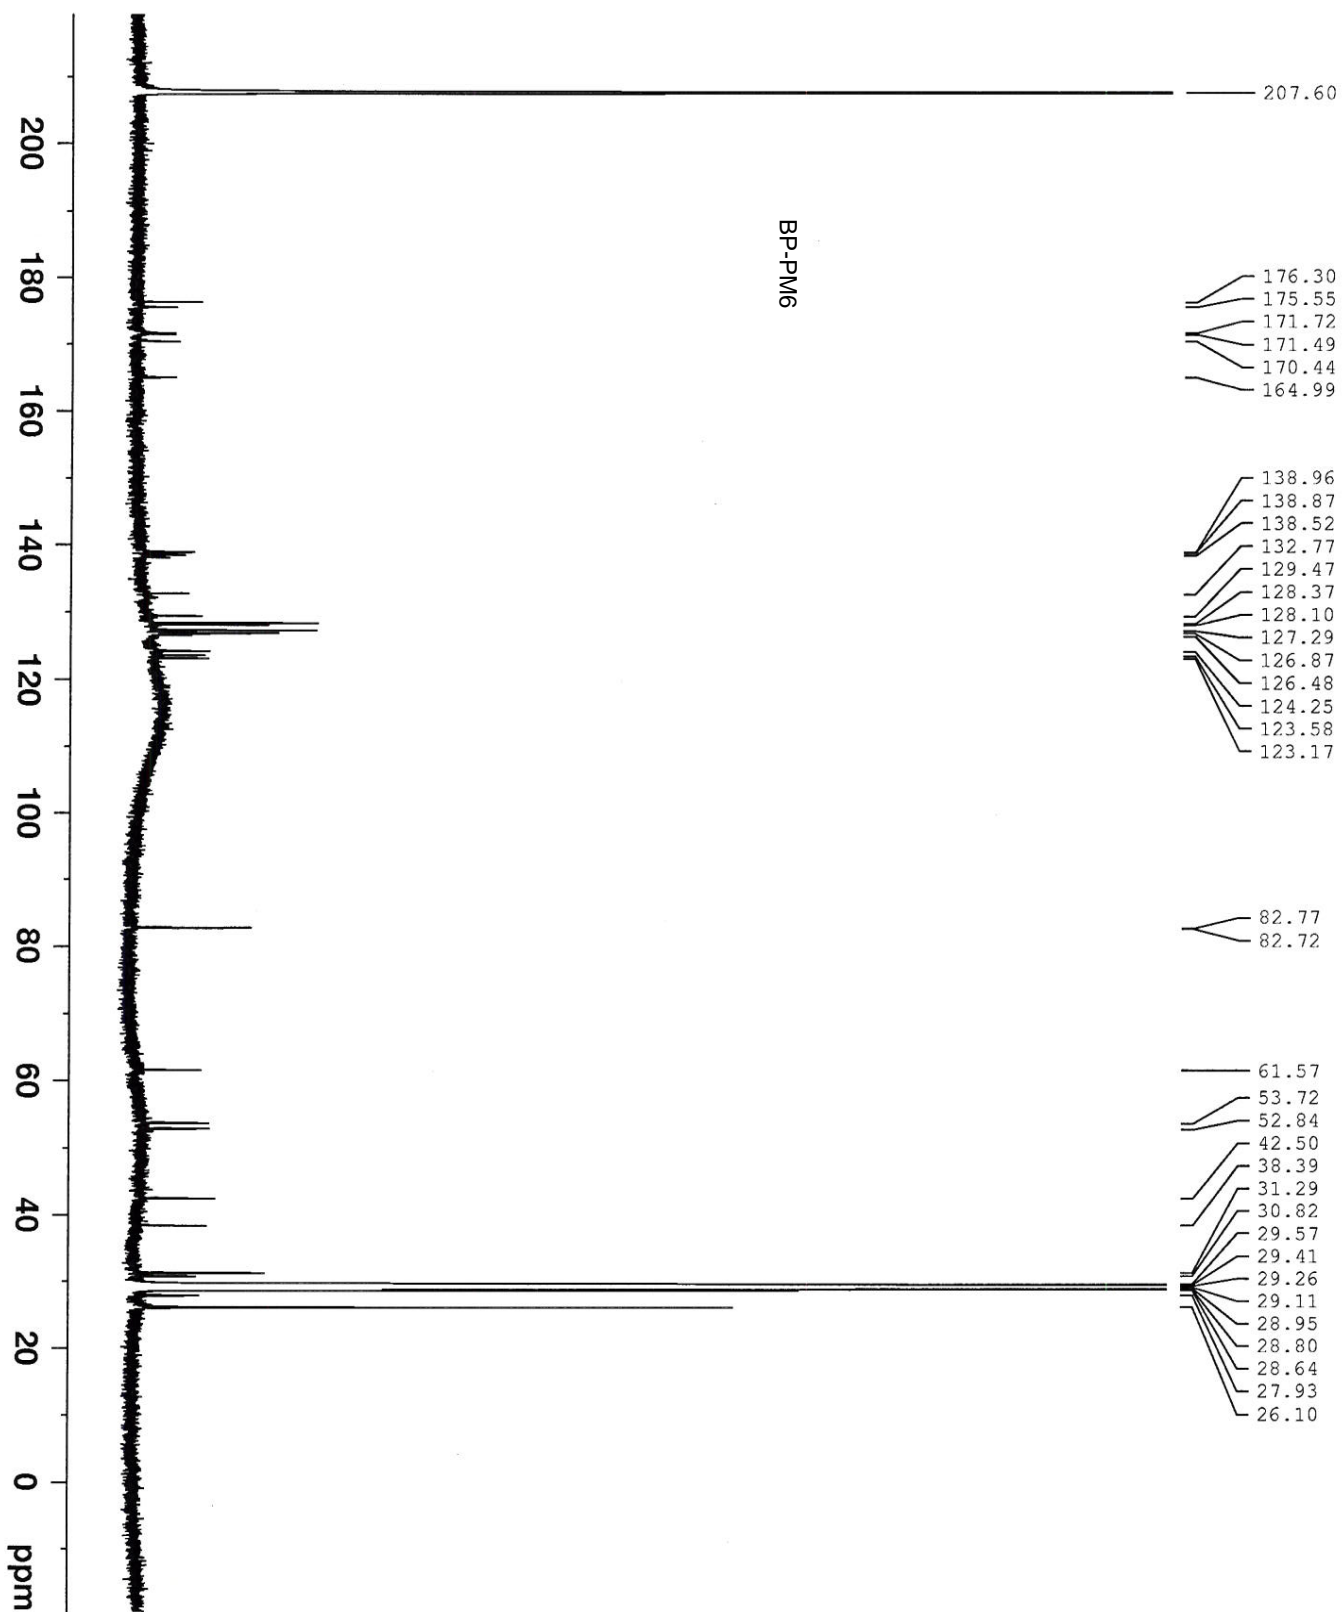

Current Data Parameters  
 NAME 67G\_3-1  
 EXPNO 2  
 PROCNO 1

F2 - Acquisition Param

Date\_ 20090523  
 Time 11.27  
 INSTRUM spect  
 PROEBD 5 mm TXI 1H/D-  
 PULPROG zgpg3c  
 TD 65536  
 SOLVENT CDCl3  
 NS 51200  
 DS 4

SWH 30030.025  
 FIDRES 0.458222  
 AQ 1.091241C  
 RG 32768  
 DW 16.65C  
 DE 7.5C  
 TE 298.2  
 D1 2.0000000C  
 d11 0.0300000C  
 DELTA 1.8999999E  
 TD0 1

==== CHANNEL F1 ===  
 NUC1 13C  
 P1 11.25  
 PL1 -5.5C  
 SFO1 125.7703643

==== CHANNEL F2 ===  
 CPDPRG2 waltz16  
 NUC2 1H  
 PCPD2 90.0C  
 PL2 -2.0C  
 PL12 18.5C  
 PL13 20.0C  
 SFO2 500.132000E

F2 - Processing paramet  
 SI 32768  
 SF 125.757789C  
 WDW EN  
 SSB C  
 LB 1.0C  
 GB C  
 PC 1.4C

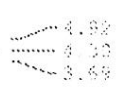

BP-PM6

Current Data Parameters  
 NAME 67G\_3-1  
 EXPNO 5  
 PROCNO 1

F2 - Acquisition Parameters

Date\_ 20090525  
 Time 10.43  
 INSTRUM spect  
 PROBHD 5 mm TXI 1H/D-  
 PULPROG zgpg30  
 TD 65536  
 SOLVENT Acetone  
 NS 16  
 DS 4  
 SWH 80645.164 Hz  
 FIDRES 1.230548 Hz  
 AQ 0.4063794 sec  
 RG 20642.5  
 DW 6.200 usec  
 DE 7.50 usec  
 TE 298.2 K  
 D1 2.00000000 sec  
 d11 0.03000000 sec  
 DELTA 1.89999998 sec  
 TD0 1

CHANNEL F1

NUC1 31P  
 P1 15.00 usec  
 PL1 -4.50 dB  
 SFO1 202.4462121 MHz

CHANNEL F2

CPDPRG2 waltz16  
 NUC2 1H  
 PCPD2 90.00 usec  
 PL2 -2.00 dB  
 PL12 18.50 dB  
 PL13 20.00 dB  
 SFO2 500.1320005 MHz

F2 - Processing parameters

SI 32768  
 SF 202.4563350 MHz  
 WDW EM  
 SSB 0  
 GB 0  
 PC 1.00 Hz  
 AG 0  
 HF 1.40

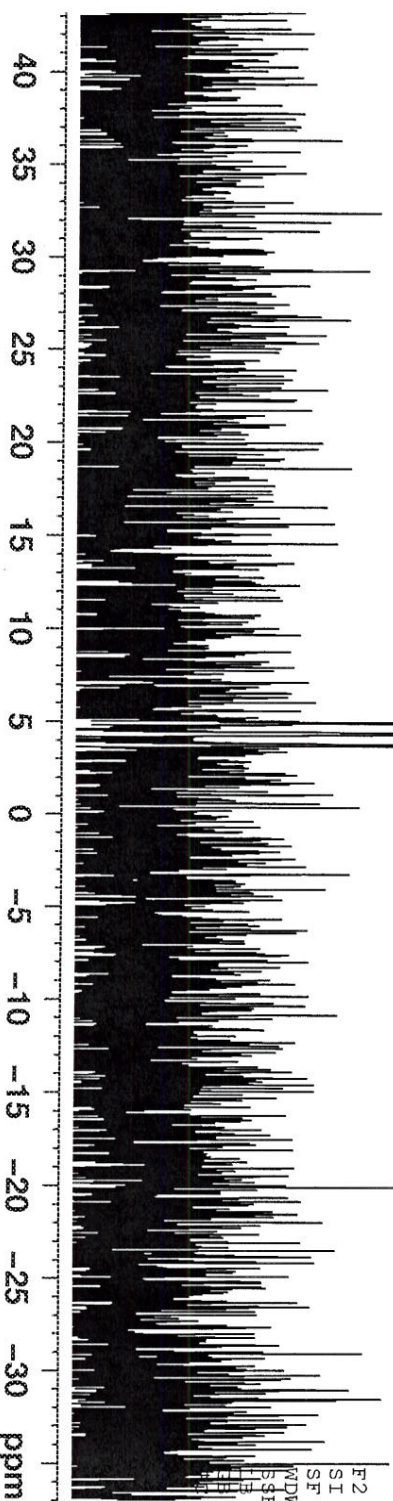

BP-PM6

-109.12  
-109.56

-103 -104 -105 -106 -107 -108 -109 -110 -111 -112 -113 ppm

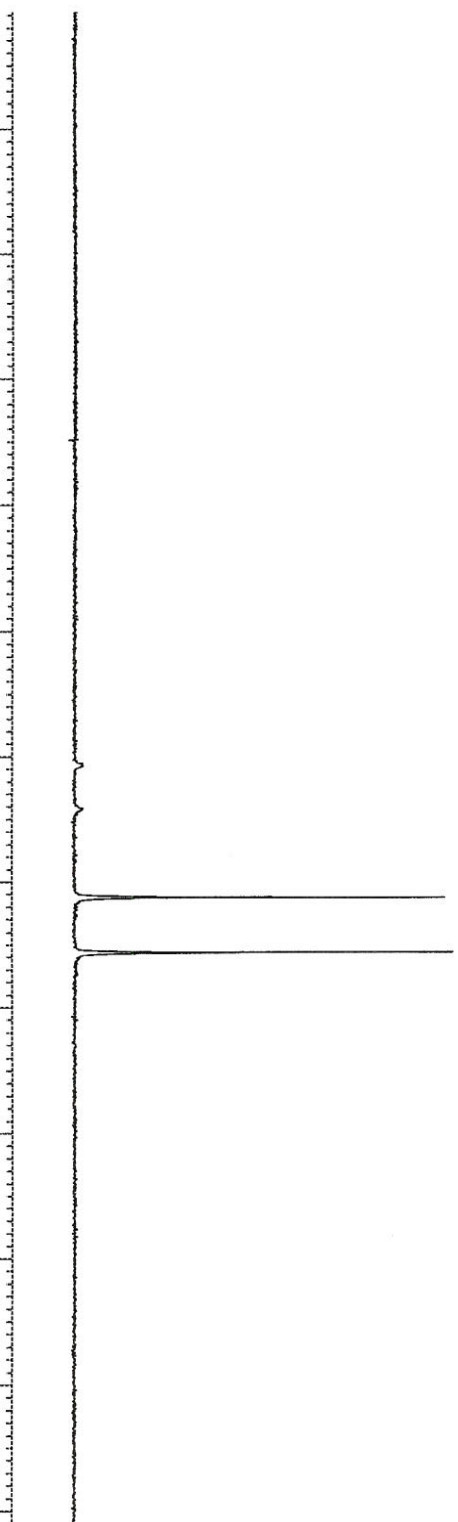

Current Data Parameters  
NAME 67G.1  
EXPNO 7  
PROCNO 1

F2 - Acquisition Parameters  
Date\_ 20090525  
Time 11.15

INSTRUM spect  
PROBHD 5 mm QNP 1H/19  
PULPROG zgpg30  
TD 131072  
SOLVENT CDCl3

NS 16  
DS 4  
SWH 6757.570 Hz  
FIDRES 0.51450 Hz  
AQ 0.969928 sec  
RG 7400  
DWE 7.400 usec  
TE 300.2 K

DE 6.00 usec  
TE 300.2 K  
D1 1.0000000 sec  
d11 0.0300000 sec  
d12 0.0000200 sec  
TDC 1

CHANNEL F1

NUC1 19F  
P1 12.00 usec  
PL1 -4.00 dB  
SFO1 282.3761148 MHz

CHANNEL F2

CPDPRG2 waltz16  
NUC2 1H  
PCPD2 100.00 usec  
PL2 -1.00 dB  
PL12 19.00 dB  
SFO2 300.1312005 MHz

F2 - Processing parameters

SI 85336  
SF 282.4043520 MHz  
WDW EM  
SS 0  
GB 0  
PC 1.00

DAD1 A, Sig=230.16 Ref=550.100 (087-0701.D)

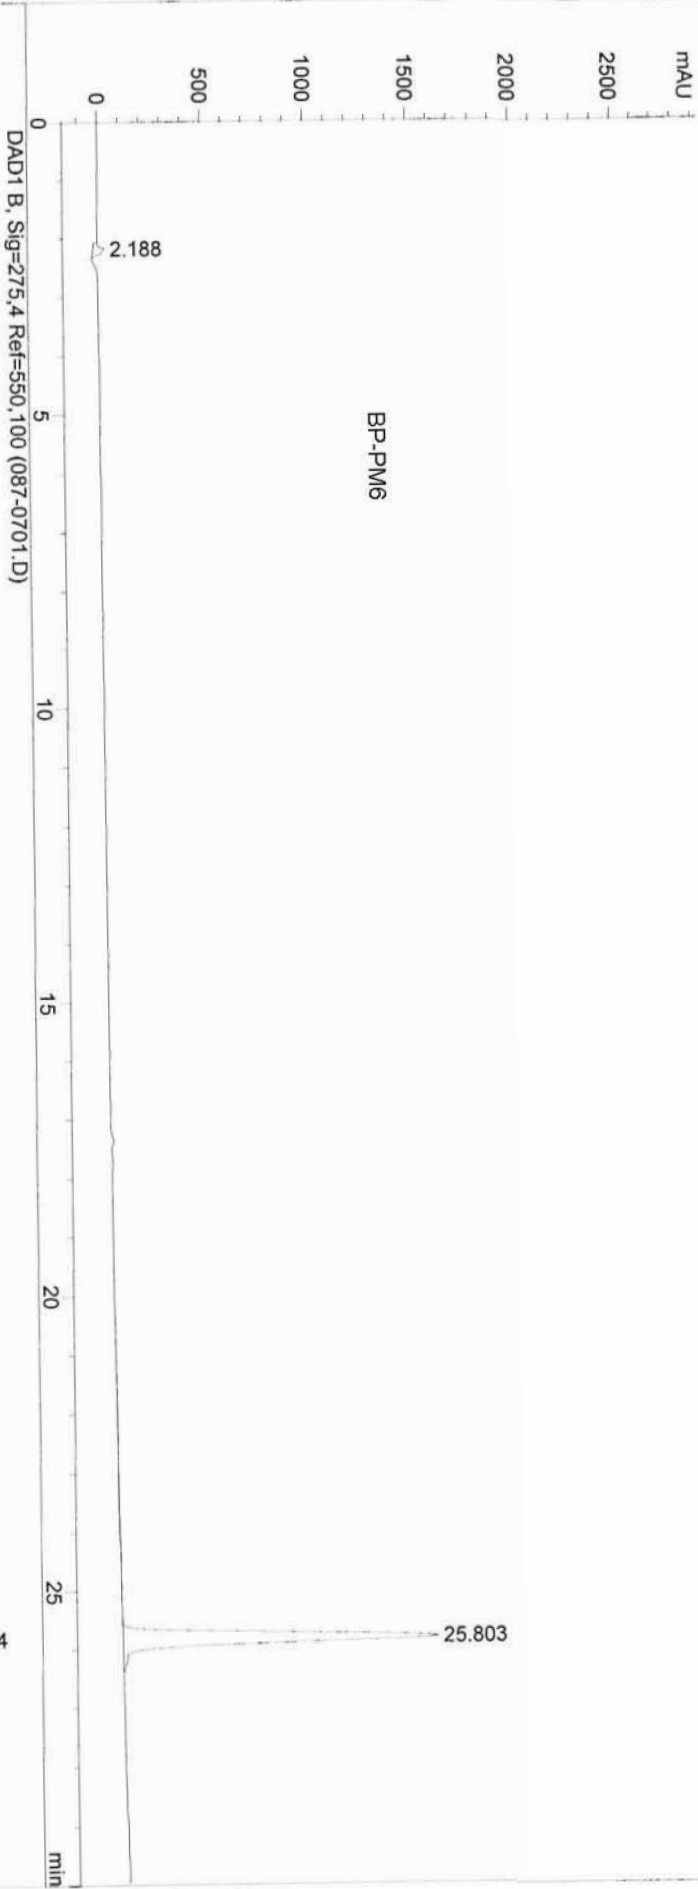

BP-PM6

DAD1 B, Sig=275.4 Ref=550.100 (087-0701.D)

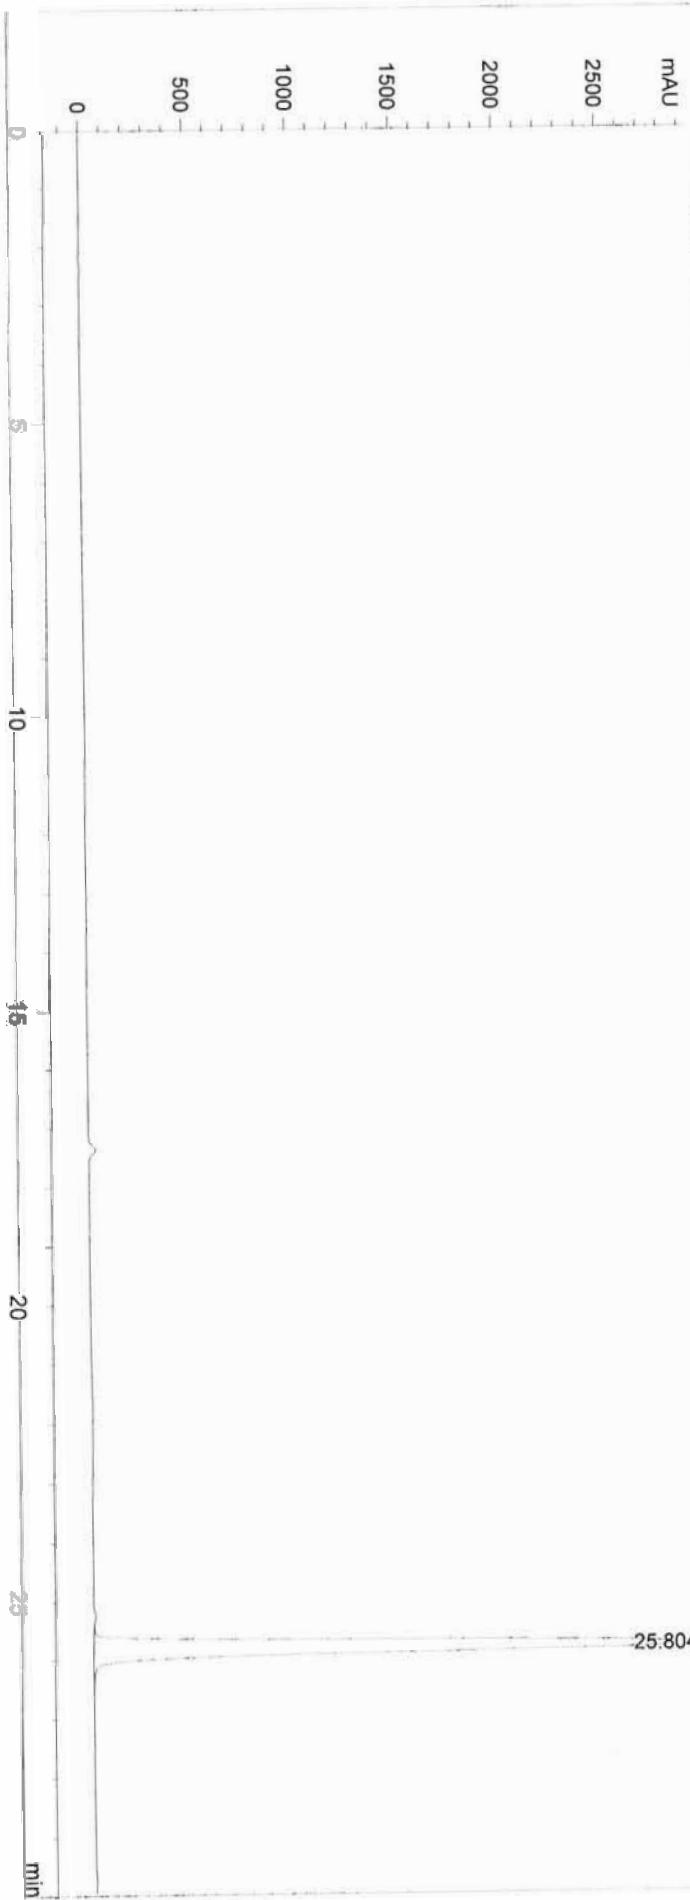

S40

BP-PM279G

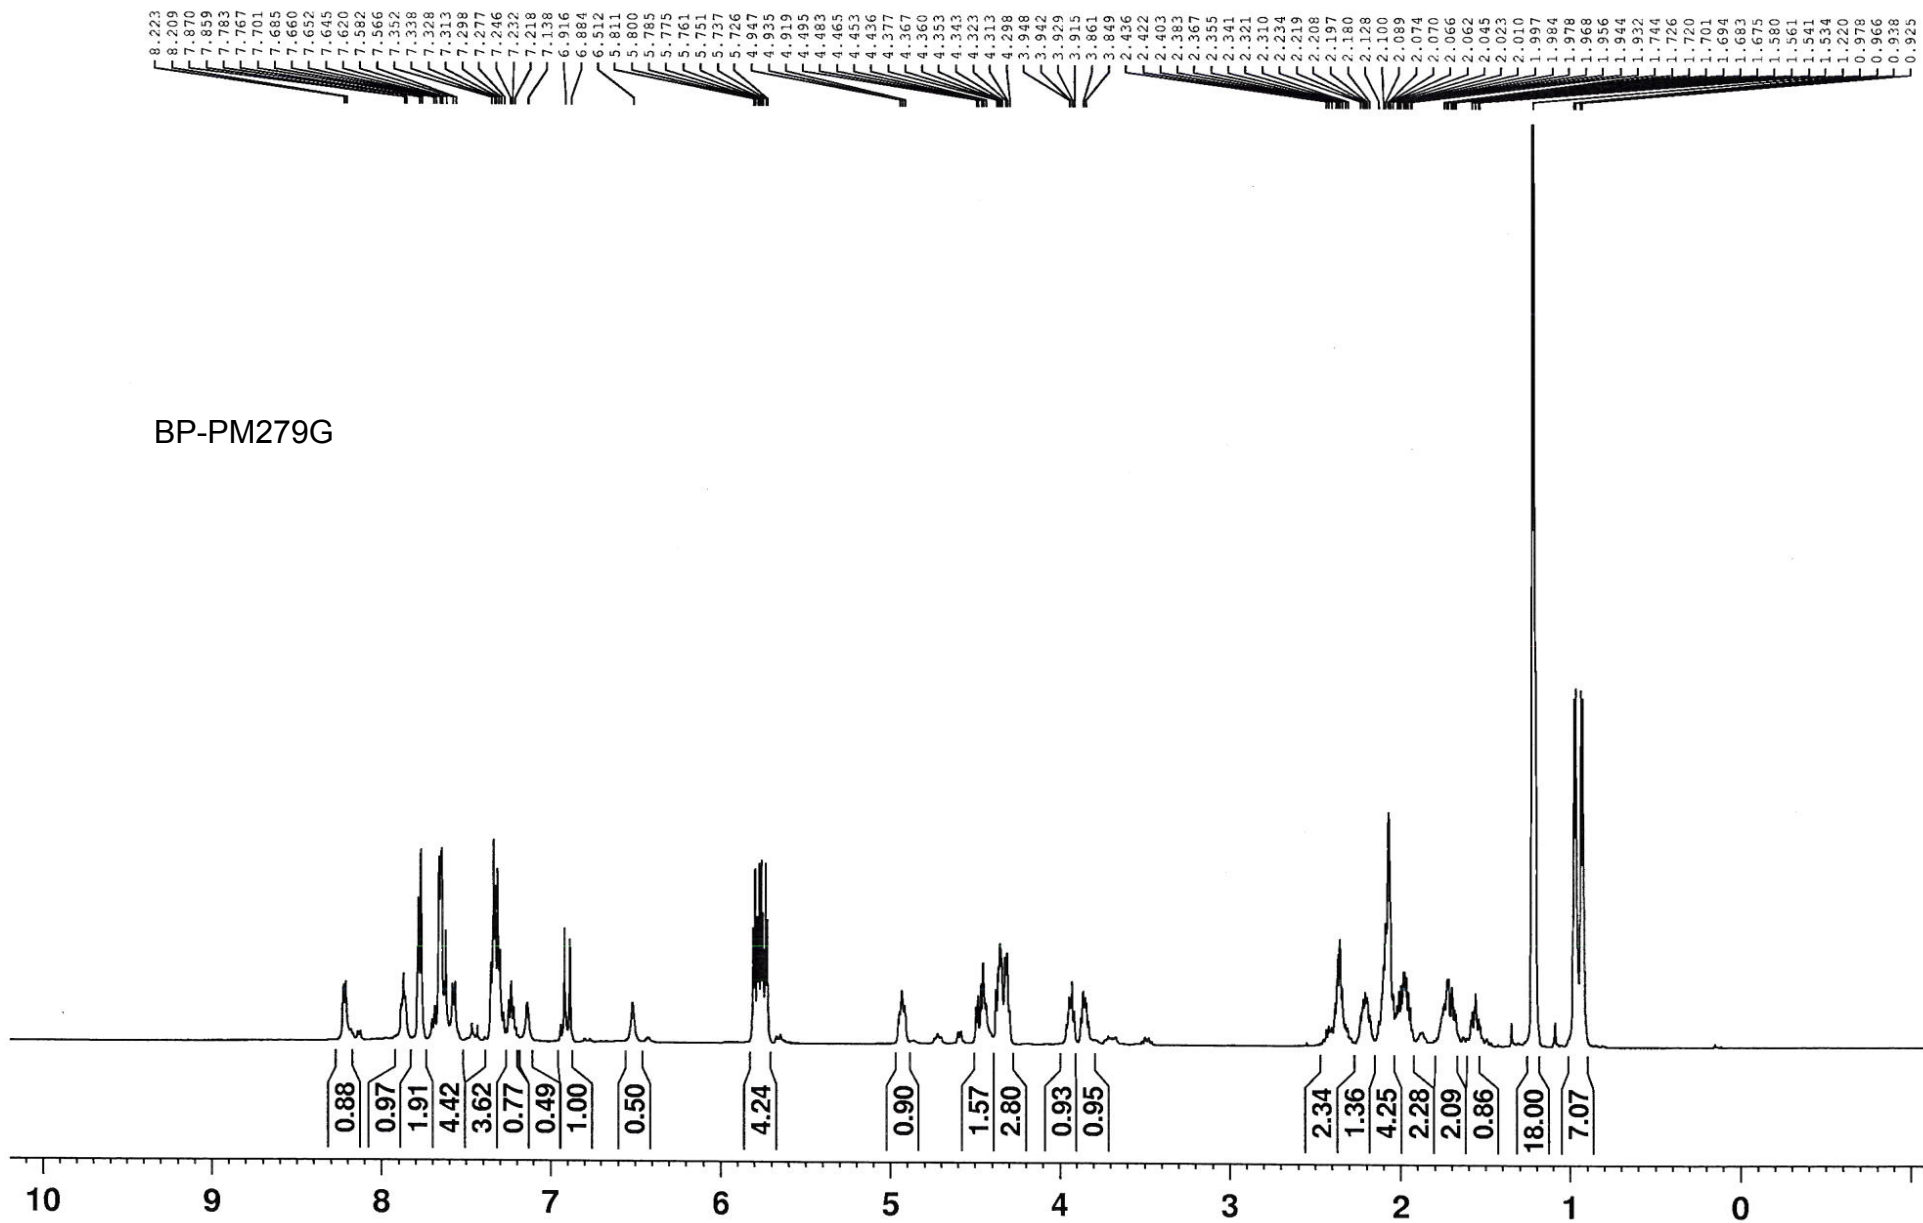

BP-PM279G

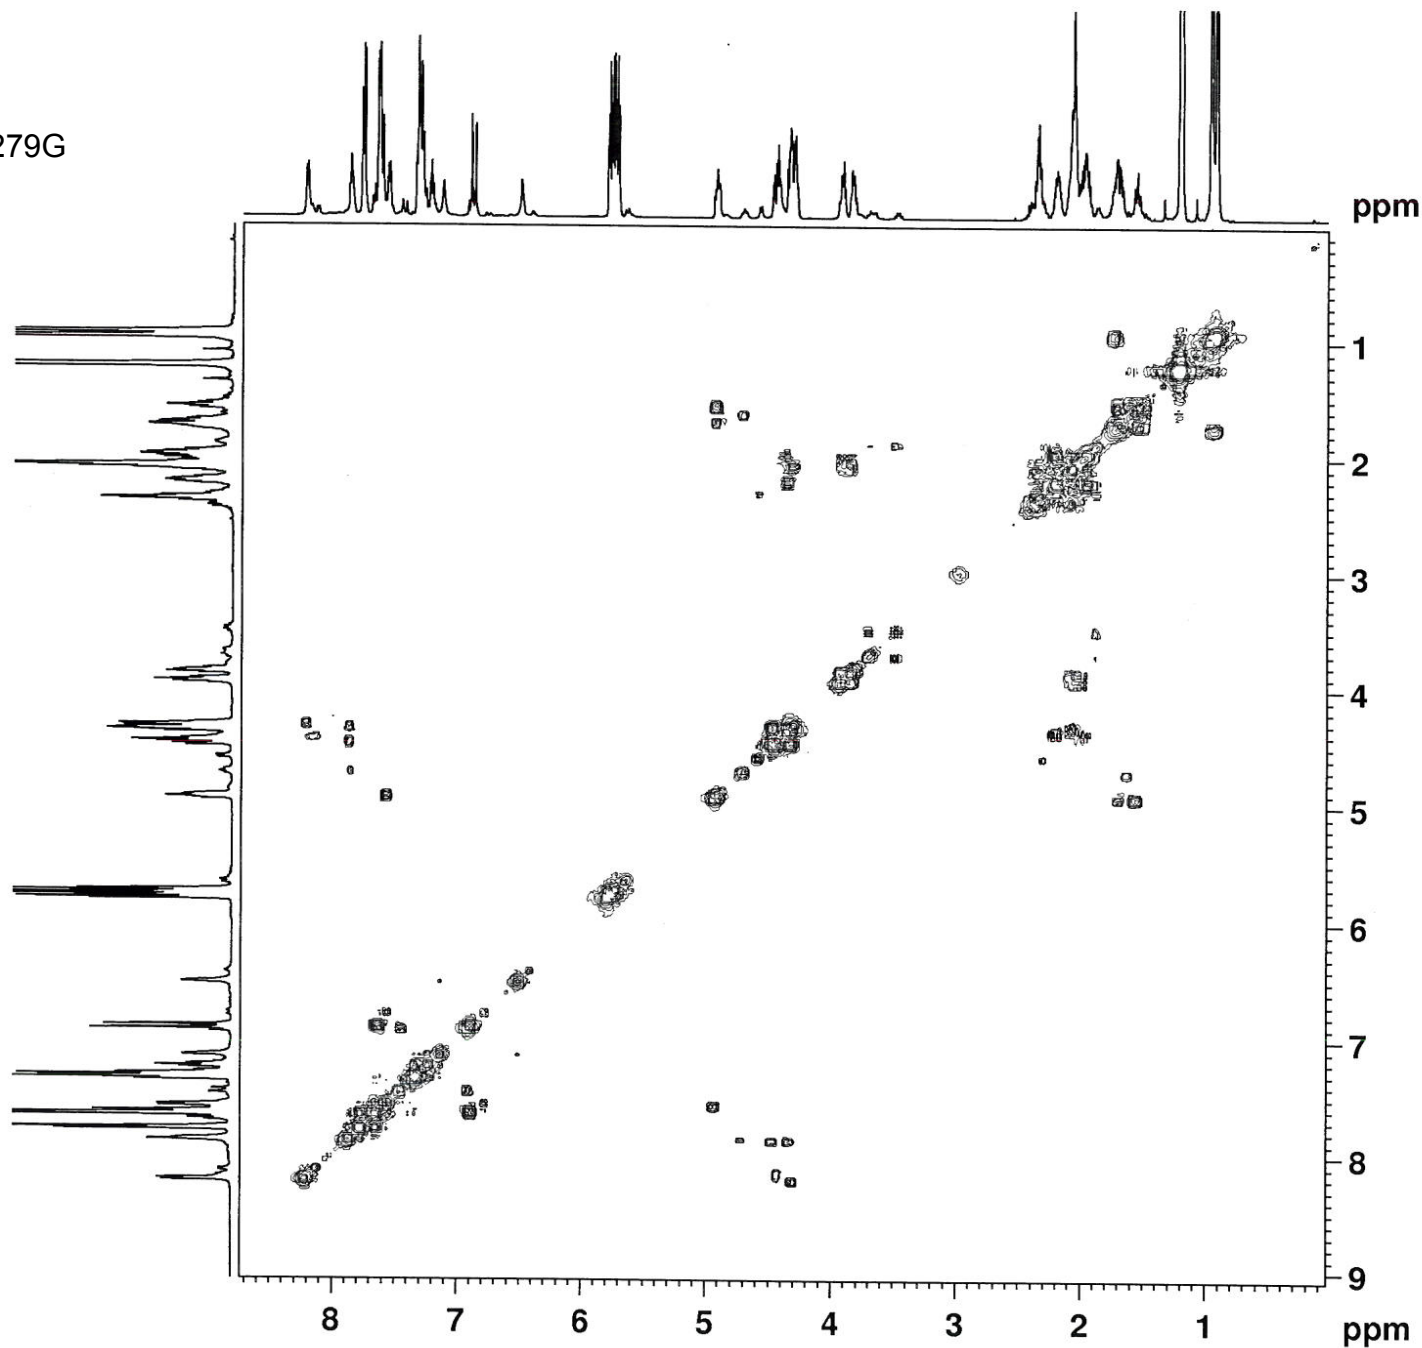

Current Data Parameters  
NAME 279G052709  
EXPNO 2  
PROCNO 1

F2 - Acquisition Parameters  
Date\_ 20090528  
Time 11.01  
INSTRUM spect  
PROBHD 5 mm TXI 1H/D-  
PULPROG cosygpgf  
TD 2048  
SOLVENT DMSO  
NS 1  
DS 8  
SWH 6666.667 Hz  
FIDRES 3.255208 Hz  
AQ 0.1537250 sec  
RG 101.6  
DW 75.000 usec  
DE 7.50 usec  
TE 300.2 K  
d0 0.00000300 sec  
d1 1.48689198 sec  
d13 0.00000400 sec  
d16 0.00020000 sec  
IN0 0.00015000 sec

==== CHANNEL f1 =====  
NUC1 1H  
P0 8.00 usec  
P1 8.00 usec  
PL1 -2.00 dB  
SFO1 500.1330069 MHz

===== GRADIENT CHANNEL =====  
GPNAM1 SINE.100  
GPNAM2 SINE.100  
GPZ1 10.00 %  
GPZ2 10.00 %  
P16 1000.00 usec

F1 - Acquisition parameters  
ND0 1  
TD 128  
SFO1 500.133 MHz  
FIDRES 52.083332 Hz  
SW 13.330 ppm  
FRMODE QF

F2 - Processing parameters  
SI 1024  
SF 500.1300000 MHz  
WDW SINE  
SSB 0  
LB 0.00 Hz  
GB 0  
PC 1.00

F1 - Processing parameters  
SI 1024  
MC2 QF  
SF 500.1300000 MHz  
WDW SINE  
SSB 0  
LB 0.00 Hz  
GB 0

BP-PM279G

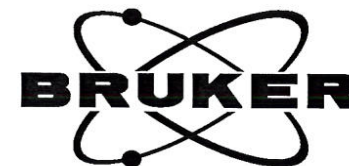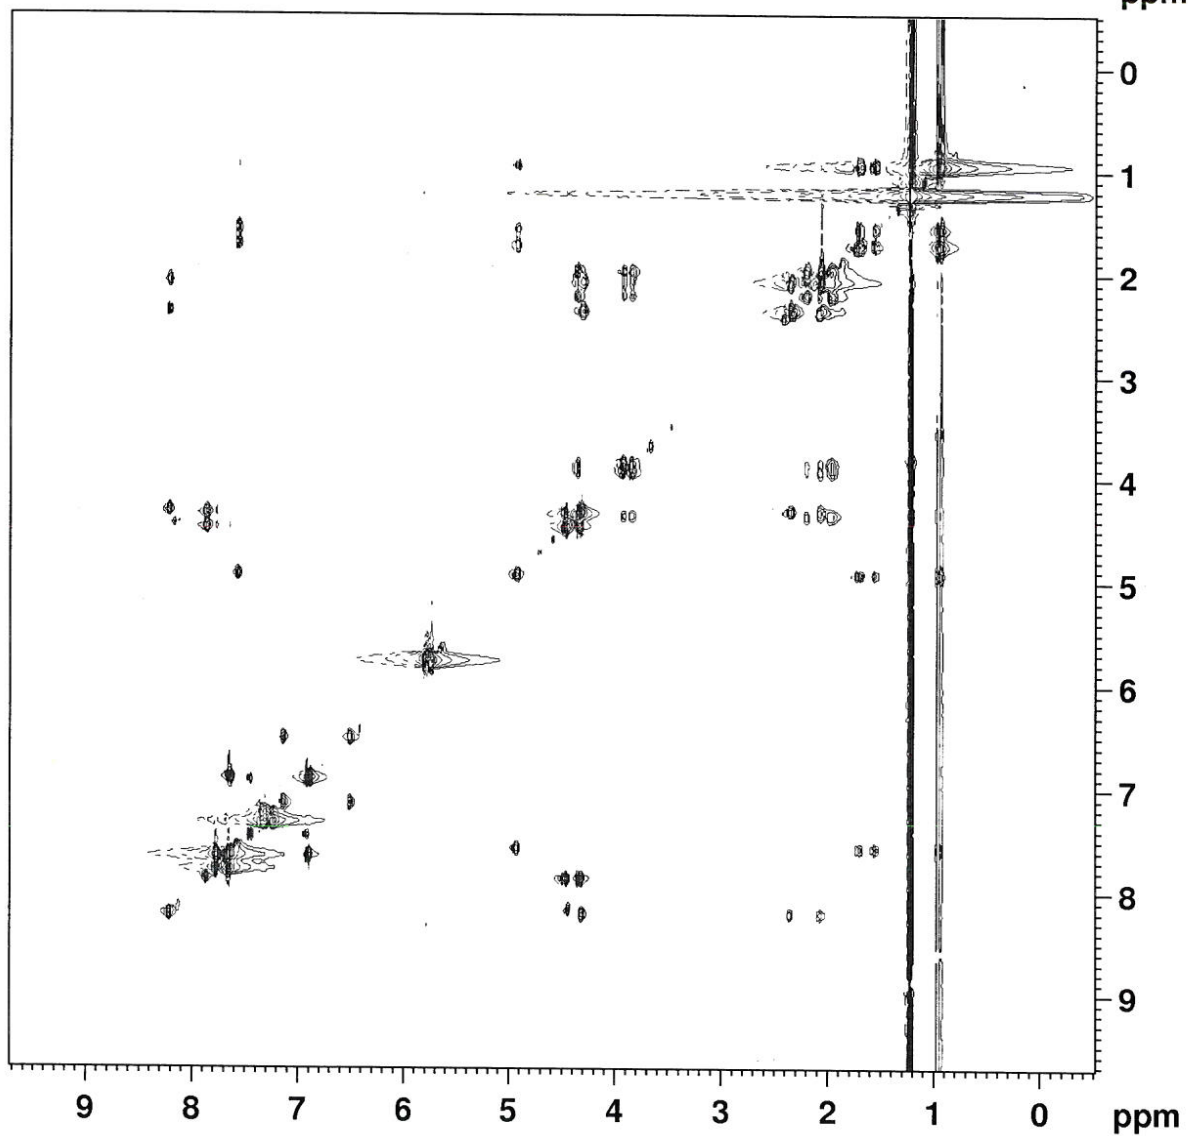

ppm

```
Current Data Parameters
NAME      279G052709
EXPNO     3
PROCNO    1

F2 - Acquisition Parameters
Date_     20090528
Time      11.07
INSTRUM   spect
PROBHD    5 mm TXI 1H/D-
PULPROG   mlevup
TD         4096
SOLVENT   CDCl3
NS         8
DS         16
SWH        5122.951 Hz
FIDRES     1.250720 Hz
AQ         0.3999172 sec
RG         128
DW         97.600 usec
DE         7.50 usec
TE         300.2 K
d0         0.00000300 sec
d1         2.00000000 sec
d9         0.07000000 sec
d11        0.03000000 sec
d12        0.00002000 sec
d16        0.00020000 sec
DELTA     0.00119791 sec
DELTA1    0.00120800 sec
FACTOR1   5
IN0       0.00019520 sec
l1        6
SCALEP    30
ST1CNT    128

----- CHANNEL f1 -----
NUC1      1H
P1        8.00 usec
p2        16.00 usec
p5        23.34 usec
P6        35.00 usec
p7        70.00 usec
P17       2500.00 usec
PL1       -2.00 dB
PL10      10.82 dB
SFO1      500.1323022 MHz

===== GRADIENT CHANNEL =====
GPNAM1    SINE.100
GPNAM2    SINE.100
GPZ1      30.00 %
GPZ2      30.00 %
P16       1000.00 usec

F1 - Acquisition parameters
ND0       1
TD         256
SFO1      500.1323 MHz
FIDRES     20.011526 Hz
SW         10.243 ppm
FnMODE    Echo-Antiecho

F2 - Processing parameters
SI         2048
SF         500.1300000 MHz
WDW        QSINE
SSB        2
LB         0.00 Hz
GB         0
PC         1.40

F1 - Processing parameters
SI         1024
MC2        echo-antiecho
SF         500.1300000 MHz
WDW        QSINE
SSB        2
LB         0.00 Hz
GB         0
```

S43



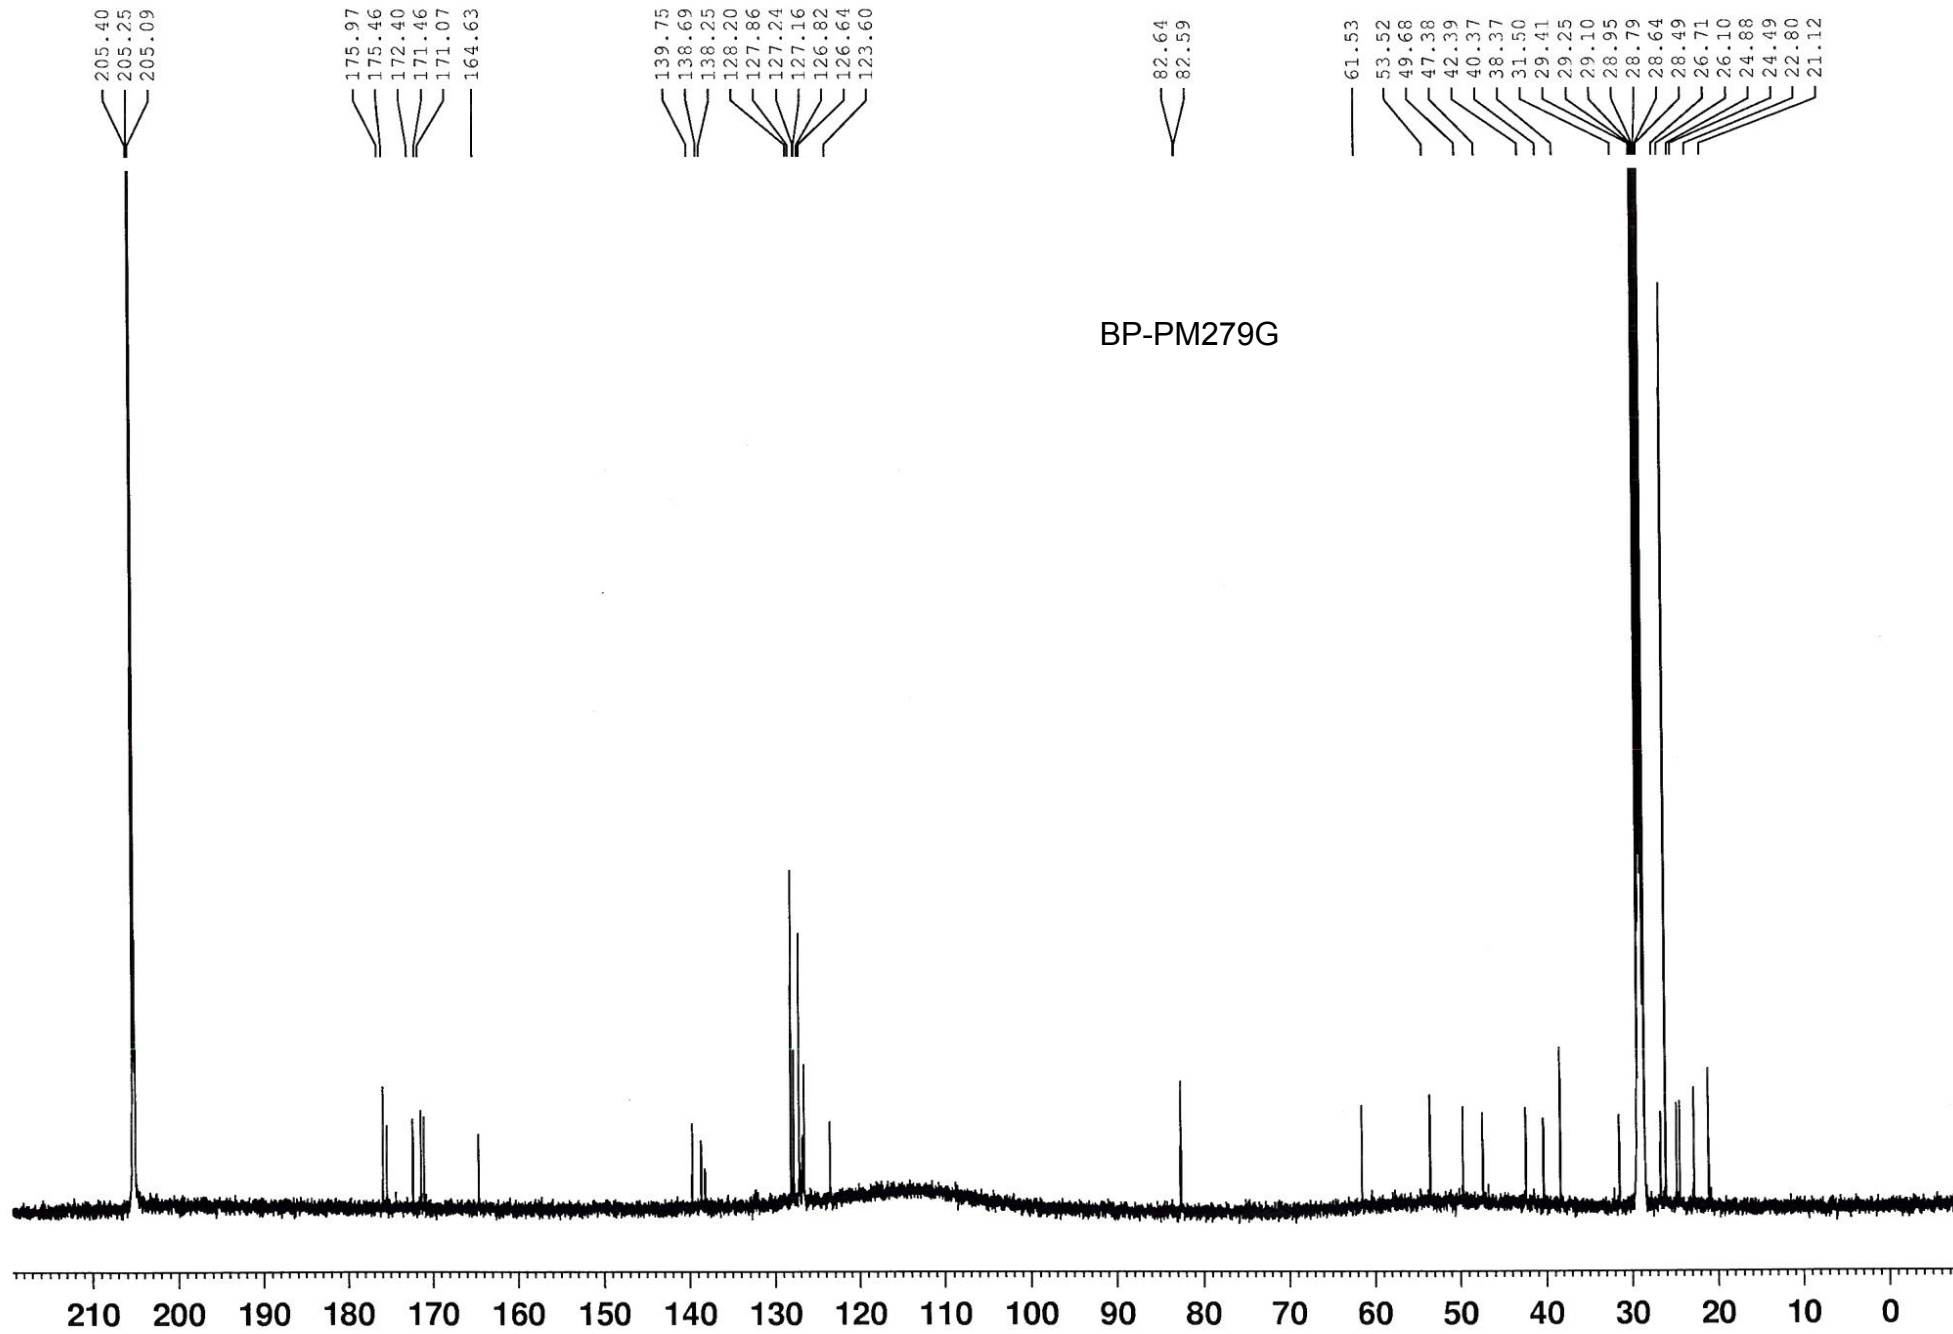



BP-PM279G

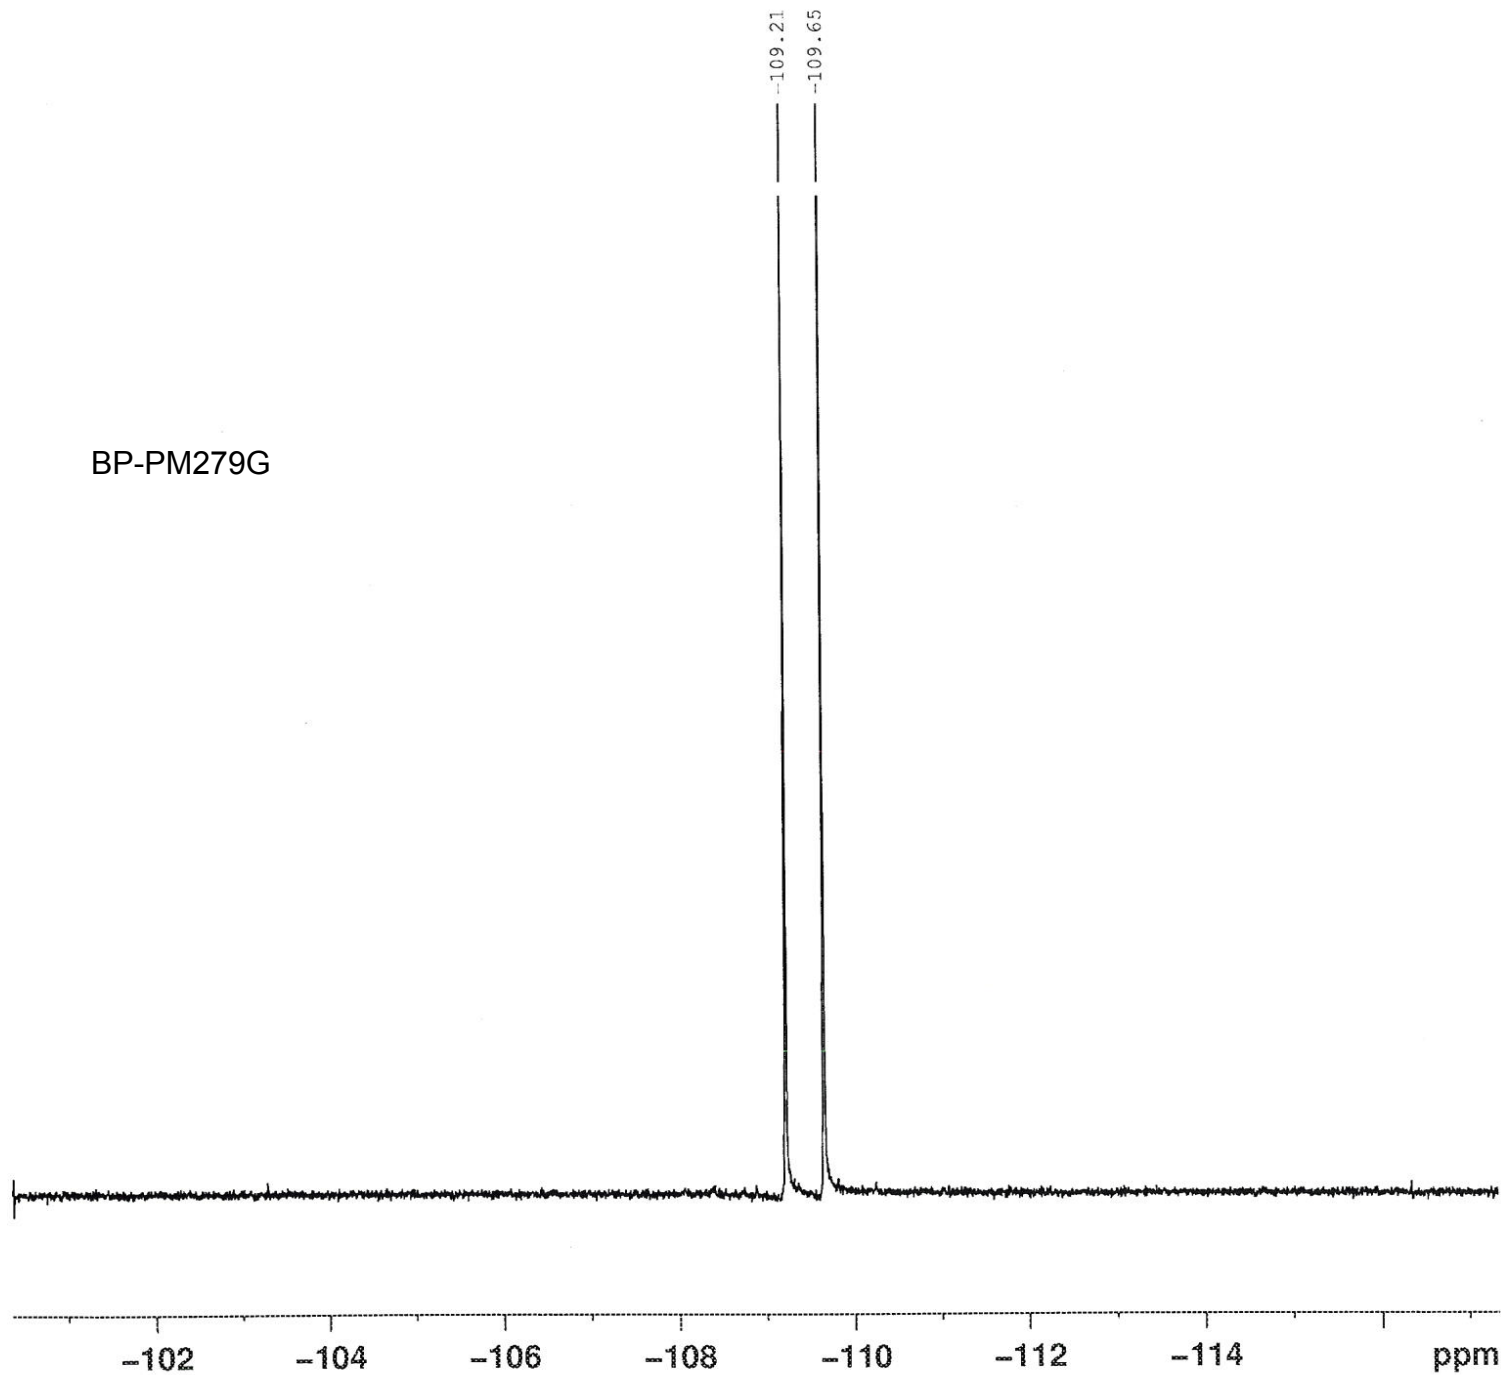

```
Current Data Parameters
NAME          279G
EXPNO         2
PROCNO        1

F2 - Acquisition Parameters
Date_         20090508
Time          9.26
INSTRUM       spect
PROBHD        5 mm QNP 1H/19
PULPROG       zgfhiggr
TD            131072
SOLVENT       Acetone
NS            60
DS            4
SWH           67567.570 Hz
FIDRES        0.515500 Hz
AQ            0.9699828 sec
RG            1824.6
DW            7.400 usec
DE            6.00 usec
TE            301.2 K
D1            1.0000000 sec
d11           0.0300000 sec
d12           0.0000200 sec
TDC           1

===== CHANNEL f1 =====
NUC1          19F
P1            12.00 usec
PL1           -4.00 dB
SFO1          282.3761148 MHz

===== CHANNEL f2 =====
CPDPRG2       waltz16
NUC2          1H
PCPD2         100.00 usec
PL2           -1.00 dB
PL12          19.00 dB
SFO2          300.1312005 MHz

F2 - Processing parameters
SI            65536
SF            282.4043550 MHz
WDW           EM
SSB           0
LB            0.30 Hz
GB            0
PC            1.00
```

BP-PM279G

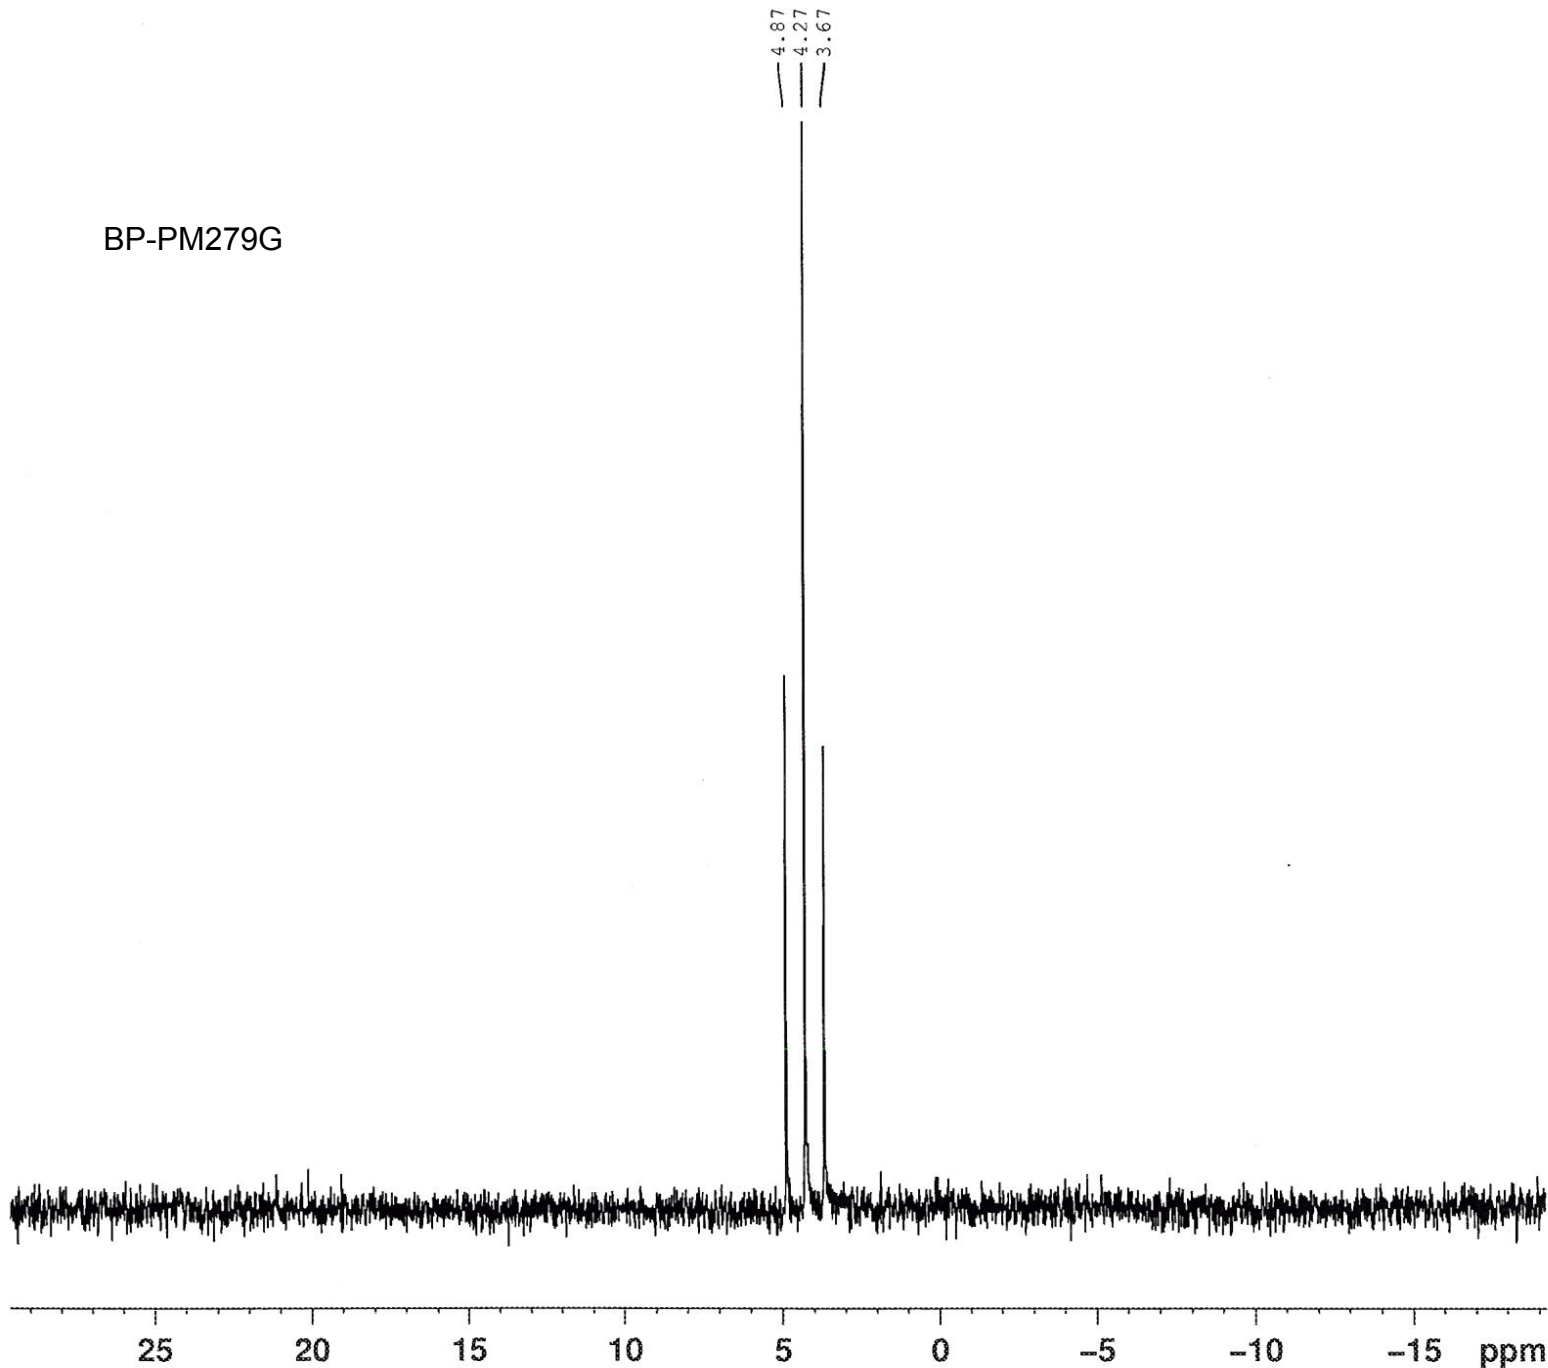

S46

```
Current Data Parameters
NAME          279G
EXPNO         4
PROCNO        1

F2 - Acquisition Parameters
Date_         20090508
Time          9.19
INSTRUM       spect
PROBHD        5 mm TXI 1H/D-
PULPROG       zgpg30
TD            65536
SOLVENT       Acetone
NS            103
DS            4
SWH           80645.164 Hz
FIDRES        1.230548 Hz
AQ            0.4063794 sec
RG            5792.6
DW            6.200 usec
DE            7.50 usec
TE            298.2 K
D1            2.00000000 sec
d11           0.03000000 sec
DELTA         1.899999998 sec
TD0           1

===== CHANNEL f1 =====
NUC1          31P
P1            15.00 usec
PL1           -4.50 dB
SFO1          202.4462121 MHz

===== CHANNEL f2 =====
CPDPRG2       waltz16
NUC2          1H
PCPD2         90.00 usec
PL2           -2.00 dB
PL12          18.50 dB
PL13          20.00 dB
SFO2          500.1320005 MHz

F2 - Processing parameters
SI            32768
SF            202.4563350 MHz
WDW           EM
SSB           0
LB            1.00 Hz
GB            0
PC            1.40
```

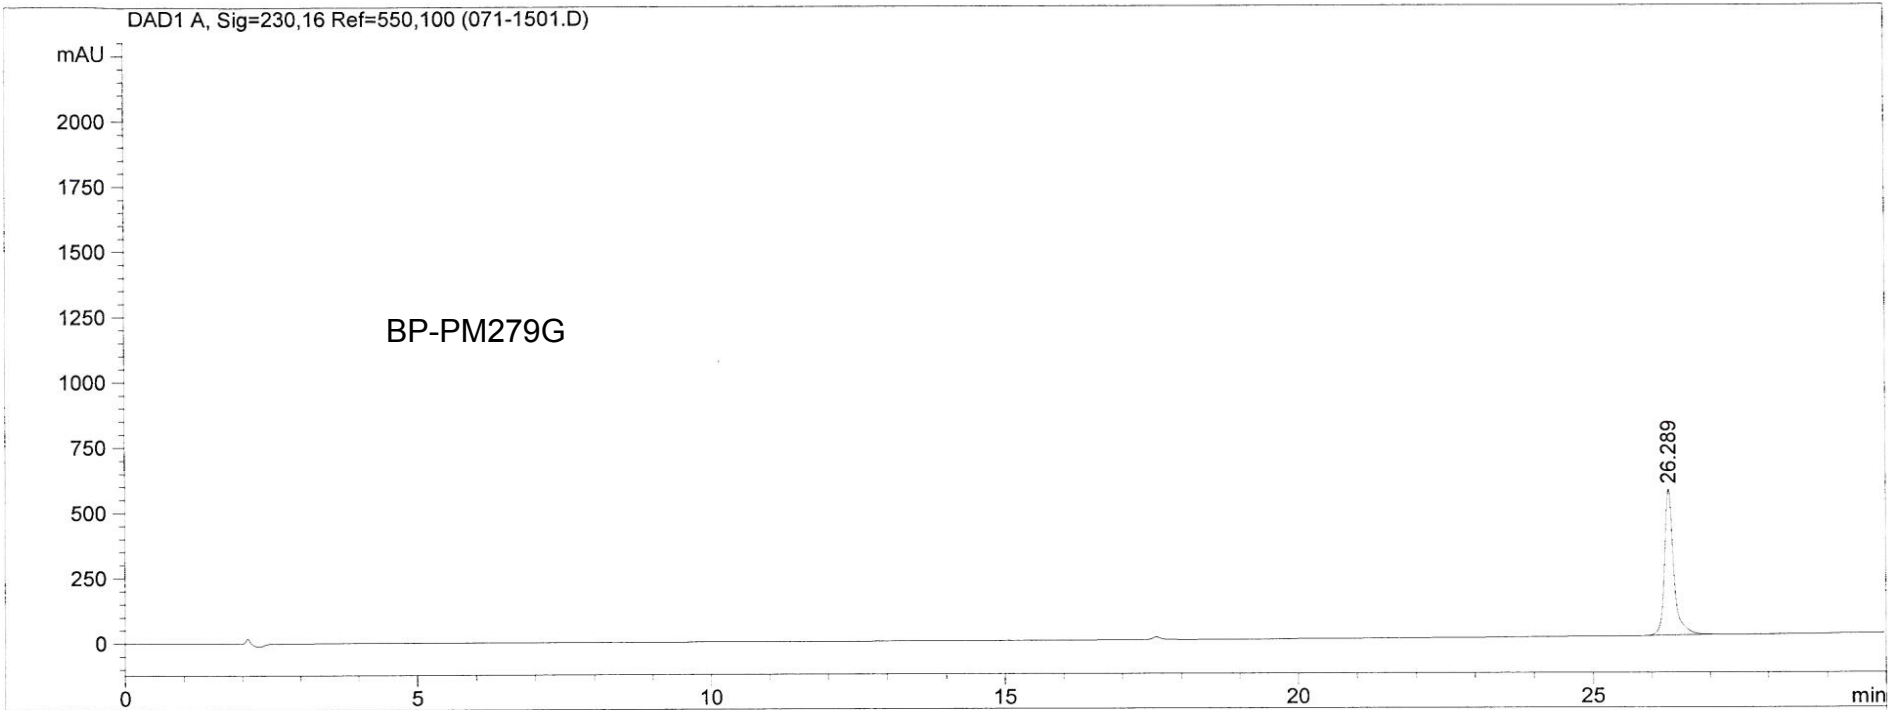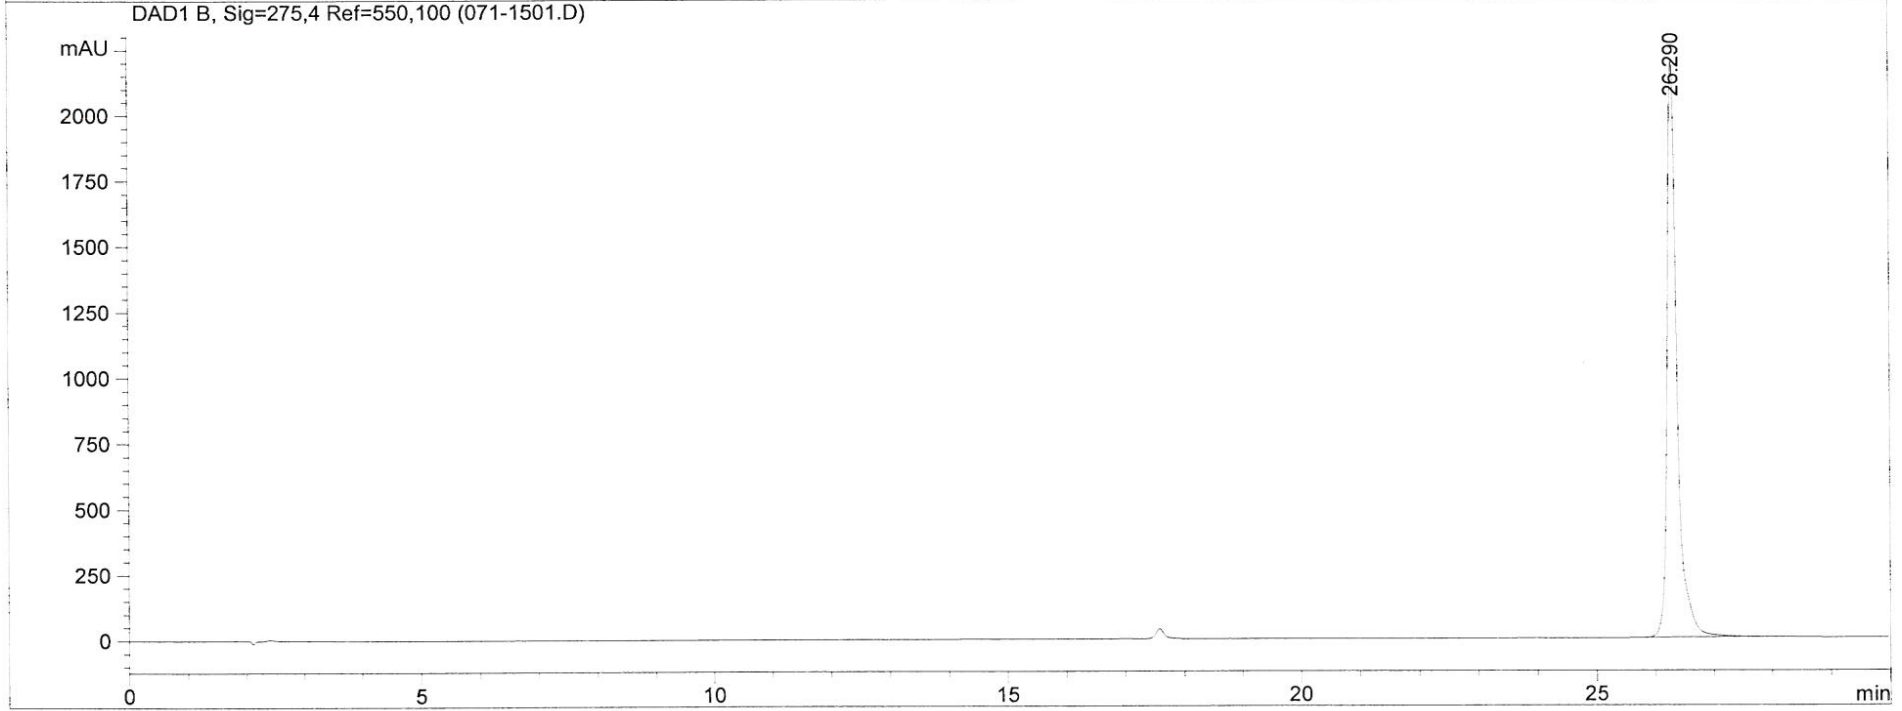

NP-PM6

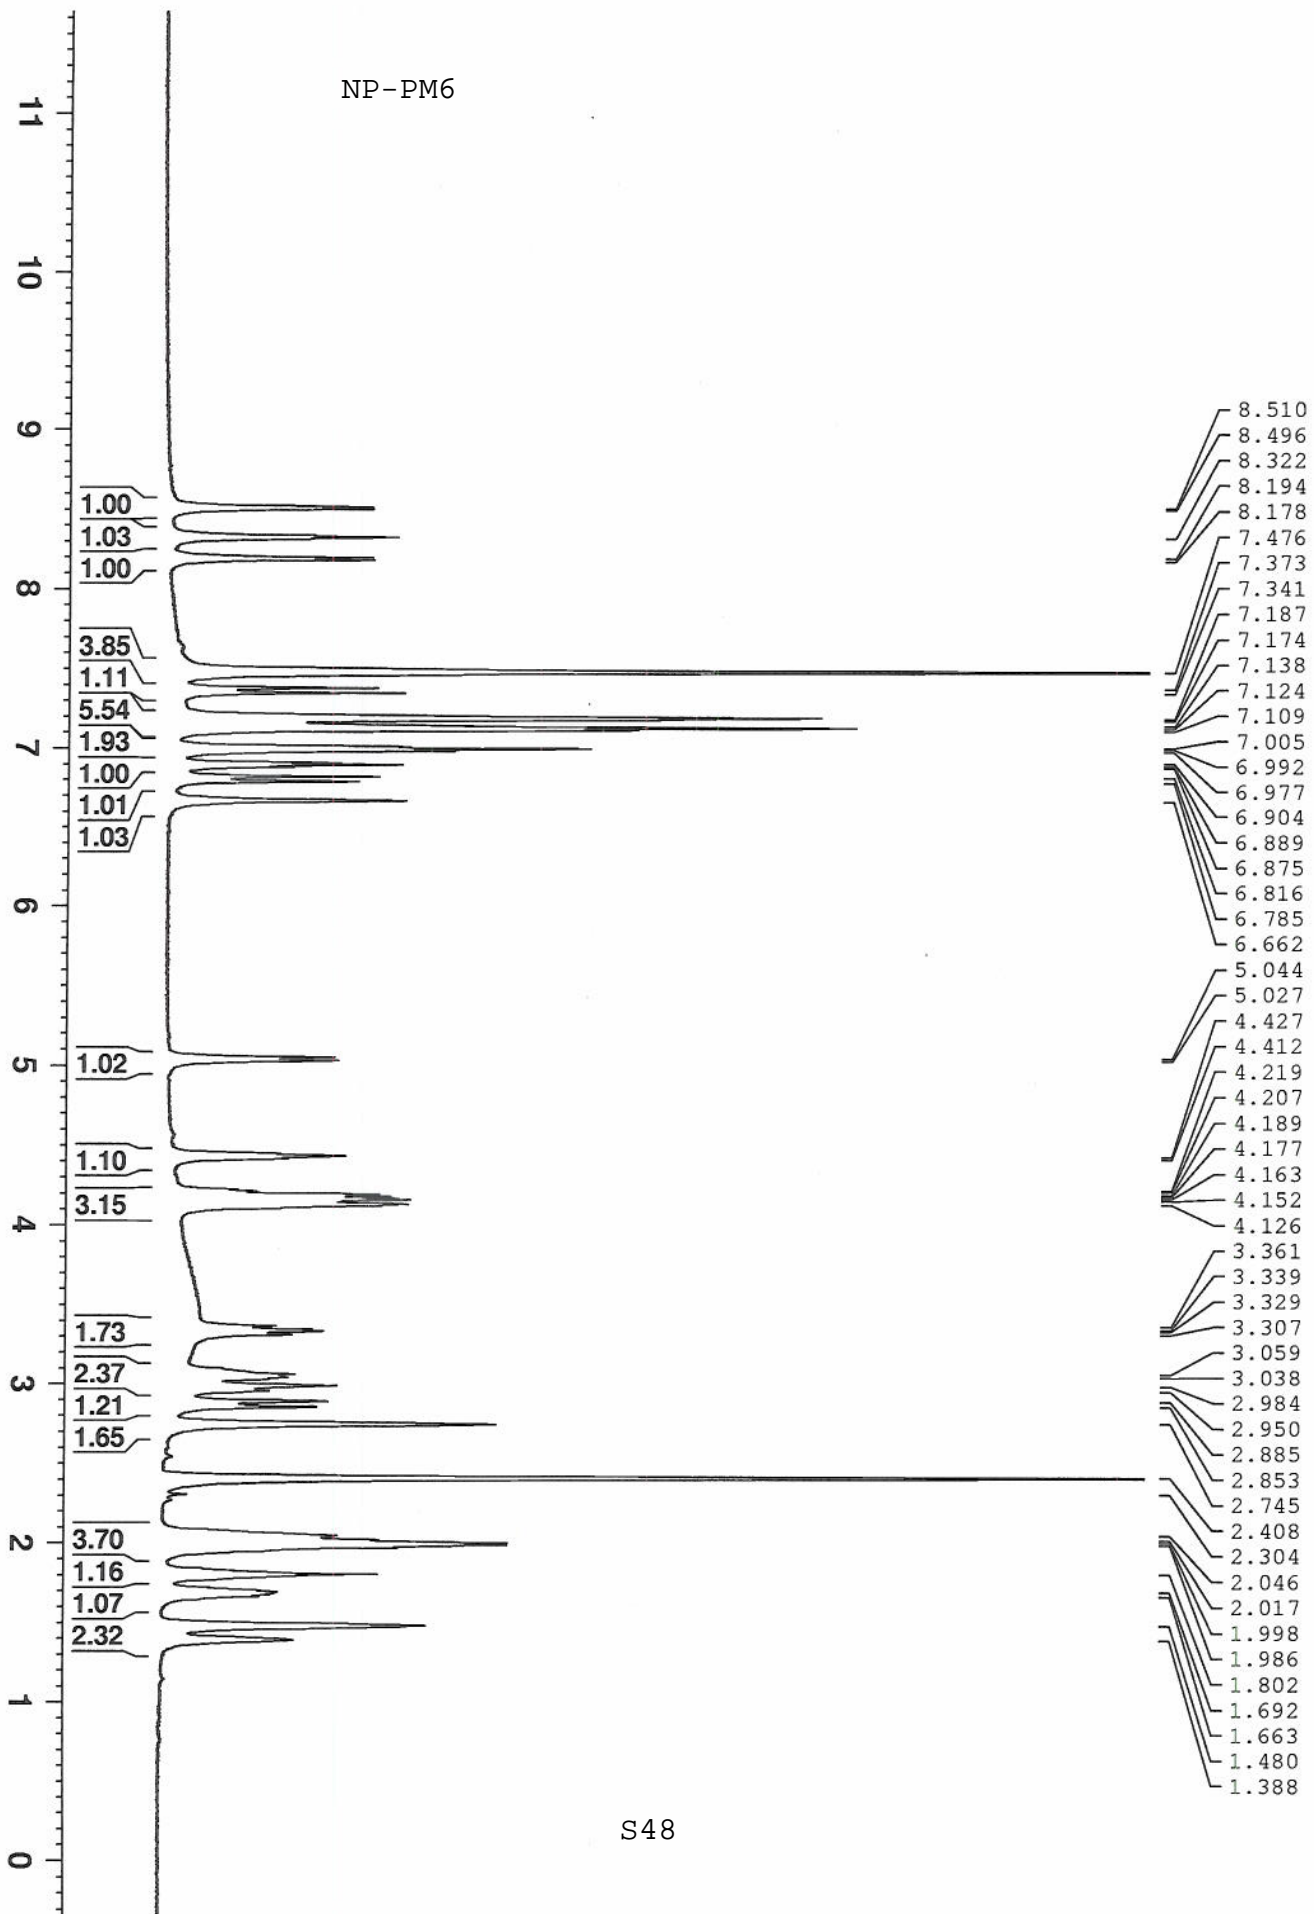

NP-PM6

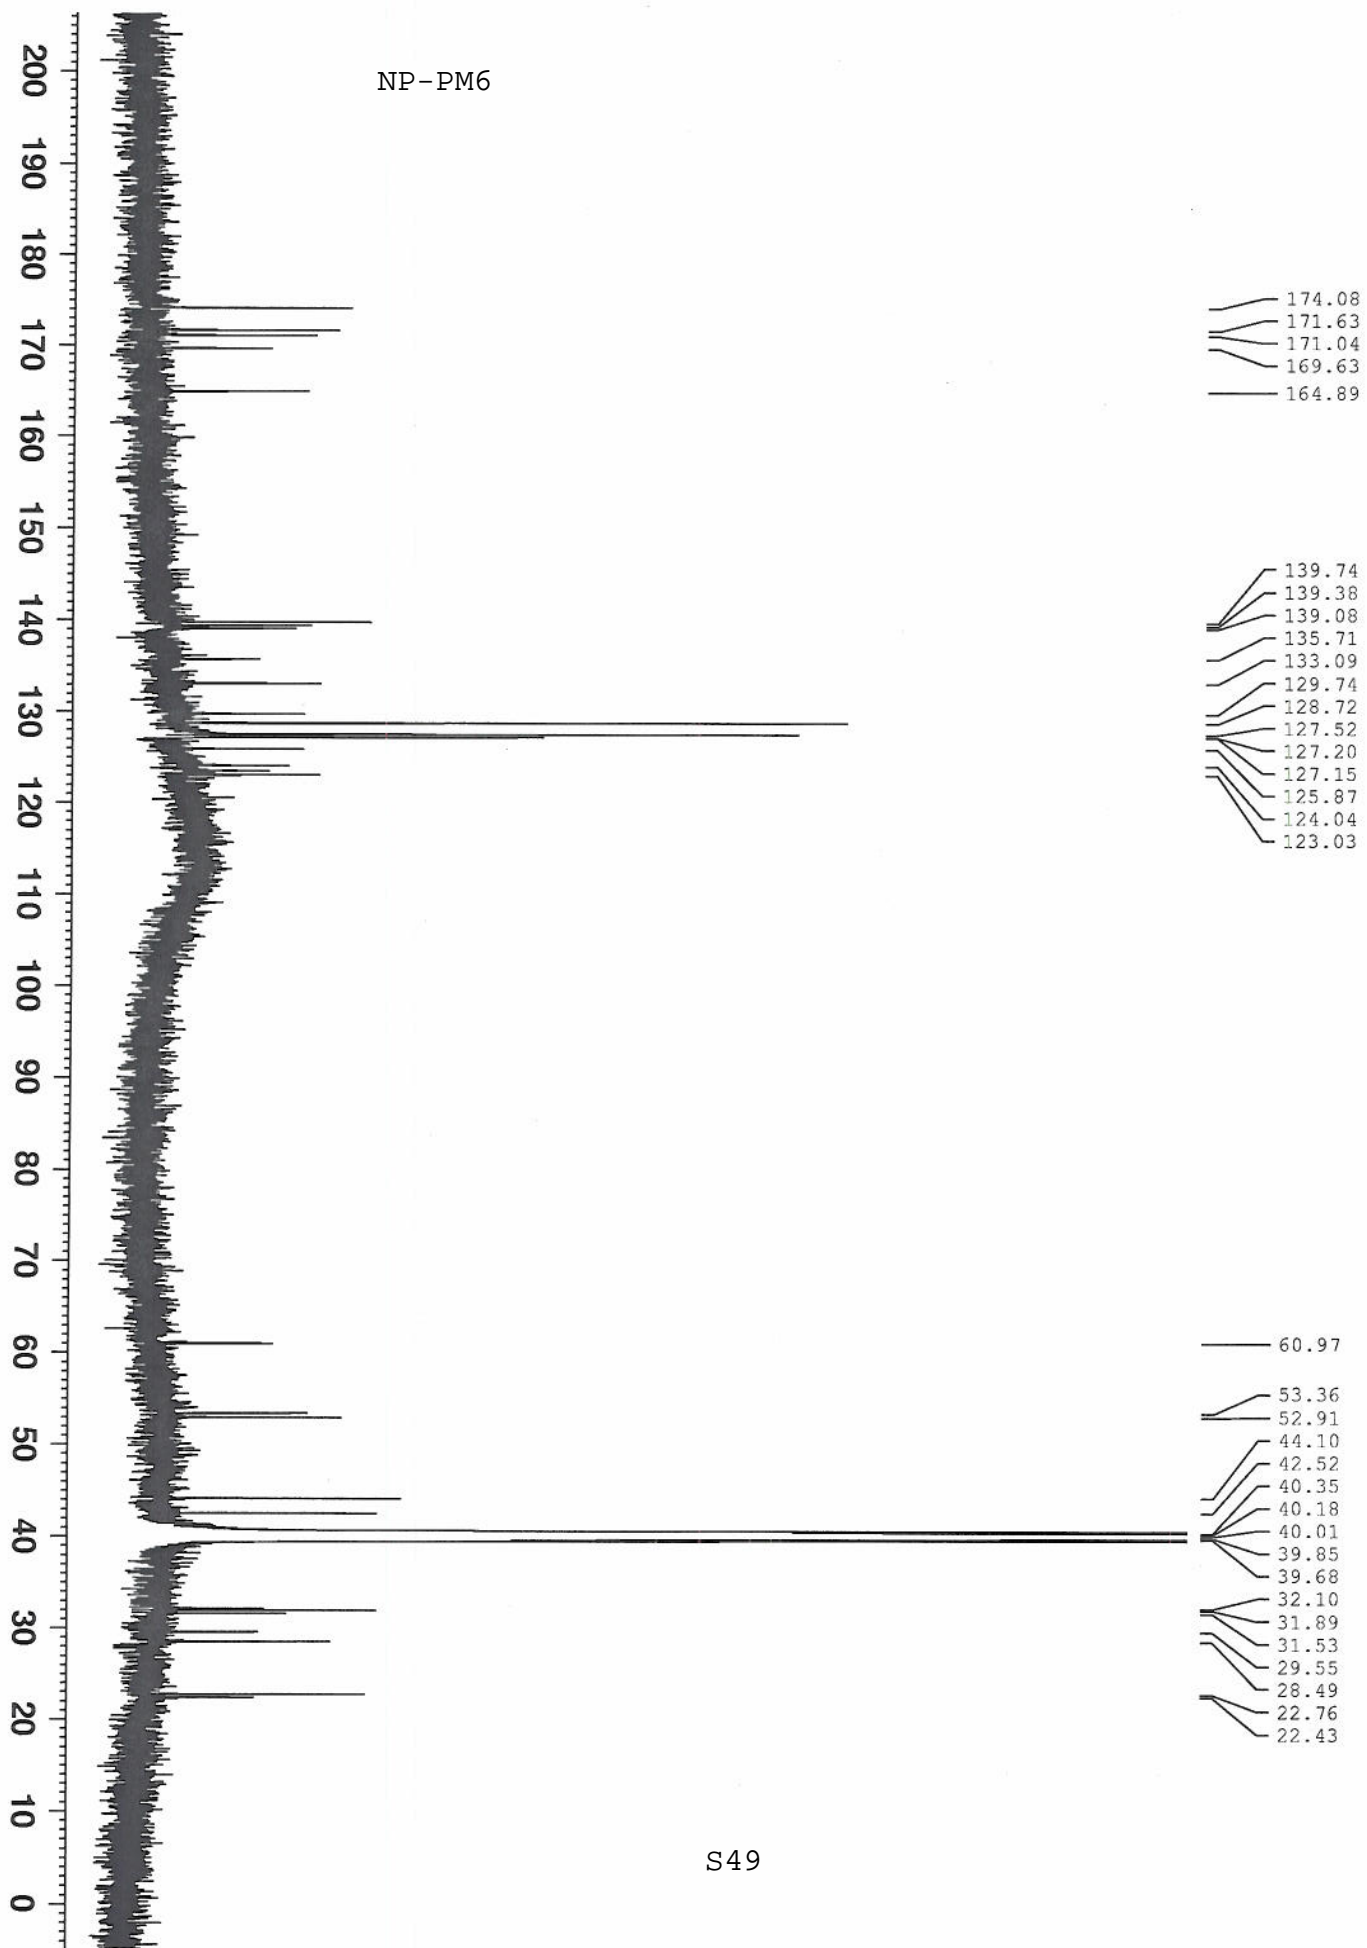

NP-PM6

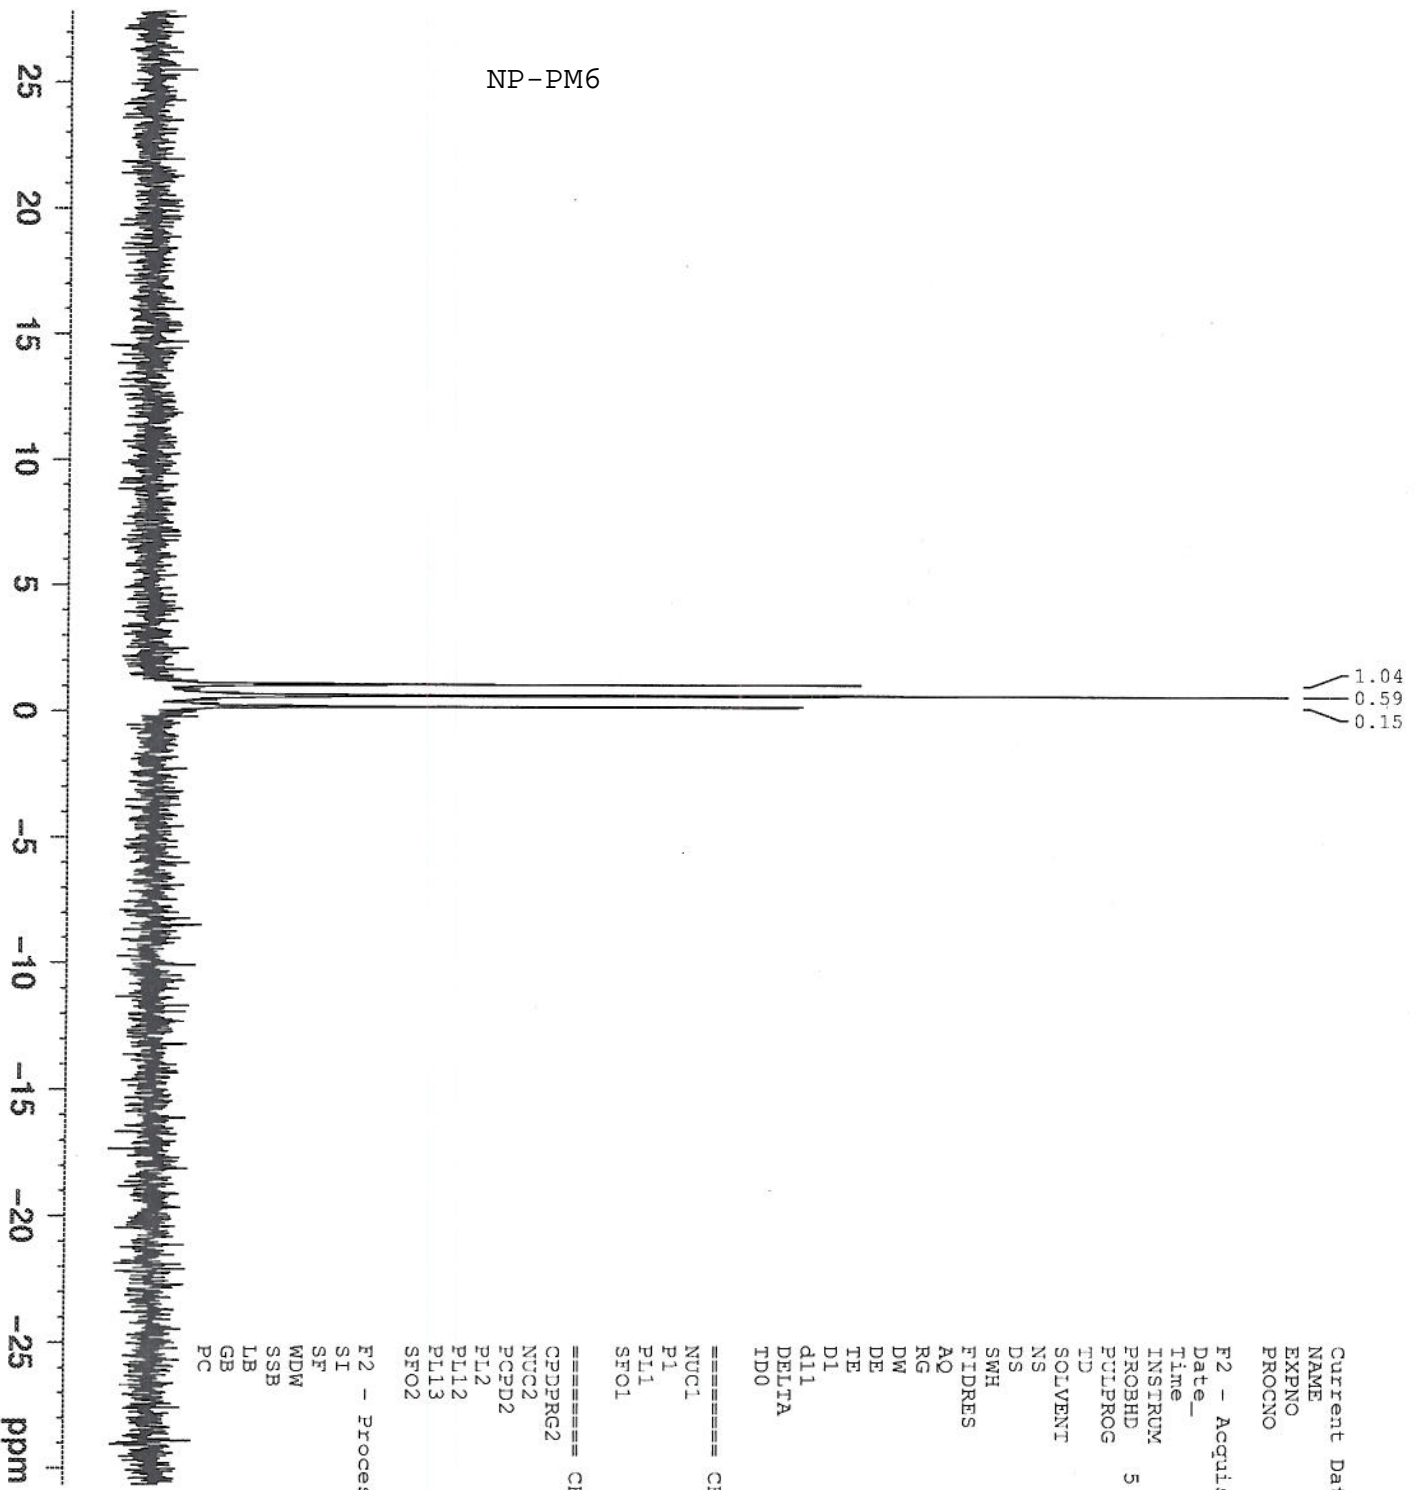

1.04  
0.59  
0.15

Current Data Parameters  
NAME 65G  
EXPNO 5  
PROCNO 1

F2 - Acquisition Parameters

Date\_ 20090706  
Time 11.57  
INSTRUM spect  
PROBHD 5 mm TXI 1H/D-  
PULPROG zgpg30  
TD 65536  
SOLVENT Acetone  
NS 516  
DS 4  
SWH 80645.164 Hz  
FIDRES 1.230548 Hz  
AQ 0.4063794 sec  
RG 18390.4  
DW 6.200 usec  
DE 7.50 usec  
TE 300.2 K  
D1 2.00000000 sec  
d11 0.03000000 sec  
DELTA 1.89999998 sec  
TD0 1

==== CHANNEL F1 =====

NUC1 31P  
P1 15.00 usec  
PL1 -4.50 dB  
SFO1 202.4462121 MHz

==== CHANNEL F2 =====

CPDPRG2 waltz16  
NUC2 1H  
PCPD2 90.00 usec  
PL2 -2.00 dB  
PL12 18.50 dB  
PL13 20.00 dB  
SFO2 500.1320005 MHz

F2 - Processing parameters

SI 32768  
SF 202.4563350 MHz  
WDW EM  
SSB 0  
LB 1.00 Hz  
GB 0  
PC 1.40

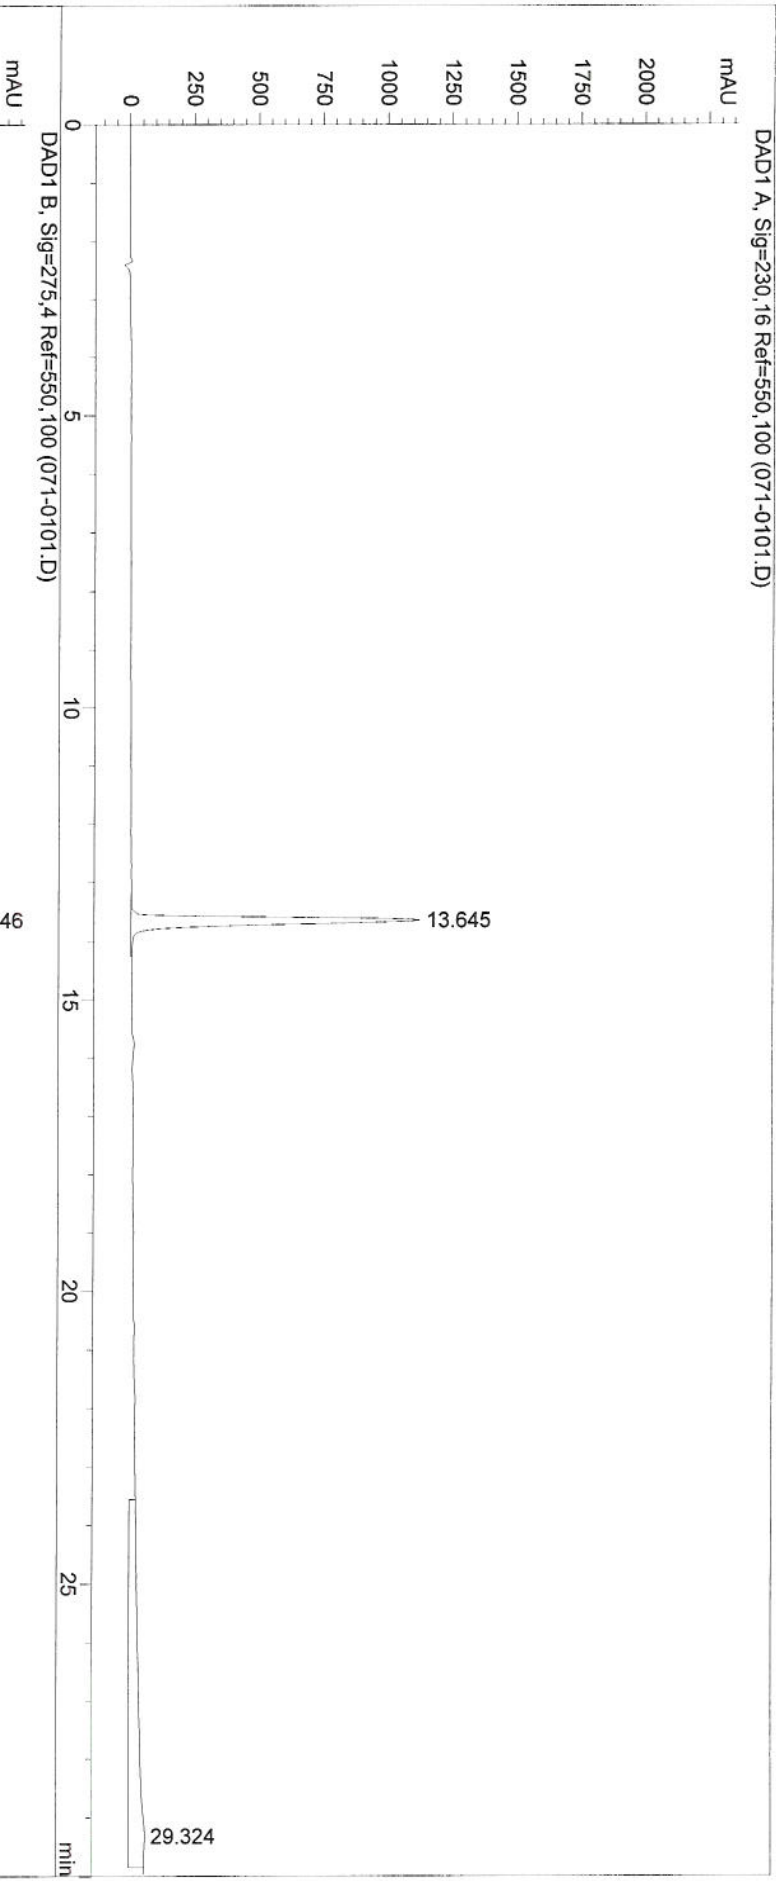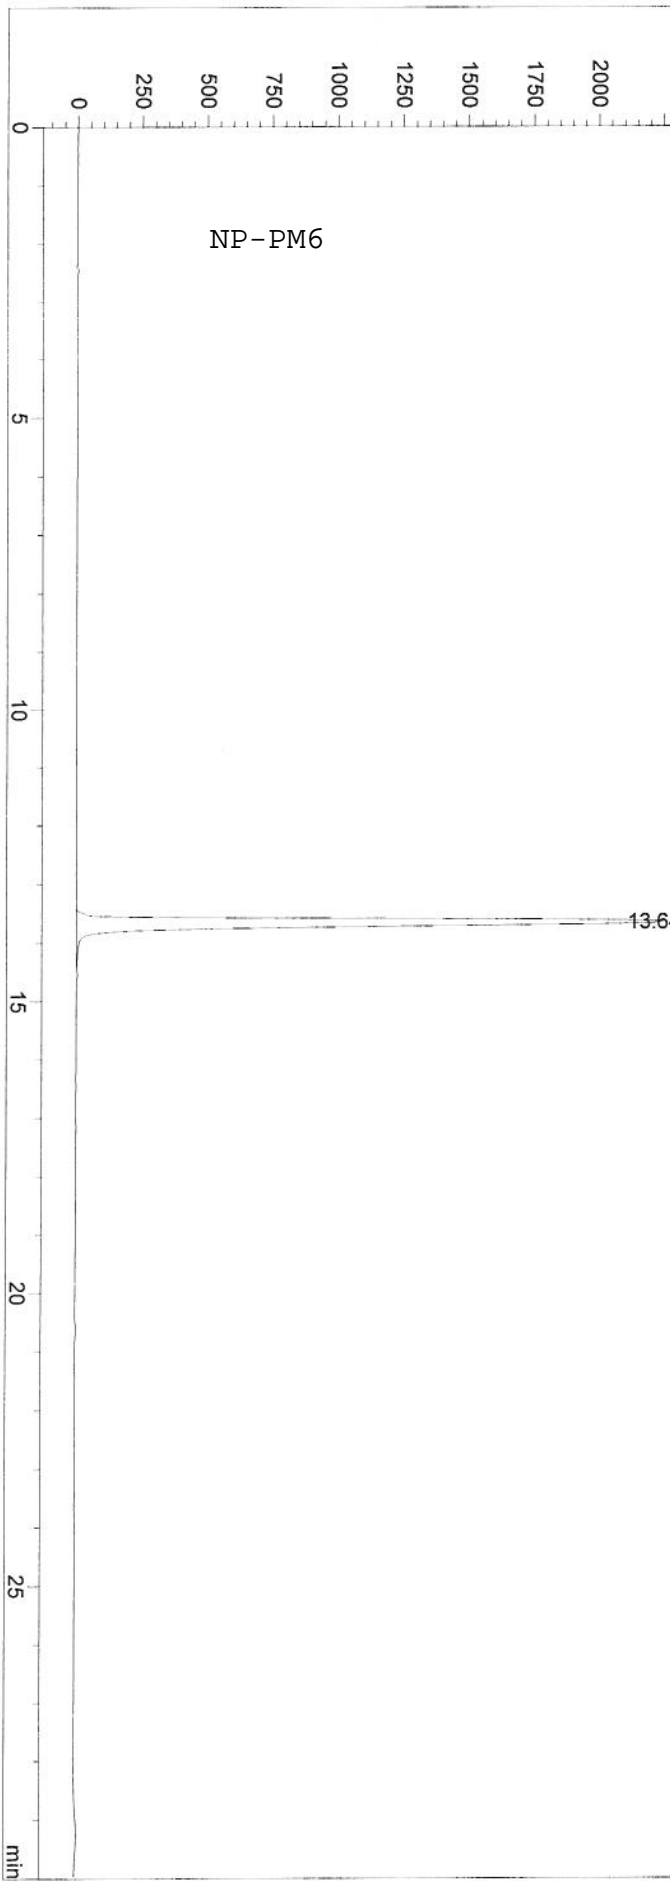

551



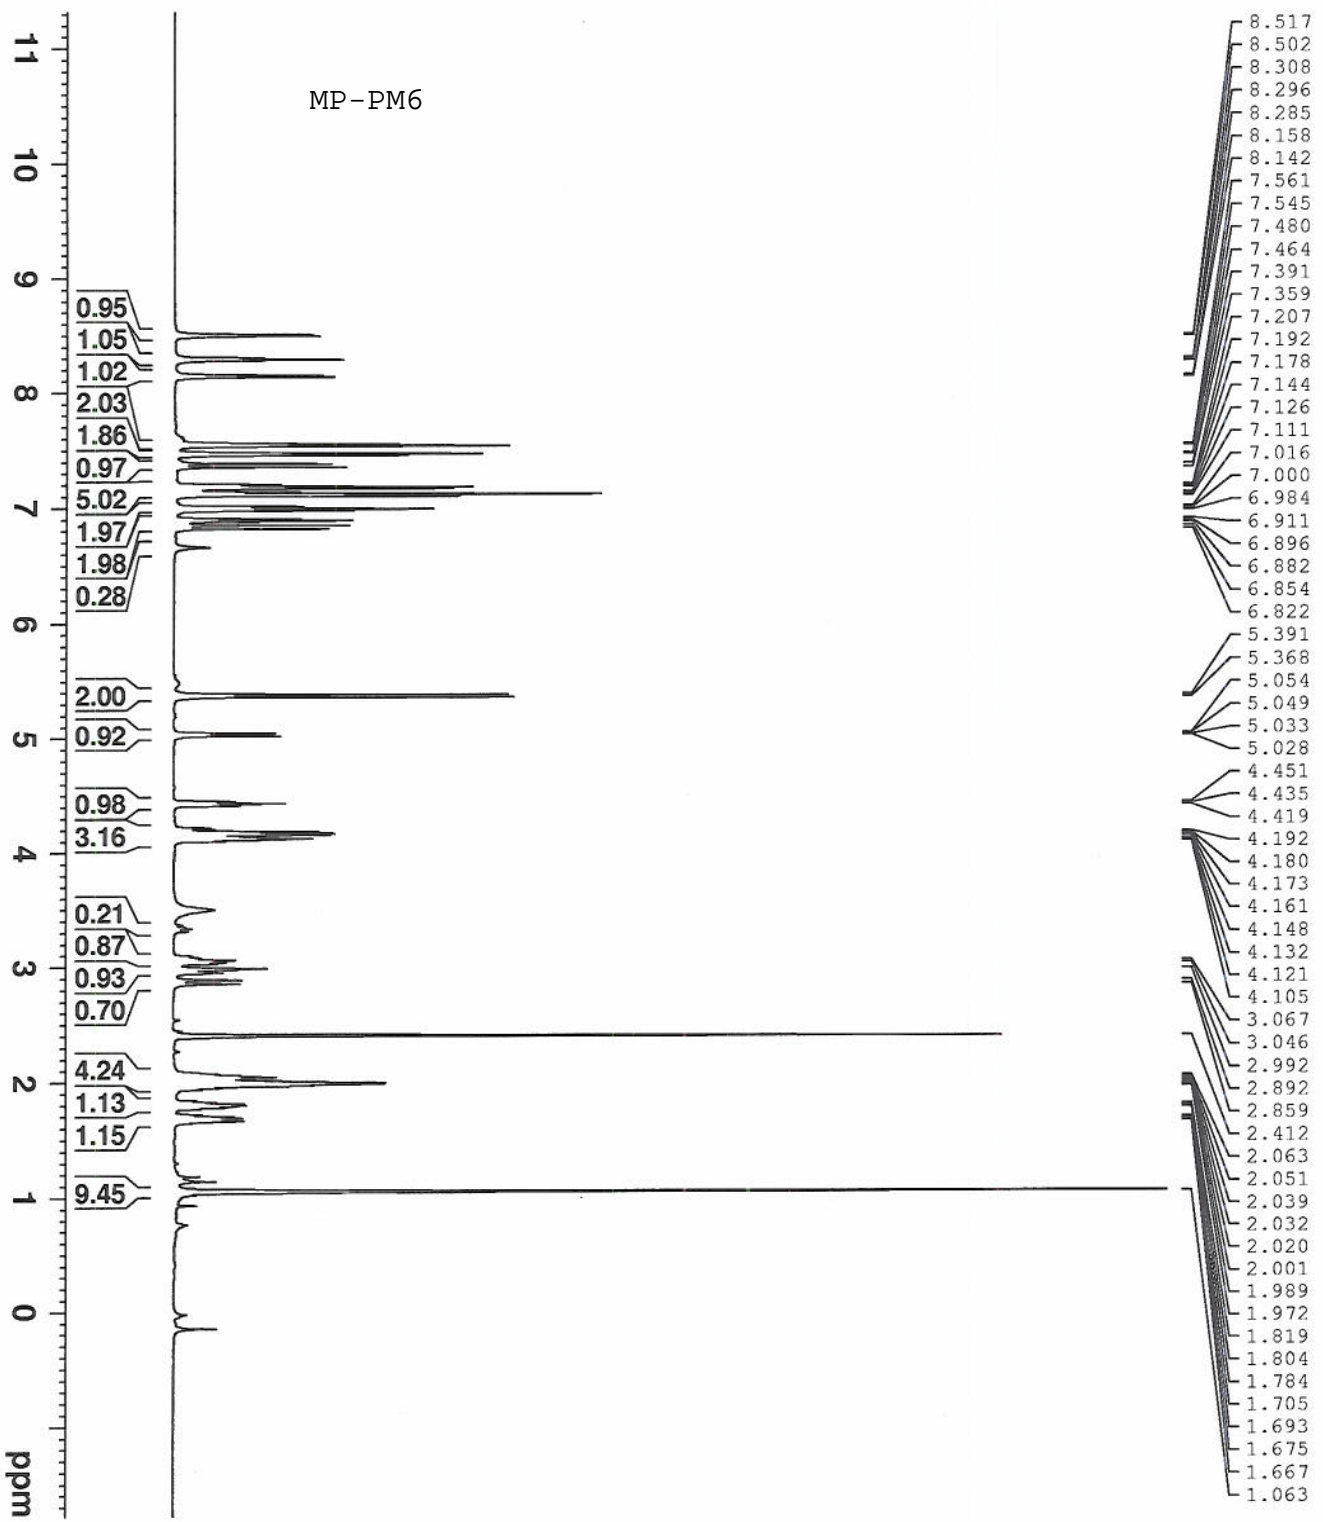

- 8.517
- 8.502
- 8.308
- 8.296
- 8.285
- 8.158
- 8.142
- 7.561
- 7.545
- 7.480
- 7.464
- 7.391
- 7.359
- 7.207
- 7.192
- 7.178
- 7.144
- 7.126
- 7.111
- 7.016
- 7.000
- 6.984
- 6.911
- 6.896
- 6.882
- 6.854
- 6.822
- 5.391
- 5.368
- 5.054
- 5.049
- 5.033
- 5.028
- 4.451
- 4.435
- 4.419
- 4.192
- 4.180
- 4.173
- 4.161
- 4.148
- 4.132
- 4.121
- 4.105
- 3.067
- 3.046
- 2.992
- 2.892
- 2.859
- 2.412
- 2.063
- 2.051
- 2.039
- 2.032
- 2.020
- 2.001
- 1.989
- 1.972
- 1.819
- 1.804
- 1.784
- 1.705
- 1.693
- 1.675
- 1.667
- 1.063

Current Data Parameters  
 NAME BPPM-6-MP  
 EXPNO 2  
 PROCNO 1

F2 - Acquisition Parameters

Date\_ 20090701  
 Time 14.13  
 INSTRUM spect  
 PROBHD 5 mm TXI 1H/D-  
 PULPROG zgpr  
 TD 65536  
 SOLVENT DMSO  
 NS 16  
 DS 2  
 SWH 10330.578 Hz  
 FIDRES 0.157632 Hz  
 AQ 3.1720407 sec  
 RG 161.3  
 DW 48.400 usec  
 DE 7.50 usec  
 TE 300.2 K  
 D1 1.00000000 sec  
 d12 0.00002000 sec  
 TD0 1

==== CHANNEL F1 =====

NUC1 1H  
 P1 8.00 usec  
 PL1 -2.00 dB  
 PL9 53.92 dB  
 SFO1 500.1317530 MHz

F2 - Processing parameters  
 SI 32768  
 SF 500.1300495 MHz  
 WDW EM  
 SSB 0  
 LB 0.30 Hz  
 GB 0  
 PC 1.00



MP-PM6

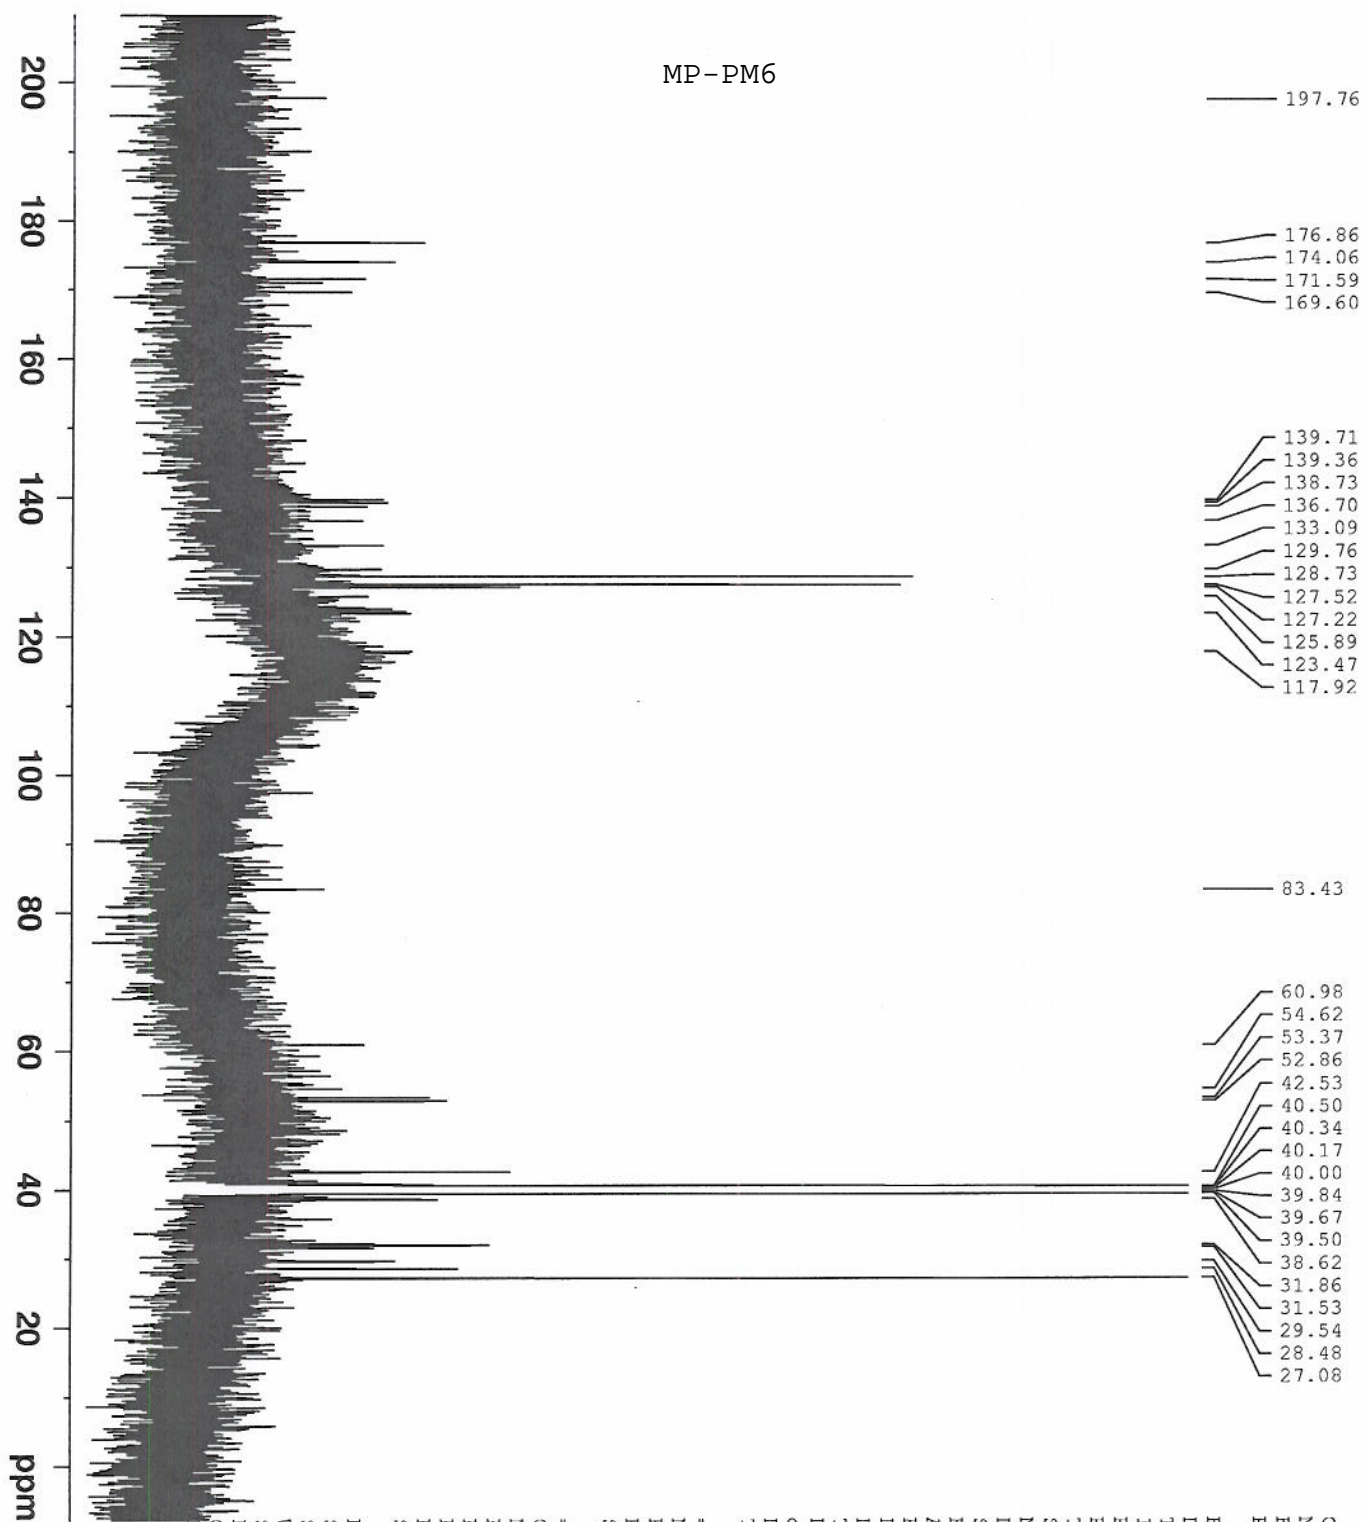

- 197.76
- 176.86
- 174.06
- 171.59
- 169.60
- 139.71
- 139.36
- 138.73
- 136.70
- 133.09
- 129.76
- 128.73
- 127.52
- 127.22
- 125.89
- 123.47
- 117.92
- 83.43
- 60.98
- 54.62
- 53.37
- 52.86
- 42.53
- 40.50
- 40.34
- 40.17
- 40.00
- 39.84
- 39.67
- 39.50
- 38.62
- 31.86
- 31.53
- 29.54
- 28.48
- 27.08

Current Data Parameters  
 NAME BPPM-6-MP  
 EXPNO 5  
 PROCNO 1

F2 - Acquisition Parameters  
 Date\_ 20090702  
 Time 6.35

INSTRUM spect  
 PROBHD 5 mm TXI 1H/D-  
 PULPROG zgpg30  
 TD 65536  
 SOLVENT CDCl3  
 NS 12288  
 DS 4

SWH 30030.029 Hz  
 FIDRES 0.458222 Hz  
 AQ 1.0912410 sec  
 RG 32768  
 DE 16.650 usec  
 TE 301.2 K

D1 2.00000000 sec  
 d11 0.03000000 sec  
 DELTA 1.89999998 sec  
 TD0 1

==== CHANNEL f1 =====  
 NUC1 13C  
 P1 11.25 usec  
 PL1 -5.50 dB  
 SFO1 125.7703643 MHz

==== CHANNEL f2 =====  
 CPDPRG2 waltz16  
 NUC2 1H  
 PCPD2 90.00 usec  
 PL2 -2.00 dB  
 PL12 18.50 dB  
 PL13 20.00 dB  
 SFO2 500.1320005 MHz

F2 - Processing parameters  
 SI 32768  
 SF 125.7577890 MHz  
 WDW EM  
 SSB 0  
 LB 1.00 Hz  
 GB 0  
 PC 1.40

MP-PM6

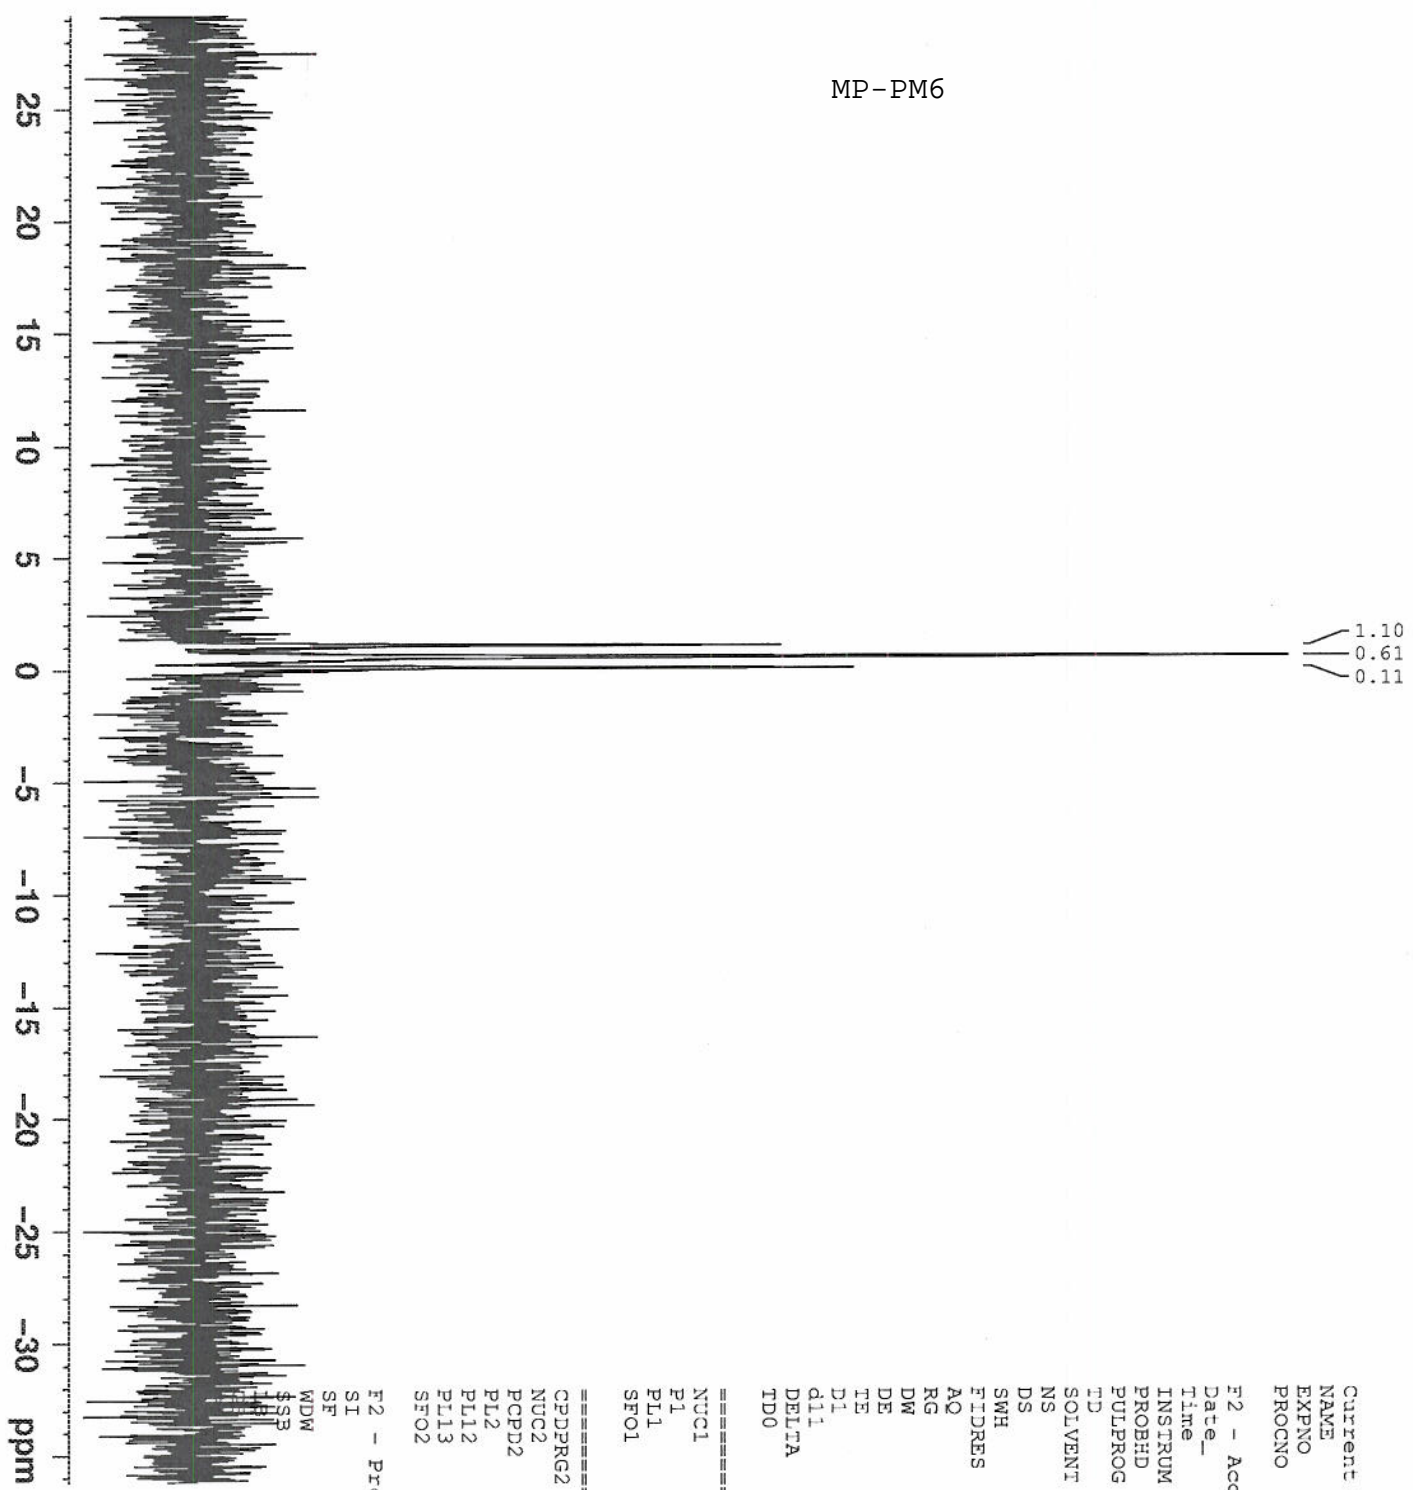

1.10  
0.61  
0.11

Current Data Parameters  
NAME BPPM-6-MP  
EXPNO 7  
PROCNO 1

F2 - Acquisition Parameters

Date\_ 20090702  
Time 13.01  
INSTRUM spect  
PROBHD 5 mm TXI 1H/D-  
PULPROG zgpg30  
TD 65536  
SOLVENT Acetone  
NS 1024  
DS 4  
SWH 80645.164 Hz  
FIDRES 1.230548 Hz  
AQ 0.4063794 sec  
RG 20642.5  
DW 6.200 usec  
DE 7.50 usec  
TE 300.2 K  
D1 2.00000000 sec  
d11 0.03000000 sec  
DELTA 1.89999998 sec  
TD0 1

==== CHANNEL F1 =====

NUC1 31P  
P1 15.00 usec  
PL1 -4.50 dB  
SFO1 202.4462121 MHz

==== CHANNEL F2 =====

CPDPRG2 waltz16  
NUC2 1H  
PCPD2 90.00 usec  
PL2 -2.00 dB  
PL12 18.50 dB  
PL13 20.00 dB  
SFO2 500.1320005 MHz

F2 - Processing parameters

SI 32768  
SF 202.4563350 MHz  
WDW EM  
SSB 0  
GB 0  
PC 1.00 Hz  
SC 0  
SB 1.40

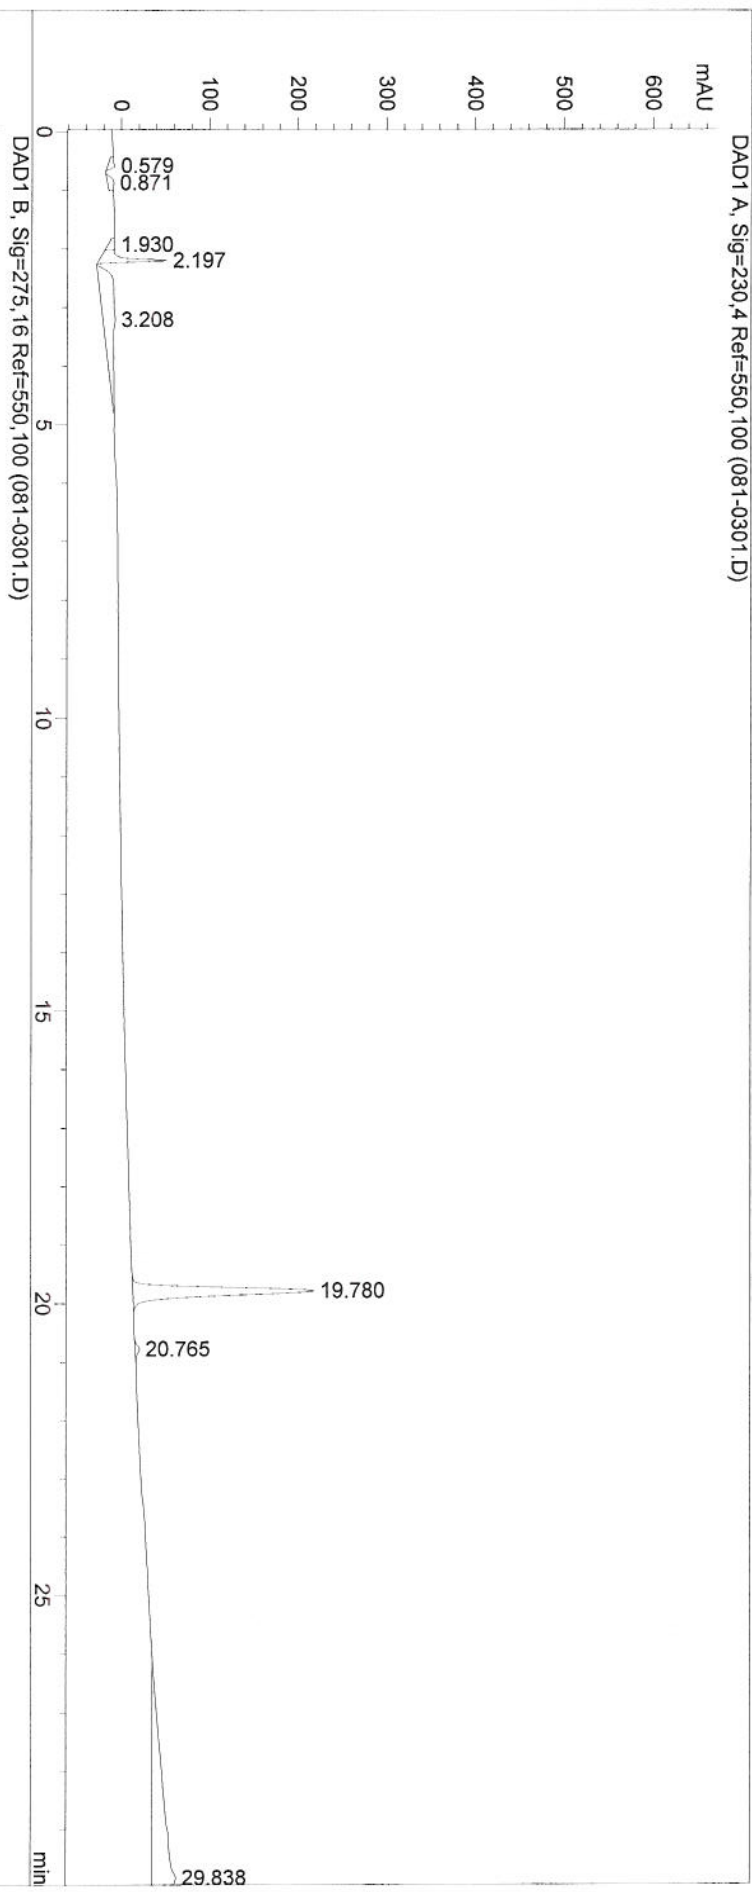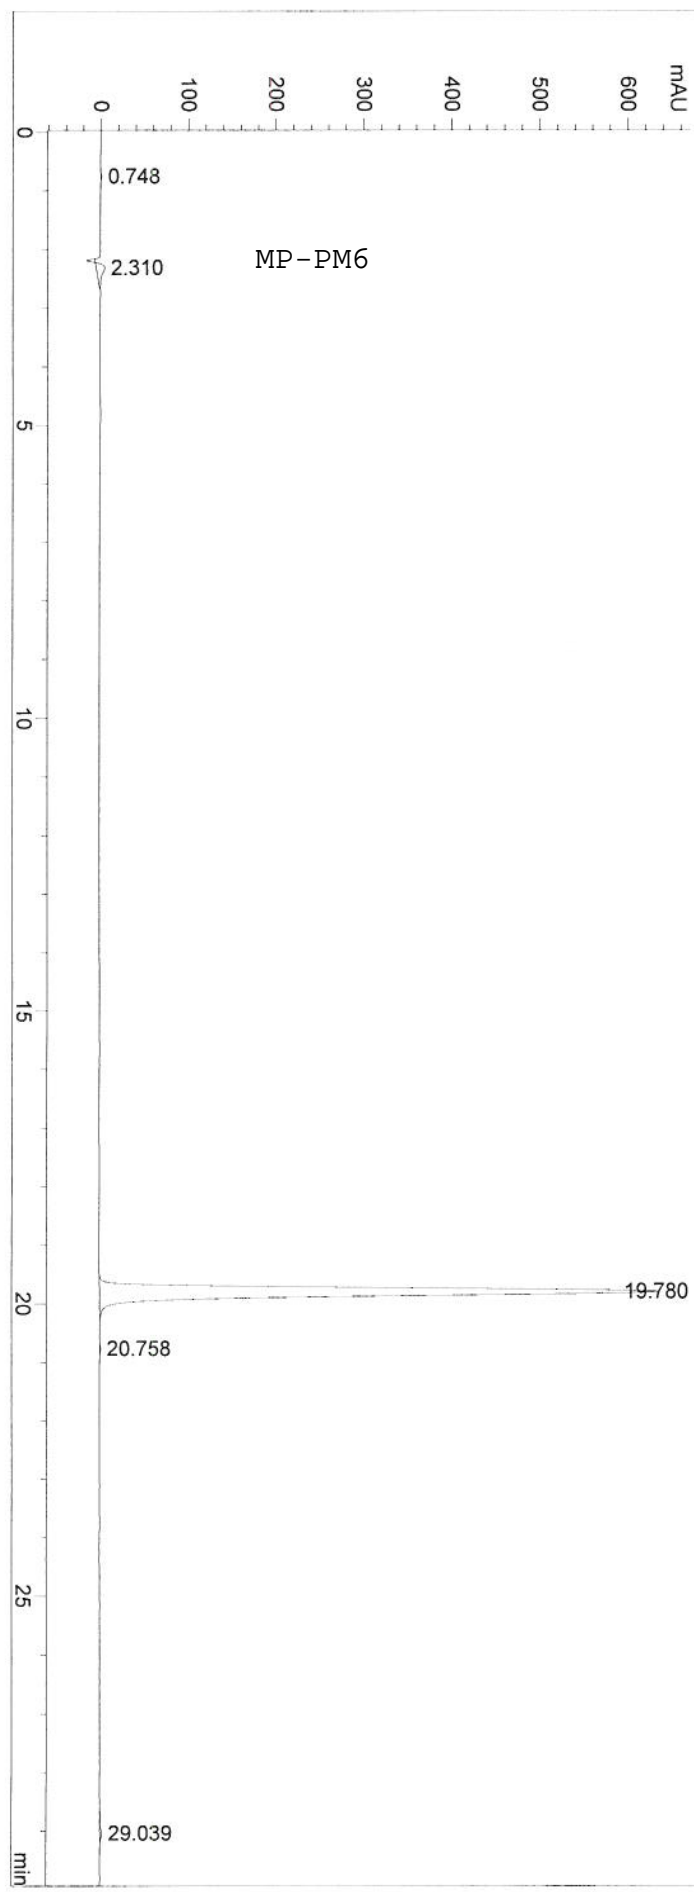

Supplement: NIHMS132264-supplement-1_si_001.pdf [file NIHMS132264-supplement-1_si_001.pdf]
